# Supplementary material
Source: PubMed Central journal article supplement (PMC2791625)
Supplement: 0911093106_Appendix_PDF.pdf [file 0911093106_Appendix_PDF.pdf]

| O. sativa                                                                                                                                                           |                                                                                                                                                                     |                                                                                                                                       |                                                             |                            |                         |            |         |       |         |          |           |           |
|---------------------------------------------------------------------------------------------------------------------------------------------------------------------|---------------------------------------------------------------------------------------------------------------------------------------------------------------------|---------------------------------------------------------------------------------------------------------------------------------------|-------------------------------------------------------------|----------------------------|-------------------------|------------|---------|-------|---------|----------|-----------|-----------|
| GeneID (CDS intron positions; * indicates new intron position)                                                                                                      | Ortholog1 (CDS intron positions)                                                                                                                                    | Ortholog2 (CDS intron positions)                                                                                                      | New Intron Position (Type) EST evidence                     | Internal duplicated Region |                         |            |         |       |         |          |           |           |
|                                                                                                                                                                     |                                                                                                                                                                     |                                                                                                                                       |                                                             | Query id                   | Subject id              | % identity | q_start | q_end | s_start | s_end    | e-value   | bit score |
| LOC_060637430.1(292*(1)1272/484/628/843/1021)                                                                                                                       | PGRNESL_PG.C.CHW_4000117(205/272/484/628/843/1021)                                                                                                                  | AT2045320.1(272/484/628/843/1021)                                                                                                     | 92(new/est)                                                 | LOC_060637430.2.exon.2     | LOC_060637430.2.exon.2  | 87.5       | 42      | 85    | 81      | 104      | 4.00E-19  | 23.5      |
| LOC_0612041890.1(422/762*(2)1)                                                                                                                                      | S801001690(422)                                                                                                                                                     | AT4021120.1(422/1088)                                                                                                                 | 762(new)                                                    | LOC_0612041890.1.exon.2    | LOC_0612041890.1.exon.2 | 55.56      | 41      | 94    | 167     | 220      | 6.00E-07  | 21.7      |
| LOC_060932380.1(168*(1)1271/2379)                                                                                                                                   | E_GMI_8_13429.1(838/2173/2293)                                                                                                                                      | AV7022220.2(1271/2379/2606/2688)                                                                                                      | 168(new/est)                                                | LOC_060932380.1.exon.2     | LOC_060932380.1.exon.2  | 78.87      | 462     | 379   | 548     | 463      | 2.00E-11  | 56.1      |
| LOC_060649300.1(155/214*(2)1)                                                                                                                                       | E_GMI_10_16242.1(155)                                                                                                                                               | AV3018170.1(1)                                                                                                                        | 212(new)                                                    | LOC_060649300.1.exon.1     | LOC_060649300.1.exon.3  | 46.67      | 788     | 744   | 884     | 840      | 5.00E-77  | 56.1      |
| LOC_0611027440.1(888/3078*(2)1)                                                                                                                                     | E_GMI_6_2078.1(888)                                                                                                                                                 | AT3046730.1(1)                                                                                                                        | 3078(new)                                                   | LOC_0611027440.1.exon.1    | LOC_0611027440.1.exon.3 | 46.43      | 902     | 889   | 892     | 789      | 5.00E-15  | 61.1      |
| LOC_060932550.1(162*(1)1421)                                                                                                                                        | ESTEXT_PGRNESL_PG.C.CHW_2268480(1421)                                                                                                                               | AT3007320.1(897/1421)                                                                                                                 | 62(new/est)                                                 | LOC_060932550.1.exon.2     | LOC_060932550.1.exon.2  | 38.71      | 991     | 899   | 198     | 106      | 6.00E-12  | 22.6      |
| LOC_060704550.1(187/565*(2)121/6*(3)2596*(4)2694*(5)1038*(6)4914*(7)5389)                                                                                           | S807002670(1387/342/5389)                                                                                                                                           | AT5018960.1(527/3216/4218/5389)                                                                                                       | 2178(dup);2038(dup);2596(new);2694(new);4914(new);5389(new) | LOC_060704550.1.exon.1     | LOC_060704550.1.exon.6  | 64.44      | 73      | 207   | 164     | 295      | 8.00E-18  | 75.3      |
|                                                                                                                                                                     |                                                                                                                                                                     |                                                                                                                                       |                                                             | LOC_060704550.1.exon.1     | LOC_060704550.1.exon.6  | 42.31      | 30      | 183   | 118     | 273      | 1.00E-08  | 44.6      |
|                                                                                                                                                                     |                                                                                                                                                                     |                                                                                                                                       |                                                             | LOC_060704550.1.exon.2     | LOC_060704550.1.exon.7  | 61.43      | 14      | 118   | 17      | 121      | 1.00E-10  | 23.7      |
|                                                                                                                                                                     |                                                                                                                                                                     |                                                                                                                                       |                                                             | LOC_060704550.1.exon.3     | LOC_060704550.1.exon.7  | 46.78      | 107     | 829   | 740     | 1178     | 1.00E-88  | 237       |
|                                                                                                                                                                     |                                                                                                                                                                     |                                                                                                                                       |                                                             | LOC_060704550.1.exon.3     | LOC_060704550.1.exon.8  | 38.48      | 318     | 104   | 318     | 1        | 2.00E-18  | 89.3      |
|                                                                                                                                                                     |                                                                                                                                                                     |                                                                                                                                       |                                                             | LOC_060704550.1.exon.4     | LOC_060704550.1.exon.9  | 62.81      | 43      | 405   | 40      | 402      | 3.00E-49  | 180       |
|                                                                                                                                                                     |                                                                                                                                                                     |                                                                                                                                       |                                                             | LOC_060704550.1.exon.7     | LOC_060704550.1.exon.3  | 43.33      | 5       | 94    | 1166    | 1245     | 5.00E-08  | 32.3      |
| LOC_060305310.1(8*(1)211)                                                                                                                                           | PGRNESL_PG.C.CHW_4001136(91)                                                                                                                                        | AT3004530.1(91)                                                                                                                       | 91(new)                                                     | LOC_060305310.1.exon.2     | LOC_060305310.1.exon.2  | 65.58      | 360     | 287   | 426     | 372      | 3.00E-11  | 21.7      |
| LOC_060305310.1(324*(1)180/346*(3)1046)                                                                                                                             | AT3013570.1(180/346)                                                                                                                                                | S803002890(180/346)                                                                                                                   | 234(new);985(new)                                           | LOC_060305310.1.intron.1   | LOC_060305310.1.exon.2  | 65.26      | 376     | 381   | 237     | 350      | 1.00E-13  | 65.6      |
|                                                                                                                                                                     |                                                                                                                                                                     |                                                                                                                                       |                                                             | LOC_060305310.1.exon.2     | LOC_060305310.1.exon.2  | 61.19      | 354     | 354   | 1       | 203      | 1.00E-28  | 96.8      |
| LOC_0612040070.1(61/1408/609/655*(4)993/1117/1201/1398/1644/1782)                                                                                                   | E_GMI_8_14415.1(61/1335/409/603/993/1117/1201/1398/1644/1784/1786)                                                                                                  | AT3018990.1(61/1408/1163/1399)                                                                                                        | 655(dup)                                                    | LOC_0612040070.1.exon.2    | LOC_0612040070.1.exon.5 | 68.97      | 16      | 276   | 18      | 276      | 4.00E-40  | 148       |
|                                                                                                                                                                     |                                                                                                                                                                     |                                                                                                                                       |                                                             | LOC_0612040070.1.exon.2    | LOC_0612040070.1.exon.7 | 56.52      | 5       | 73    | 5       | 73       | 1.00E-05  | 34.5      |
|                                                                                                                                                                     |                                                                                                                                                                     |                                                                                                                                       |                                                             | LOC_0612040070.1.exon.9    | LOC_0612040070.1.exon.1 | 34.04      | 115     | 235   | 118     | 258      | 2.00E-08  | 42.8      |
|                                                                                                                                                                     |                                                                                                                                                                     |                                                                                                                                       |                                                             | LOC_0612040070.1.intron.2  | LOC_0612040070.1.exon.6 | 61.11      | 557     | 504   | 124     | 71       | 3.00E-04  | 31.3      |
|                                                                                                                                                                     |                                                                                                                                                                     |                                                                                                                                       |                                                             | LOC_0612040070.1.intron.2  | LOC_0612040070.1.exon.6 | 62.94      | 492     | 442   | 53      | 31       | 3.00E-08  | 21.3      |
|                                                                                                                                                                     |                                                                                                                                                                     |                                                                                                                                       |                                                             | LOC_0612040070.1.intron.6  | LOC_0612040070.1.exon.6 | 58.18      | 115     | 280   | 115     | 82       | 3.00E-28  | 109.3     |
|                                                                                                                                                                     |                                                                                                                                                                     |                                                                                                                                       |                                                             | LOC_0612040070.1.intron.7  | LOC_0612040070.1.exon.5 | 63.85      | 7       | 201   | 82      | 276      | 3.00E-28  | 93.2      |
| LOC_060242150.1(2147/1325/2220*(2)1469/1631)                                                                                                                        | PGRNESL_PG.C.CHW_4002215(950/1631/1469)                                                                                                                             | AT3021230.1(1469/1631)                                                                                                                | 1325(new/est)                                               | LOC_060242150.2.exon.1     | LOC_060242150.2.exon.2  | 64.55      | 189     | 204   | 24      | 89       | 2.00E-07  | 40.9      |
|                                                                                                                                                                     |                                                                                                                                                                     |                                                                                                                                       |                                                             | LOC_060242150.2.exon.1     | LOC_060242150.2.exon.3  | 61.9       | 844     | 806   | 81      | 143      | 1.00E-06  | 38.6      |
| LOC_0601018280.1(1392*(1)1637/700/874/1057/1188/1387/1482)                                                                                                          | S803001650(637/700/874/1057/1188/1357/1487/1)                                                                                                                       | AT3062080.1(637/700/874/1057/1188/1357/1487/1)                                                                                        | 392(new)                                                    | LOC_0601018280.1.intron.1  | LOC_0601018280.1.exon.1 | 62.35      | 260     | 361   | 277     | 378      | 7.00E-21  | 76.7      |
|                                                                                                                                                                     |                                                                                                                                                                     |                                                                                                                                       |                                                             | LOC_0601018280.1.intron.1  | LOC_0601018280.1.exon.1 | 60         | 128     | 186   | 178     | 216      | 7.00E-21  | 76.7      |
|                                                                                                                                                                     |                                                                                                                                                                     |                                                                                                                                       |                                                             | LOC_0601018280.1.intron.1  | LOC_0601018280.1.exon.1 | 58.24      | 287     | 287   | 280     | 280      | 3.00E-20  | 76.7      |
|                                                                                                                                                                     |                                                                                                                                                                     |                                                                                                                                       |                                                             | LOC_0601018280.1.intron.1  | LOC_0601018280.1.exon.1 | 71.43      | 81      | 19    | 224     | 2.00E-20 | 76.7      |           |
|                                                                                                                                                                     |                                                                                                                                                                     |                                                                                                                                       |                                                             | LOC_0601018280.1.intron.1  | LOC_0601018280.1.exon.1 | 67.5       | 78      | 165   | 110     | 215      | 1.00E-18  | 81.6      |
|                                                                                                                                                                     |                                                                                                                                                                     |                                                                                                                                       |                                                             | LOC_0601018280.1.exon.1    | LOC_0601018280.1.exon.1 | 100        | 390     | 391   | 816     | 177      | 3.00E-10  | 46.6      |
| LOC_060641760.1(1273*(1)11183/1222*(3)1288/1412/1644/1807/1928/2022/2101/2260/2350/2484/2644/2738/2941/3067/3205/3369/3373/3442/3604/3668/3756/3859/3925/4067/4159) | ESTEXT_ORN601081100.C.CHW_107133(1183/1288/1412/1644/1807/1928/2022/2101/2260/2350/2484/2644/2738/2941/3067/3205/3369/3373/3442/3604/3668/3756/3859/3925/4067/4159) | AT4010320.1(11183/1288/1810/1924/2022/2101/2260/2350/2484/2644/2738/2941/3067/3205/3369/3373/3442/3604/3668/3756/3859/3925/4067/4159) | 1222(new/est);273(new/est)                                  | LOC_060641760.1.exon.2     | LOC_060641760.1.exon.2  | 76.92      | 318     | 280   | 357     | 319      | 3.00E-66  | 151       |
| LOC_060642730.1(1330/367/604/652/1137*(5)1)                                                                                                                         | AT5014390.1(1330/367/604/652)                                                                                                                                       | ESTEXT_PGRNESL_PG.C.L10009(330/367/604/652/1)                                                                                         | 1137(new/est)                                               | LOC_060642730.1.exon.5     | LOC_060642730.1.exon.5  | 57.89      | 319     | 375   | 241     | 297      | 4.00E-09  | 27.4      |
| LOC_0603041418.1(1425/514*(2)1640*(3)1399*(4)1)                                                                                                                     | PGRNESL_PG.C.CHW_9000030(424)                                                                                                                                       | AT1047710.1(424)                                                                                                                      | 2399(new);611(new);640(new)                                 | LOC_0603041418.1.exon.4    | LOC_0603041418.1.exon.5 | 60.9       | 1       | 597   | 1       | 597      | 5.00E-121 | 56.1      |
|                                                                                                                                                                     |                                                                                                                                                                     |                                                                                                                                       |                                                             | LOC_0603041418.1.exon.4    | LOC_0603041418.1.exon.5 | 60.8       | 48      | 141   | 801     | 896      | 3.00E-22  | 76.8      |
|                                                                                                                                                                     |                                                                                                                                                                     |                                                                                                                                       |                                                             | LOC_0603041418.1.exon.5    | LOC_0603041418.1.exon.5 | 100        | 1       | 47    | 952     | 800      | 3.00E-22  | 76.8      |
| LOC_0603055704.1(1323*(1)1)                                                                                                                                         | S803001970(1)                                                                                                                                                       | AT5066950.1(1)                                                                                                                        | 323(new)                                                    | LOC_0603055704.1.intron.1  | LOC_0603055704.1.exon.1 | 61.82      | 72      | 137   | 248     | 311      | 1.00E-13  | 46.4      |
|                                                                                                                                                                     |                                                                                                                                                                     |                                                                                                                                       |                                                             | LOC_0603055704.1.intron.1  | LOC_0603055704.1.exon.1 | 63.33      | 33      | 77    | 208     | 212      | 1.00E-13  | 45.5      |
| LOC_0602050174.1(1110*(1)17236*(2)732*(3)1530*(4)1665/751/846/972)                                                                                                  | E_GMI_4_16471.1(1665/751/846/972)                                                                                                                                   | AT1070680.1(1287/665/751/846/972)                                                                                                     | 110(dup);est1236(dup);est1321(new);est1830(new)             | LOC_0602050174.1.exon.1    | LOC_0602050174.1.exon.4 | 60         | 275     | 201   | 204     | 130      | 3.00E-07  | 40.5      |
|                                                                                                                                                                     |                                                                                                                                                                     |                                                                                                                                       |                                                             | LOC_0602050174.1.exon.2    | LOC_0602050174.1.exon.5 | 60.77      | 48      | 125   | 67      | 114      | 4.00E-15  | 52.8      |
|                                                                                                                                                                     |                                                                                                                                                                     |                                                                                                                                       |                                                             | LOC_0602050174.1.exon.2    | LOC_0602050174.1.exon.5 | 76.47      | 10      | 80    | 19      | 69       | 4.00E-10  | 48.3      |
|                                                                                                                                                                     |                                                                                                                                                                     |                                                                                                                                       |                                                             | LOC_0602050174.1.exon.1    | LOC_0602050174.1.exon.6 | 63.74      | 16      | 88    | 68      | 68       | 3.00E-13  | 41        |
|                                                                                                                                                                     |                                                                                                                                                                     |                                                                                                                                       |                                                             | LOC_0602050174.1.intron.3  | LOC_0602050174.1.exon.9 | 64         | 5752    | 5603  | 237     | 88       | 1.00E-15  | 73.9      |
|                                                                                                                                                                     |                                                                                                                                                                     |                                                                                                                                       |                                                             | LOC_0602050174.1.intron.3  | LOC_0602050174.1.exon.7 | 82.61      | 5494    | 5562  | 22      | 90       | 1.00E-07  | 47.3      |
| LOC_0607069920.1(1024*(1)1)                                                                                                                                         | PGRNESL_PG.C.CHW_3000223(1)                                                                                                                                         | AT3029710.1(1)                                                                                                                        | 1024(new)                                                   | LOC_0607069920.1.exon.1    | LOC_0607069920.1.exon.2 | 65.42      | 322     | 819   | 163     | 660      | 1.00E-73  | 214       |
|                                                                                                                                                                     |                                                                                                                                                                     |                                                                                                                                       |                                                             | LOC_0607069920.1.exon.1    | LOC_0607069920.1.exon.2 | 63.04      | 163     | 163   | 118     | 118      | 3.00E-73  | 93.5      |
|                                                                                                                                                                     |                                                                                                                                                                     |                                                                                                                                       |                                                             | LOC_0607069920.1.intron.1  | LOC_0607069920.1.exon.2 | 67.74      | 1       | 83    | 829     | 921      | 2.00E-14  | 83.4      |
| LOC_0604054020.1(11349/1490/1467/1684/1895/1895/1817/2133/2294/2559*(7)2632*(8)2643*(9)2962*(10)1)                                                                  | E_GMI_6_16380.1(11349/1496/1684/1895/2133/2294/2559)                                                                                                                | AT4021380.1(11349/1490/1684/1895/2133/2284)                                                                                           | 2862(dup);2559(new);2632(new);2962(new)                     | LOC_0604054020.1.exon.4    | LOC_0604054020.1.exon.9 | 66.36      | 1       | 132   | 1       | 132      | 1.00E-21  | 85.4      |
|                                                                                                                                                                     |                                                                                                                                                                     |                                                                                                                                       |                                                             | LOC_0604054020.1.exon.6    | LOC_0604054020.1.exon.1 | 71.43      | 38      | 121   | 6       | 89       | 2.00E-10  | 48.3      |
|                                                                                                                                                                     |                                                                                                                                                                     |                                                                                                                                       |                                                             | LOC_0604054020.1.exon.7    | LOC_0604054020.1.exon.1 | 64.86      | 1       | 222   | 1       | 222      | 4.00E-30  | 119       |
|                                                                                                                                                                     |                                                                                                                                                                     |                                                                                                                                       |                                                             | LOC_0604054020.1.intron.2  | LOC_0604054020.1.exon.5 | 79.22      | 124     | 354   | 6       | 216      | 1.00E-40  | 150       |
|                                                                                                                                                                     |                                                                                                                                                                     |                                                                                                                                       |                                                             | LOC_0604054020.1.intron.7  | LOC_0604054020.1.exon.9 | 83.33      | 6       | 77    | 119     | 210      | 5.00E-12  | 84.2      |
| LOC_060305310.1(722*(1)1)                                                                                                                                           | ESTEXT_PGRNESL_PG.C.CHW_11471(1)                                                                                                                                    | AT5065860.2(1)                                                                                                                        | 722(new/est)                                                | LOC_060305310.1.exon.1     | LOC_060305310.1.exon.1  | 47.87      | 208     | 264   | 303     | 357      | 2.00E-15  | 36.3      |
| LOC_060938510.1(89*(1)1)                                                                                                                                            | S802032510(1)                                                                                                                                                       | AT3024220.1(1)                                                                                                                        | 89(new/est)                                                 | LOC_060938510.1.exon.2     | LOC_060938510.1.exon.2  | 47.06      | 928     | 878   | 843     | 793      | 3.00E-52  | 21.7      |
| LOC_061103980.1(457*(1)1)                                                                                                                                           | AT5021274.1(95)                                                                                                                                                     | E_GMI_5_854.1(95)                                                                                                                     | 457(new)                                                    | LOC_061103980.1.exon.1     | LOC_061103980.1.exon.1  | 46.67      | 91      | 235   | 310     | 444      | 2.00E-32  | 82.6      |

|                                                                                                                                                                                        |                                                                                                                                                                                |                                                                                                                                                 |                                                                                   |                            |                              |       |       |       |      |          |          |       |
|----------------------------------------------------------------------------------------------------------------------------------------------------------------------------------------|--------------------------------------------------------------------------------------------------------------------------------------------------------------------------------|-------------------------------------------------------------------------------------------------------------------------------------------------|-----------------------------------------------------------------------------------|----------------------------|------------------------------|-------|-------|-------|------|----------|----------|-------|
| L0C_0e07g27790.1(226*(11)232*(2))504*655;763;856;940;1009;1080<br>150;1403;1009;1080;1249;1243;1333;1414;1507;1588<br>1658;1)                                                          | R_GML_9_327.1(1504;655;763;856;940;1009;1080<br>13149;1243;1333;1414;1507;1588;1658;1)                                                                                         | AT4023100.1(1504;655;763;856;940;1009;1080;1<br>149;1243;1333;1414;1507;1588;1658;1)                                                            | 226(new;rest:232(new;rest<br>1)                                                   | L0C_0e07g27790.1.exon.1    | L0C_0e07g27790.1.exon.1      | 75    | 173   | 138   | 114  | 79       | 8,000-13 | 45.5  |
| L0C_0e04g2900.1(1334*516;1596;716;831;912;937;9<br>94;1060;1150;1243;1338;1488;1579;1747;1888;209<br>5;2194;2347;2431*(20))281;2992;3316;4073;4195<br>14441;4543;4865;1)               | ESTXAT_GENNEWDB1PL08_C_CHR_47681(1341516;95<br>6;716;831;912;937;994;1060;1150;1243;1338;1<br>488;1579;1747;1888;2095;2194;2347;2811;2992<br>73316;4073;4195;4441;4543;4865;1) | AT2034660.1(1334;513;556;716;831;912;937;994<br>1060;1150;1243;1338;1488;1579;1747;1888;20<br>95;2194;2347;2811;2992;3316;4195;4441;4865;<br>7) | 2413(new;1)                                                                       | L0C_0e04g2900.1.exon.19    | L0C_0e04g2900.1.exon.2<br>6  | 35.9  | 19    | 135   | 1    | 117      | 2,000-06 | 36.5  |
| L0C_0e07g47410.1(1925*(11)1750*1769*(3)1787;19<br>231;1)                                                                                                                               | AT3082770.2(11507;153211793;17901923;1)<br>1)                                                                                                                                  | ESTXAT_GENNEWDB1_C_CHR_30985(11507;17901923;1<br>1)                                                                                             | 1769(new;rest:1925(new;1<br>1)                                                    | L0C_0e07g47410.1.exon.1    | L0C_0e07g47410.1.exon.2      | 47.62 | 659   | 744   | 454  | 579      | 4,000-10 | 49.6  |
| L0C_0e07g03890.1(1798*(11)1852*(2)1)                                                                                                                                                   | PERNSB1_PG_C_CHR_10001242(1)                                                                                                                                                   | AT2027710.1(1)                                                                                                                                  | 1798(new;11852(new;1)                                                             | L0C_0e07g03890.1.exon.1    | L0C_0e07g03890.1.exon.3      | 65.1  | 295   | 1764  | 271  | 1740     | 0        | 807   |
|                                                                                                                                                                                        |                                                                                                                                                                                |                                                                                                                                                 |                                                                                   | L0C_0e07g03890.1.exon.1    | L0C_0e07g03890.1.exon.3      | 58.33 | 55    | 270   | 34   | 249      | 0        | 313   |
|                                                                                                                                                                                        |                                                                                                                                                                                |                                                                                                                                                 |                                                                                   | L0C_0e07g03890.1.intron.2  | L0C_0e07g03890.1.exon.3      | 61.02 | 4     | 180   | 8744 | 1950     | 5,000-23 | 92.3  |
| L0C_0e04g39030.1(1105;4;126;454;1026*(4)1)                                                                                                                                             | AT3032670.1(11276;1454;1)                                                                                                                                                      | ESTXAT_GENNEWDB1_PG_C_CHR_31826(45;1026;454;1)<br>1)                                                                                            | 1026(new;1)                                                                       | L0C_0e04g39030.1.exon.5    | L0C_0e04g39030.1.exon.5      | 75    | 555   | 630   | 373  | 608      | 5,000-13 | 43.7  |
| L0C_0e11g03270.1(1352;415*(7)1544;601;900;993;1<br>210;1400;1495*(8)1552*(10)1607*(11)1)                                                                                               | SB050070001(352;544;601;694;900;993;1210;14<br>90;1)                                                                                                                           | AT5018280.1(1352;544;601;694;900;993;1210;14<br>90;1)                                                                                           | 1495(new;1552(new;1607(new<br>1415(new;1)                                         | L0C_0e11g03270.1.exon.4    | L0C_0e11g03270.1.exon.1<br>9 | 67.5  | 3     | 50    | 3    | 50       | 2,000-08 | 40.5  |
|                                                                                                                                                                                        |                                                                                                                                                                                |                                                                                                                                                 |                                                                                   | L0C_0e11g03270.1.exon.6    | L0C_0e11g03270.1.exon.1<br>9 | 64.12 | 38    | 88    | 1    | 91       | 6,000-09 | 42.8  |
|                                                                                                                                                                                        |                                                                                                                                                                                |                                                                                                                                                 |                                                                                   | L0C_0e11g03270.1.exon.9    | L0C_0e11g03270.1.exon.1<br>9 | 74.19 | 3     | 95    | 3    | 95       | 5,000-13 | 56.3  |
|                                                                                                                                                                                        |                                                                                                                                                                                |                                                                                                                                                 |                                                                                   | L0C_0e11g03270.4.intron.9  | L0C_0e11g03270.1.exon.3      | 62.79 | 800   | 672   | 129  | 1        | 1,000-13 | 82.5  |
|                                                                                                                                                                                        |                                                                                                                                                                                |                                                                                                                                                 |                                                                                   | L0C_0e11g03270.4.intron.10 | L0C_0e11g03270.1.exon.9      | 29.28 | 192   | 431   | 58   | 1        | 1,000-41 | 112   |
|                                                                                                                                                                                        |                                                                                                                                                                                |                                                                                                                                                 |                                                                                   | L0C_0e11g03270.4.intron.10 | L0C_0e11g03270.1.exon.9      | 60.79 | 157   | 119   | 1    | 63       | 1,000-45 | 115.9 |
|                                                                                                                                                                                        |                                                                                                                                                                                |                                                                                                                                                 |                                                                                   | L0C_0e11g03270.4.intron.11 | L0C_0e11g03270.1.exon.9      | 75.86 | 355   | 441   | 94   | 180      | 3,000-23 | 98.3  |
|                                                                                                                                                                                        |                                                                                                                                                                                |                                                                                                                                                 |                                                                                   | L0C_0e11g03270.4.intron.11 | L0C_0e11g03270.1.exon.8      | 76.92 | 270   | 347   | 1    | 78       | 3,000-23 | 53.1  |
| L0C_0e07g03760.1(1311;312;388*(3);495*(4)1577;<br>90;973;1)                                                                                                                            | AT5023540.1(1117312;477;790;973;1)<br>1)                                                                                                                                       | ESTXAT_GENNEWDB1PL08_C_CHR_22208(1117312;47<br>7;790;973;1)                                                                                     | 388(new;495(new;1)                                                                | L0C_0e07g03760.1.intron.5  | L0C_0e07g03760.1.exon.3      | 68.42 | 343   | 287   | 74   | 18       | 6,000-06 | 35    |
| L0C_0e09g41040.1(487;1210*(3)1)                                                                                                                                                        | SB03006970(487;1)                                                                                                                                                              | AT5048930.1(487;1)                                                                                                                              | 1210(new;rest:1)                                                                  | L0C_0e09g41040.1.exon.2    | L0C_0e09g41040.1.exon.2      | 66.36 | 161   | 166   | 35   | 100      | 5,000-11 | 51.9  |
| L0C_0e04g18030.1(1389*(11)1508*(2))774*(3)813*(4)<br>1)1260;1265;1342*(7)1415;1494;1585;1640;1675<br>1804;1936;2080;2164;2251;2298*(18);2395;2521;<br>2620;2740;2818;3021;3112;3202;1) | ESTXAT_GENNEWDB1_C_CHR_61061(1180;1246;1415<br>1444;1545;1641;1675;1804;1936;2080;2179;22<br>53;2395;2521;2620;2740;2818;3021;3112;3202;<br>1)                                 | AT1012360.1(1180;1246;1415;1494;1545;1642;1<br>675;1804;1936;2080;2179;2253;2395;2521;2620<br>2740;2818;3021;3112;3202;1)                       | 1342(new;rest:2398(new;389(n<br>ew;rest:550(new;rest:774(new;1<br>813(new;rest:1) | L0C_0e04g18030.1.exon.5    | L0C_0e04g18030.1.exon.5      | 94.21 | 148   | 204   | 5    | 61       | 2,000-11 | 45.5  |
| L0C_0e03g30200.1(1678*(1)1)                                                                                                                                                            | ESTXAT_GENNEWDB1PL08_C_CHR_210274(1)                                                                                                                                           | AT1020350.1(1)                                                                                                                                  | 278(new;rest:1)                                                                   | L0C_0e03g30200.1.exon.1    | L0C_0e03g30200.1.exon.1      | 42.86 | 470   | 388   | 326  | 1,000-34 | 105      |       |
| L0C_0e07g34370.1(11350*(4)13440*(2)1)                                                                                                                                                  | OMI_2_408.1(1)                                                                                                                                                                 | AT1047480.1(1390;1)                                                                                                                             | 1351(new;1440(new;1)                                                              | L0C_0e07g34370.1.exon.1    | L0C_0e07g34370.1.exon.3      | 88.87 | 292   | 396   | 2    | 106      | 1,000-18 | 76.7  |
|                                                                                                                                                                                        |                                                                                                                                                                                |                                                                                                                                                 |                                                                                   | L0C_0e07g34370.1.intron.1  | L0C_0e07g34370.1.exon.3      | 84.21 | 19    | 75    | 232  | 288      | 5,000-10 | 45.5  |
| L0C_0e01g02080.1(170*(1)179;127)439;629;656;810<br>859;974;1066;1223;1386;1492;1)                                                                                                      | ESTXAT_GENNEWDB1_PG_C_CHR_33373(439;629;656;<br>810;859;974;1066;1223;1386;1492;1)                                                                                             | AT1033570.1(448;629;656;810;859;974;1066;12<br>23;1386;1492;1)                                                                                  | 70(new;79(new;1)                                                                  | L0C_0e01g02080.1.exon.3    | L0C_0e01g02080.1.exon.3      | 88.89 | 111   | 157   | 100  | 126      | 2,000-52 | 126   |
| L0C_0e09g37390.1(288*(11)423*(2)1)                                                                                                                                                     | R_GML_9_35999.1(1)                                                                                                                                                             | AT1029430.1(1)                                                                                                                                  | 288(new;423(new;1)                                                                | L0C_0e09g37390.1.exon.1    | L0C_0e09g37390.1.exon.3      | 71.53 | 115   | 285   | 140  | 310      | 2,000-30 | 100   |
|                                                                                                                                                                                        |                                                                                                                                                                                |                                                                                                                                                 |                                                                                   | L0C_0e09g37390.1.exon.3    | L0C_0e09g37390.1.exon.3      | 63.16 | 1     | 23    | 67   | 23       | 2,000-30 | 82.3  |
|                                                                                                                                                                                        |                                                                                                                                                                                |                                                                                                                                                 |                                                                                   | L0C_0e09g37390.1.intron.1  | L0C_0e09g37390.1.exon.3      | 65.81 | 2     | 130   | 314  | 442      | 1,000-11 | 54.7  |
| L0C_0e04g52614.1(1125;315;387;459;531;603;675;7<br>47;819;968;1170;1260;1672;1874;2108;2227;2438;<br>2670;2822;2935*(20)1)                                                             | ESTXAT_GENNEWDB1_C_CHR_67621(125;315;387;45<br>9;531;603;675;747;819;968;1170;1260;1672;1874;<br>2108;2227;2438;2670;2822;1)                                                   | AT1061440.1(1125;315;387;459;531;603;675;747<br>819;968;1170;1260;1672;1874;2108;2227;2438;<br>2670;2822;1)                                     | 2935(new;rest:1)                                                                  | L0C_0e04g52614.1.intron.1  | L0C_0e04g52614.1.exon.1<br>3 | 79.65 | 11315 | 11653 | 42   | 380      | 2,000-59 | 220   |
|                                                                                                                                                                                        |                                                                                                                                                                                |                                                                                                                                                 |                                                                                   | L0C_0e04g52614.1.intron.1  | L0C_0e04g52614.1.exon.1<br>3 | 88.89 | 11305 | 11279 | 29   | 3        | 2,000-51 | 188   |
|                                                                                                                                                                                        |                                                                                                                                                                                |                                                                                                                                                 |                                                                                   | L0C_0e04g52614.1.intron.1  | L0C_0e04g52614.1.exon.1<br>3 | 92.11 | 13088 | 13312 | 3    | 230      | 2,000-42 | 164   |
|                                                                                                                                                                                        |                                                                                                                                                                                |                                                                                                                                                 |                                                                                   | L0C_0e04g52614.1.intron.1  | L0C_0e04g52614.1.exon.1      | 92.86 | 12778 | 12987 | 1    | 210      | 2,000-40 | 157   |
|                                                                                                                                                                                        |                                                                                                                                                                                |                                                                                                                                                 |                                                                                   | L0C_0e04g52614.1.intron.1  | L0C_0e04g52614.1.exon.1      | 86.57 | 11745 | 11945 | 1    | 201      | 1,000-37 | 148   |
|                                                                                                                                                                                        |                                                                                                                                                                                |                                                                                                                                                 |                                                                                   | L0C_0e04g52614.1.intron.1  | L0C_0e04g52614.1.exon.1      | 91.84 | 13904 | 13950 | 2    | 148      | 1,000-26 | 111   |
|                                                                                                                                                                                        |                                                                                                                                                                                |                                                                                                                                                 |                                                                                   | L0C_0e04g52614.1.intron.1  | L0C_0e04g52614.1.exon.2      | 84.65 | 5     | 103   | 4    | 102      | 2,000-21 | 68.9  |
|                                                                                                                                                                                        |                                                                                                                                                                                |                                                                                                                                                 |                                                                                   | L0C_0e04g52614.1.intron.1  | L0C_0e04g52614.1.exon.1      | 89.74 | 12247 | 12463 | 3    | 119      | 2,000-18 | 84.5  |
|                                                                                                                                                                                        |                                                                                                                                                                                |                                                                                                                                                 |                                                                                   | L0C_0e04g52614.1.intron.1  | L0C_0e04g52614.1.exon.2      | 78.38 | 14024 | 14134 | 1    | 111      | 3,000-15 | 73.9  |
|                                                                                                                                                                                        |                                                                                                                                                                                |                                                                                                                                                 |                                                                                   | L0C_0e04g52614.1.intron.1  | L0C_0e04g52614.1.exon.2      | 75.86 | 4539  | 4326  | 27   | 113      | 2,000-14 | 58.8  |
|                                                                                                                                                                                        |                                                                                                                                                                                |                                                                                                                                                 |                                                                                   | L0C_0e04g52614.1.intron.1  | L0C_0e04g52614.1.exon.8      | 100   | 4589  | 4424  | 2    | 67       | 1,000-11 | 82    |
|                                                                                                                                                                                        |                                                                                                                                                                                |                                                                                                                                                 |                                                                                   | L0C_0e04g52614.1.intron.1  | L0C_0e04g52614.1.exon.8      | 65.65 | 5614  | 5662  | 2    | 70       | 2,000-09 | 54.7  |
|                                                                                                                                                                                        |                                                                                                                                                                                |                                                                                                                                                 |                                                                                   | L0C_0e04g52614.1.intron.1  | L0C_0e04g52614.1.exon.1      | 70.97 | 1885  | 1877  | 23   | 115      | 4,000-08 | 48.7  |
|                                                                                                                                                                                        |                                                                                                                                                                                |                                                                                                                                                 |                                                                                   | L0C_0e04g52614.1.intron.1  | L0C_0e04g52614.1.exon.4      | 81.82 | 5457  | 5522  | 2    | 67       | 2,000-07 | 48.3  |
|                                                                                                                                                                                        |                                                                                                                                                                                |                                                                                                                                                 |                                                                                   | L0C_0e04g52614.1.intron.1  | L0C_0e04g52614.1.exon.9      | 78.28 | 6924  | 6992  | 2    | 70       | 4,000-07 | 46.9  |
|                                                                                                                                                                                        |                                                                                                                                                                                |                                                                                                                                                 |                                                                                   | L0C_0e04g52614.1.intron.1  | L0C_0e04g52614.1.exon.7      | 70.83 | 6205  | 6276  | 1    | 72       | 3,000-06 | 45.3  |
|                                                                                                                                                                                        |                                                                                                                                                                                |                                                                                                                                                 |                                                                                   | L0C_0e04g52614.1.intron.1  | L0C_0e04g52614.1.exon.1      | 76    | 7348  | 7274  | 75   | 1        | 5,000-06 | 43.2  |
| L0C_0e01g03170.1(217;924*(2)1235*(3)1)                                                                                                                                                 | ESTXAT_GENNEWDB1_PG_C_CHR_30842(1217;1)                                                                                                                                        | AT5037870.1(1217;1)                                                                                                                             | 1235(dup;1924(new;1)                                                              | L0C_0e01g03170.1.exon.2    | L0C_0e01g03170.1.exon.4      | 34.55 | 82    | 246   | 70   | 234      | 2,000-10 | 51    |
|                                                                                                                                                                                        |                                                                                                                                                                                |                                                                                                                                                 |                                                                                   | L0C_0e01g03170.1.exon.2    | L0C_0e01g03170.1.exon.2      | 46.15 | 383   | 460   | 17   | 94       | 8,000-11 | 23.1  |
| L0C_0e06g44890.1(173*(1)195;295;364;607;785;918;1081;1<br>138;1329;1330;1486;1555;1624;1762;1891;2039;2050;<br>2080;2191;2320;2386;2726;2965;1)                                        | SB100026330(195;295;364;607;785;918;1081;13<br>8;1330;1486;1555;1624;1762;1891;2039;2050;<br>2080;2191;2320;2386;2726;2965;1)                                                  | AT4010160.1(195;295;364;607;785;918;1081;13<br>8;1330;1486;1555;1624;1762;1891;2039;2050;<br>2191;2320;2386;2726;2965;1)                        | 73(new;rest:1)                                                                    | L0C_0e06g44890.1.exon.10   | L0C_0e06g44890.1.exon.1      | 90    | 107   | 78    | 227  | 198      | 6,000-22 | 25.8  |
| L0C_0e03g3788.1(178*(1)1)                                                                                                                                                              | ESTXAT_GENNEWDB1_C_CHR_70942(4)1)                                                                                                                                              | AT1013830.2(1)                                                                                                                                  | 178(new;rest:1)                                                                   | L0C_0e03g3788.1.exon.1     | L0C_0e03g3788.1.exon.1       | 100   | 1     | 80    | 89   | 4,000-21 | 71.9     |       |
| L0C_0e03g46100.1(1539*(11)725;796*(11)1)                                                                                                                                               | SB010005440(725;796*(11)1)                                                                                                                                                     | AT3022640.1(725;796*(11)1489;1)                                                                                                                 | 539(new;rest:1)                                                                   | L0C_0e03g46100.1.exon.1    | L0C_0e03g46100.1.exon.1      | 41.94 | 104   | 410   | 502  | 8,000-06 | 34.2     |       |
| L0C_0e05g40790.1(1177;43;310;482;792;849;905;10<br>971;1096;1171;1317;1370;1812;1967;2068*(14);248<br>4*(15)1)                                                                         | ESTXAT_GENNEWDB1_PG_C_CHR_90406(37;143;310;6<br>89;905;1007;1063;1137;1317;1370;1812;1967;1)                                                                                   | AT6059710.1(310;489;905;1007;1096;1177;1717<br>1370;1812;1967;1)                                                                                | 2068(new;1249(new;1)                                                              | L0C_0e05g40790.1.exon.10   | L0C_0e05g40790.1.exon.1      | 70.37 | 241   | 321   | 133  | 213      | 7,000-10 | 49.5  |
|                                                                                                                                                                                        |                                                                                                                                                                                |                                                                                                                                                 |                                                                                   | L0C_0e05g40790.1.exon.15   | L0C_0e05g40790.1.exon.1      | 43.78 | 281   | 328   | 347  | 394      | 6,000-18 | 22.1  |
| L0C_0e08g08140.1(1335*(11)1503*(2))785*(3)813*(4)<br>1)957;1161;1005*(6)1237;1441;2668;2879;3117;32<br>1(1)                                                                            | R_GML_11_4912.1(1237;2371;2668;2879;3117;327<br>1;1)                                                                                                                           | AT4011390.1(1243;1268;1289;1317;3271(1)<br>1)                                                                                                   | 785(dup;1005(new;735(new;1<br>803(new;943(new;957(new;1)                          | L0C_0e08g08140.1.exon.1    | L0C_0e08g08140.1.exon.7      | 34.65 | 91    | 288   | 698  | 895      | 2,000-14 | 52.4  |
|                                                                                                                                                                                        |                                                                                                                                                                                |                                                                                                                                                 |                                                                                   | L0C_0e08g08140.1.exon.2    | L0C_0e08g08140.1.exon.7      | 58.38 | 6     | 101   | 1061 | 1156     | 3,000-13 | 51.9  |
|                                                                                                                                                                                        |                                                                                                                                                                                |                                                                                                                                                 |                                                                                   | L0C_0e08g08140.1.exon.3    | L0C_0e08g08140.1.exon.1      | 78.32 | 30    | 160   | 6    | 316      | 3,000-33 | 165   |
|                                                                                                                                                                                        |                                                                                                                                                                                |                                                                                                                                                 |                                                                                   | L0C_0e08g08140.1.exon.4    | L0C_0e08g08140.1.exon.1      | 82.35 | 2     | 52    | 2    | 52       | 2,000-12 | 55.9  |
|                                                                                                                                                                                        |                                                                                                                                                                                |                                                                                                                                                 |                                                                                   | L0C_0e08g08140.1.intron.2  | L0C_0e08g08140.1.exon.1      | 82.22 | 1084  | 1198  | 76   | 210      | 4,000-30 | 95.9  |

|                                                                                                                                 |                                                                                                            |                                                                                                                |                                                                          |                            |                         |       |          |      |      |          |           |       |
|---------------------------------------------------------------------------------------------------------------------------------|------------------------------------------------------------------------------------------------------------|----------------------------------------------------------------------------------------------------------------|--------------------------------------------------------------------------|----------------------------|-------------------------|-------|----------|------|------|----------|-----------|-------|
|                                                                                                                                 |                                                                                                            |                                                                                                                |                                                                          | LOC_0a09g08140.1.instron.2 | 9                       | 68.38 | 990      | 1067 | 1    | 70       | 4,000-50  | 86.3  |
|                                                                                                                                 |                                                                                                            |                                                                                                                |                                                                          | LOC_0a09g08140.1.instron.7 | LOC_0a09g08140.1.exon.1 | 68.58 | 769      | 891  | 60   | 182      | 3,000-14  | 86.7  |
|                                                                                                                                 |                                                                                                            |                                                                                                                |                                                                          | LOC_0a09g08140.1.instron.4 | LOC_0a09g08140.1.exon.3 | 67.45 | 283      | 383  | 1    | 141      | 2,000-15  | 71.2  |
| LOC_0a02g29220.1(215*(1+1280*(2)+448+559))                                                                                      | SB06016950(448+559)                                                                                        | AT017010.1(448+559)                                                                                            | 215(new 280(new))                                                        | LOC_0a02g29220.1.instron.1 | LOC_0a02g29220.1.exon.1 | 85.19 | 84       | 164  | 134  | 214      | 7,000-06  | 35    |
|                                                                                                                                 |                                                                                                            |                                                                                                                |                                                                          | LOC_0a02g29220.1.exon.1    | LOC_0a02g29220.1.exon.1 | 90    | 84       | 123  | 3    | 62       | 6,000-10  | 47.8  |
| LOC_0a06g12060.1(123*(1+1280*(2)+1342*(3)))                                                                                     | SB040091820(1)                                                                                             | AT1011150.1(1)                                                                                                 | 123(new 128(new) 1342(new))                                              | LOC_0a06g12060.1.exon.1    | LOC_0a06g12060.1.exon.4 | 74.87 | 109      | 2158 | 238  | 1287     | 2,000-178 | 588   |
|                                                                                                                                 |                                                                                                            |                                                                                                                |                                                                          | LOC_0a06g12060.1.exon.1    | LOC_0a06g12060.1.exon.4 | 59.09 | 34       | 99   | 178  | 243      | 2,000-178 | 318   |
|                                                                                                                                 |                                                                                                            |                                                                                                                |                                                                          | LOC_0a06g12060.1.instron.3 | LOC_0a06g12060.1.exon.2 | 72.73 | 2        | 87   | 1345 | 2,000-12 | 46.4      |       |
| LOC_0a02g25910.1(1195*(1+1265+375+466))                                                                                         | AT5010980.1(1268+466)                                                                                      | ESTTEXT_PGENRESL_PG_C_CHR_60083(268+375+466)                                                                   | 195(new)                                                                 | LOC_0a02g25910.1.exon.1    | LOC_0a02g25910.1.exon.1 | 100   | 143      | 169  | 79   | 105      | 5,000-21  | 76.2  |
| LOC_0a03g48524.1(1375*(1+1375*(2)))                                                                                             | ESTTEXT_PGENRESL_PG_C_CHR_10448(1)                                                                         | AT5049280.1(1)                                                                                                 | 1375(new new 375(new))                                                   | LOC_0a03g48524.1.exon.1    | LOC_0a03g48524.1.exon.2 | 81.76 | 75       | 333  | 678  | 830      | 1,000-68  | 154   |
|                                                                                                                                 |                                                                                                            |                                                                                                                |                                                                          | LOC_0a03g48524.1.exon.1    | LOC_0a03g48524.1.exon.2 | 86    | 1        | 75   | 585  | 869      | 3,000-64  | 144   |
| LOC_0a03g07130.2(140+371+776+1203*(5))                                                                                          | PGENRESL_PG_C_CHR_800555(140+371+776+1517)                                                                 | AT101980.1(140+371+776)                                                                                        | 1203(new new)                                                            | LOC_0a03g07130.2.exon.6    | LOC_0a03g07130.2.exon.6 | 91.3  | 202      | 334  | 274  | 406      | 7,000-10  | 49.2  |
| LOC_0a08g14700.1(74+146*(2)+1717(7))                                                                                            | PGENRESL_PG_C_CHR_200302(74+1717)                                                                          | AT2005790.1(74+1717)                                                                                           | 146(dup new)                                                             | LOC_0a08g14700.1.exon.2    | LOC_0a08g14700.1.exon.3 | 88.82 | 1055     | 1284 | 6    | 242      | 9,000-37  | 138   |
| LOC_0a03g1810.1(3315(1*(2)))                                                                                                    | SB02003190(123+880)                                                                                        | AT1010870.1(123)                                                                                               | 311(new new)                                                             | LOC_0a03g1810.1.exon.1     | LOC_0a03g1810.1.exon.3  | 34    | 593      | 477  | 267  | 173      | 2,000-41  | 134   |
| LOC_0a09g38830.1(1455*(1+1178*(2)+1861*(3)+2851/2948+1211*(5)))                                                                 | PGENRESL_PG_C_CHR_30062(12948+3101)                                                                        | AT1021270.1(12948+3125)                                                                                        | 1786(new 1861(new) 3211(new 1455(new))                                   | LOC_0a09g38830.1.exon.1    | LOC_0a09g38830.1.exon.4 | 89.77 | 520      | 448  | 880  | 1008     | 9,000-34  | 78.9  |
|                                                                                                                                 |                                                                                                            |                                                                                                                |                                                                          | LOC_0a09g38830.1.exon.1    | LOC_0a09g38830.1.exon.4 | 83.85 | 488      | 528  | 800  | 878      | 9,000-34  | 54.2  |
|                                                                                                                                 |                                                                                                            |                                                                                                                |                                                                          | LOC_0a09g38830.1.exon.1    | LOC_0a09g38830.1.exon.4 | 83.25 | 359      | 358  | 130  | 188      | 9,000-34  | 54.2  |
|                                                                                                                                 |                                                                                                            |                                                                                                                |                                                                          | LOC_0a09g38830.1.exon.2    | LOC_0a09g38830.1.exon.2 | 86.48 | 165      | 932  | 1    | 768      | 2,000-24  | 582   |
|                                                                                                                                 |                                                                                                            |                                                                                                                |                                                                          | LOC_0a09g38830.1.instron.1 | LOC_0a09g38830.1.exon.5 | 80.28 | 95       | 241  | 26   | 197      | 2,000-24  | 277   |
|                                                                                                                                 |                                                                                                            |                                                                                                                |                                                                          | LOC_0a09g38830.1.instron.2 | LOC_0a09g38830.1.exon.6 | 89.71 | 3        | 84   | 973  | 1056     | 2,000-15  | 53.3  |
|                                                                                                                                 |                                                                                                            |                                                                                                                |                                                                          | LOC_0a09g38830.1.instron.5 | LOC_0a09g38830.1.exon.7 | 79.53 | 266      | 427  | 2    | 363      | 3,000-30  | 118   |
|                                                                                                                                 |                                                                                                            |                                                                                                                |                                                                          | LOC_0a09g38830.1.exon.2    | LOC_0a09g38830.1.exon.1 | 87.74 | 430      | 379  | 194  | 308      | 1,000-20  | 22.1  |
|                                                                                                                                 |                                                                                                            |                                                                                                                |                                                                          | 36                         | 3                       | 439   | 1,000-20 | 22.1 |      |          |           |       |
| LOC_0a08g1940.1(131190+247318+618+889590+694748+804+994+1182+1253+1326+1388+2319+2610)                                          | AT5049900.1(851190+247318+618+889590+694748+804+994+1182+1253+1326+1388+2319+2610)                         | SB02007160(190+247318+618+889590+694748+804+994+1182+1253+1326+1388+2319+2610)                                 | 1810(new new)                                                            | LOC_0a08g1940.1.exon.18    | LOC_0a08g1940.1.exon.1  | 85    | 504      | 383  | 129  | 184      | 1,000-49  | 21.7  |
| LOC_0a04g7430.1(169*(1))                                                                                                        | OMI_B_16898(1)                                                                                             | AT4006744.1(1)                                                                                                 | 169(new)                                                                 | LOC_0a04g7430.1.exon.2     | LOC_0a04g7430.1.exon.2  | 36.11 | 325      | 432  | 535  | 642      | 5,000-99  | 130   |
| LOC_0a08g31910.1(1375*(1+1484*(2)+419*(3)+588*(4)+288*(5)))                                                                     | ESTTEXT_PGENRESL_PG_C_CHR_52167(1281)                                                                      | AT1081600.1(1281)                                                                                              | 375(new 441(new) 510(new new 585(new) 881(new))                          | LOC_0a08g31910.1.exon.9    | LOC_0a08g31910.1.exon.6 | 89.23 | 119      | 196  | 109  | 186      | 4,000-10  | 60.1  |
|                                                                                                                                 |                                                                                                            |                                                                                                                |                                                                          | LOC_0a08g31910.1.instron.4 | LOC_0a08g31910.1.exon.2 | 82    | 78       | 252  | 2    | 76       | 1,000-11  | 57    |
|                                                                                                                                 |                                                                                                            |                                                                                                                |                                                                          | LOC_0a08g31910.1.instron.5 | LOC_0a08g31910.1.exon.1 | 84.17 | 454      | 423  | 83   | 188      | 9,000-06  | 35.9  |
|                                                                                                                                 |                                                                                                            |                                                                                                                |                                                                          | LOC_0a08g31910.1.instron.6 | LOC_0a08g31910.1.exon.1 | 70    | 251      | 262  | 31   | 2        | 7,000-04  | 35.9  |
|                                                                                                                                 |                                                                                                            |                                                                                                                |                                                                          | LOC_0a08g31910.1.exon.1    | LOC_0a08g31910.1.exon.1 | 86.85 | 234      | 320  | 147  | 233      | 2,000-42  | 77.1  |
| LOC_0a08g2500.1(1109+292+982*(132*(4)))                                                                                         | E_GMI_7_400.1(1109+292+982)                                                                                | AT1012420.1(63+109+224+292+977+982)                                                                            | 132(new)                                                                 | LOC_0a08g2500.1.exon.3     | LOC_0a08g2500.1.exon.4  | 36    | 463      | 612  | 28   | 177      | 2,000-07  | 40    |
| LOC_0a08g1480.1(124*(1+187*(2)+65*(3)+1751*(4)+986+1036+1137+1263+1266+1294+1381+1468+1534+1627+1684+1816+1907+1996+2190+2302)) | ESTTEXT_PGENRESL_PG_C_CHR_2881(1038+1177+1263+1266+1294+1381+1468+1534+1627+1684+1816+1907+1996+2190+2302) | AT4010800.1(986+1036+1137+1263+1266+1294+1381+1468+1534+1627+1684+1816+1907+1996+2190+2302)                    | 1294(new new 2101(new) 25(new 986 167(new new 693(new new 1751(new new)) | LOC_0a08g1480.1.exon.3     | LOC_0a08g1480.1.exon.3  | 50    | 219      | 160  | 325  | 265      | 8,000-14  | 27.2  |
| LOC_0a10g40934.5(1268+516+691*(5)+847)                                                                                          | E_GMI_1_1355.1(1268+516+847)                                                                               | AT1017020.1(1268+516+847)                                                                                      | 691(new new)                                                             | LOC_0a10g40934.5.exon.1    | LOC_0a10g40934.5.exon.3 | 74.29 | 210      | 1    | 1545 | 1358     | 6,000-48  | 124   |
|                                                                                                                                 |                                                                                                            |                                                                                                                |                                                                          | LOC_0a10g40934.5.exon.2    | LOC_0a10g40934.5.exon.4 | 91.12 | 1        | 246  | 1    | 246      | 8,000-44  | 193.4 |
|                                                                                                                                 |                                                                                                            |                                                                                                                |                                                                          | LOC_0a10g40934.5.exon.2    | LOC_0a10g40934.5.exon.5 | 85.71 | 329      | 496  | 2    | 169      | 2,000-11  | 120   |
|                                                                                                                                 |                                                                                                            |                                                                                                                |                                                                          | LOC_0a10g40934.5.exon.2    | LOC_0a10g40934.5.exon.6 | 86.42 | 305      | 852  | 1    | 78       | 1,000-12  | 58.8  |
|                                                                                                                                 |                                                                                                            |                                                                                                                |                                                                          | LOC_0a10g40934.5.exon.3    | LOC_0a10g40934.5.exon.7 | 79.35 | 278      | 3    | 278  | 3        | 4,000-52  | 169   |
|                                                                                                                                 |                                                                                                            |                                                                                                                |                                                                          | LOC_0a10g40934.5.instron.2 | LOC_0a10g40934.5.exon.2 | 84    | 2        | 76   | 499  | 972      | 8,000-13  | 55.1  |
|                                                                                                                                 |                                                                                                            |                                                                                                                |                                                                          | LOC_0a10g40934.5.instron.3 | LOC_0a10g40934.5.exon.2 | 95.24 | 22       | 85   | 264  | 326      | 6,000-11  | 55.8  |
| LOC_0a01g71860.1(8*(1)+85*(2))                                                                                                  | ESTTEXT_PGENRESL_PG_C_CHR_30415(971+230)                                                                   | AT507260.1(974)                                                                                                | 8(new 955(new new))                                                      | LOC_0a01g71860.1.exon.2    | LOC_0a01g71860.1.exon.3 | 66.88 | 462      | 932  | 471  | 941      | 4,000-123 | 262   |
|                                                                                                                                 |                                                                                                            |                                                                                                                |                                                                          | LOC_0a01g71860.1.exon.2    | LOC_0a01g71860.1.exon.3 | 56.3  | 9        | 365  | 30   | 386      | 4,000-123 | 158   |
| LOC_0a07g39250.1(2308*(1))                                                                                                      | ESTTEXT_PGENRESL_PG_C_CHR_30432(1185+969)                                                                  | AT1082780.1(1)                                                                                                 | 3308(new)                                                                | LOC_0a07g39250.1.exon.1    | LOC_0a07g39250.1.exon.1 | 50    | 1393     | 1494 | 1293 | 1364     | 3,000-139 | 139   |
| LOC_0a09g39090.1(530+922+1119*(3)+1126*(4))                                                                                     | ESTTEXT_PGENRESL_PG_C_CHR_71989(530+781)                                                                   | AT506260.1(530+922)                                                                                            | 1119(new 1126(new))                                                      | LOC_0a09g39090.1.exon.3    | LOC_0a09g39090.1.exon.5 | 62.5  | 78       | 195  | 67   | 186      | 1,000-17  | 72.5  |
| LOC_0a06g10730.1(29*(1+12050+2371+2458+3070+3219+3530+3745+4051+4135+4385))                                                     | SB02004080(2060+2371+2458+3070+3219+3530+3745+4051+4135+4385)                                              | AT3021250.1(2060+2371+2458+3070+3219+3530+3745+4051+4135+4385)                                                 | 29(new new)                                                              | LOC_0a06g10730.1.exon.2    | LOC_0a06g10730.1.exon.2 | 82.94 | 626      | 976  | 920  | 870      | 2,000-71  | 178   |
| LOC_0a01g1160.1(11353*(1))                                                                                                      | E_GMI_3_262(1)                                                                                             | AT2034960.1(1)                                                                                                 | 1353(new new)                                                            | LOC_0a01g1160.1.exon.1     | LOC_0a01g1160.1.exon.1  | 39.13 | 613      | 545  | 523  | 455      | 7,000-48  | 39.6  |
|                                                                                                                                 |                                                                                                            |                                                                                                                |                                                                          | LOC_0a01g1160.1.exon.2     | LOC_0a01g1160.1.exon.2  | 37.5  | 241      | 146  | 455  | 360      | 5,000-44  | 26.3  |
| LOC_0a01g15910.1(178*(1)+522+573+665+766+817+894+6100+1091+1131+1226+1331+1486+1513+1597+1696+1801+1873+2063)                   | AT5017310.2(522+573+665+766+817+894+6100+1091+1131+1226+1331+1486+1513+1597+1696+1801+1873+2063)           | ESTTEXT_PGENRESL_PG_C_CHR_2072(522+573+665+766+817+894+6100+1091+1131+1226+1331+1486+1513+1597+1696+1801+1873) | 78(new)                                                                  | LOC_0a01g15910.1.exon.2    | LOC_0a01g15910.1.exon.2 | 77.78 | 65       | 91   | 34   | 60       | 5,000-42  | 121   |
| LOC_0a06g51130.1(1078*(1))                                                                                                      | ESTTEXT_PGENRESL_PG_C_CHR_102758(1229+547+684+1029)                                                        | AT5042340.1(547+684+1029)                                                                                      | 1078(new)                                                                | LOC_0a06g51130.1.exon.2    | LOC_0a06g51130.1.exon.2 | 81.71 | 324      | 202  | 450  | 328      | 1,000-118 | 131   |
| LOC_0a02g29450.1(1251+421+532+1037+1085*(6)+1373+1513+2003)                                                                     | ESTTEXT_PGENRESL_PG_C_CHR_41283(1251+422+533+211037+1373+1513+2003)                                        | AT508870.1(1158+422+532+1037+1373+1513+2003)                                                                   | 1085(new new)                                                            | LOC_0a02g29450.1.exon.3    | LOC_0a02g29450.1.exon.3 | 46.15 | 6        | 83   | 9    | 86       | 1,000-10  | 83.6  |
| LOC_0a02g56760.1(298+417+1030*(3)+1248*(4))                                                                                     | ESTTEXT_PGENRESL_PG_C_CHR_41265(298+417)                                                                   | AT502160.1(298+417)                                                                                            | 1030(dup 1248(new))                                                      | LOC_0a02g56760.1.exon.2    | LOC_0a02g56760.1.exon.4 | 77.27 | 1        | 66   | 1    | 66       | 2,000-09  | 44.1  |
|                                                                                                                                 |                                                                                                            |                                                                                                                |                                                                          | LOC_0a02g56760.1.exon.3    | LOC_0a02g56760.1.exon.5 | 43.08 | 6        | 200  | 9    | 200      | 4,000-12  | 56.1  |
| LOC_0a01g61820.1(167162*(2)+289*(3)+423*(4)+61673+799)                                                                          | ESTTEXT_PGENRESL_PG_C_CHR_36573(61676+672+799)                                                             | AT5002960.1(61676+672+799)                                                                                     | 1671(dup new 289(dup new 423(new))                                       | LOC_0a01g61820.1.exon.2    | LOC_0a01g61820.1.exon.6 | 100   | 1        | 156  | 1    | 156      | 2,000-36  | 138   |
|                                                                                                                                 |                                                                                                            |                                                                                                                |                                                                          | LOC_0a01g61820.1.exon.3    | LOC_0a01g61820.1.exon.7 | 100   | 126      | 6    | 126  | 1        | 6,000-27  | 103   |
|                                                                                                                                 |                                                                                                            |                                                                                                                |                                                                          | LOC_0a01g61820.1.instron.4 | LOC_0a01g61820.1.exon.8 | 88.82 | 6        | 134  | 6    | 134      | 9,000-13  | 118   |
|                                                                                                                                 |                                                                                                            |                                                                                                                |                                                                          | LOC_0a01g61820.1.instron.4 | LOC_0a01g61820.1.exon.8 | 78    | 204      | 46   | 195  | 204      | 5,000-36  | 90.4  |
|                                                                                                                                 |                                                                                                            |                                                                                                                |                                                                          | LOC_0a01g61820.1.instron.4 | LOC_0a01g61820.1.exon.8 | 100   | 1        | 54   | 135  | 188      | 5,000-30  | 87.2  |



|                                                                                                     |                                                                                  |                                                                                            |                                                                                                          |                           |                         |       |      |      |     |     |          |      |
|-----------------------------------------------------------------------------------------------------|----------------------------------------------------------------------------------|--------------------------------------------------------------------------------------------|----------------------------------------------------------------------------------------------------------|---------------------------|-------------------------|-------|------|------|-----|-----|----------|------|
| L0C_0a02g56200.1(410*(11:650:826;1007:1060;1204:1309:1462:1642:1767:1930:1996:2090:2203:2274:2482)) | SBO0036510(826:1007:1060:1204:1309:1462:1642:1767:1930:1996:2090:2203:2274:2482) | AV2039190.2(1650:847;826:1007:1060:1204:1309:1462:1660:1767:1930:1996:2090:2203:2274:2482) | 410(new)                                                                                                 | L0C_0a02g56200.1.exon.2   | L0C_0a02g56200.1.exon.3 | 75    | 3    | 62   | 3   | 62  | 3,000-07 | 39.1 |
| L0C_0a03g27580.1(313*(11))                                                                          | BTXYT_PGNSB1_XG-C_CHR_6006(1)                                                    | AV4002360.1(1)                                                                             | 313(new)                                                                                                 | L0C_0a03g27580.1.intron.1 | L0C_0a03g27580.1.exon.2 | 88.89 | 89   | 36   | 94  | 41  | 1,000-09 | 46   |
|                                                                                                     |                                                                                  |                                                                                            |                                                                                                          | L0C_0a03g27580.1.intron.1 | L0C_0a03g27580.1.exon.1 | 93.75 | 393  | 440  | 243 | 290 | 9,000-09 | 42.8 |
| L0C_0a02g20720.1(163*(11:198*(2):241*(3):377(354*(4):378*(5):421*(6):482*(7):499*(8):624*(9)))      | R_GM1.5.16579.1(13387)                                                           | AV5019000.1(1086:1450:1336)                                                                | 163(new)<br>198(new)<br>241(new)<br>374(new)<br>378(new)<br>421(new)<br>482(new)<br>499(new)<br>624(new) | L0C_0a02g20720.1.exon.1   | L0C_0a02g20720.1.exon.4 | 97.06 | 60   | 161  | 3   | 104 | 8,000-21 | 83.5 |
|                                                                                                     |                                                                                  |                                                                                            |                                                                                                          | L0C_0a02g20720.1.exon.1   | L0C_0a02g20720.1.exon.4 | 87.5  | 3    | 50   | 36  | 83  | 5,000-07 | 37.7 |
|                                                                                                     |                                                                                  |                                                                                            |                                                                                                          | L0C_0a02g20720.1.intron.3 | L0C_0a02g20720.1.exon.1 | 79.31 | 247  | 191  | 139 | 92  | 3,000-12 | 57.4 |
|                                                                                                     |                                                                                  |                                                                                            |                                                                                                          | L0C_0a02g20720.1.intron.3 | L0C_0a02g20720.1.exon.1 | 100   | 202  | 255  | 3   | 56  | 3,000-10 | 49.2 |
|                                                                                                     |                                                                                  |                                                                                            |                                                                                                          | L0C_0a02g20720.1.intron.3 | L0C_0a02g20720.1.exon.4 | 77.78 | 247  | 167  | 81  | 1   | 1,000-21 | 34.2 |
|                                                                                                     |                                                                                  |                                                                                            |                                                                                                          | L0C_0a02g20720.1.intron.9 | L0C_0a02g20720.1.exon.9 | 100   | 32   | 71   | 54  | 113 | 3,000-09 | 46.9 |
|                                                                                                     |                                                                                  |                                                                                            |                                                                                                          | L0C_0a02g20720.1.exon.1   | L0C_0a02g20720.1.exon.1 | 87.5  | 93   | 140  | 3   | 50  | 5,000-07 | 37.7 |
| L0C_0a05g43910.1(967(1624:1621*(21)))                                                               | BTXYT_PGNSB1GB10JUB-C_CHR_91120(967)                                             | AV3048280.1(967)                                                                           | 1624(new)                                                                                                | L0C_0a05g43910.1.exon.1   | L0C_0a05g43910.1.exon.1 | 35.48 | 322  | 230  | 854 | 762 | 3,000-09 | 22.5 |
|                                                                                                     |                                                                                  |                                                                                            |                                                                                                          | L0C_0a05g43910.1.exon.3   | L0C_0a05g43910.1.exon.3 | 88.89 | 52   | 1    | 152 | 100 | 3,000-10 | 66.4 |
| L0C_0a06g41880.1(32*(11:404*(12):435(449:733(843:971(1130:1248:1792:1887:2175:2290:2504)))          | BTXYT_PGNSB1S81-C_CHR_106910(733:843:971:1130:1248:1792:1887:2142:2290:2504)     | AV4034960.1(1)                                                                             | 382(new)<br>404(new)                                                                                     | L0C_0a06g41880.1.intron.1 | L0C_0a06g41880.1.exon.1 | 65    | 4    | 123  | 228 | 347 | 5,000-13 | 61.6 |
|                                                                                                     |                                                                                  |                                                                                            |                                                                                                          | L0C_0a06g41880.1.intron.1 | L0C_0a06g41880.1.exon.1 | 88.46 | 3    | 80   | 140 | 226 | 3,000-12 | 59.3 |
|                                                                                                     |                                                                                  |                                                                                            |                                                                                                          | L0C_0a06g41880.1.intron.1 | L0C_0a06g41880.1.exon.1 | 84.62 | 3    | 80   | 71  | 168 | 2,000-13 | 56.5 |
|                                                                                                     |                                                                                  |                                                                                            |                                                                                                          | L0C_0a06g41880.1.intron.1 | L0C_0a06g41880.1.exon.1 | 85.21 | 76   | 14   | 66  | 4   | 1,000-08 | 46.9 |
|                                                                                                     |                                                                                  |                                                                                            |                                                                                                          | L0C_0a06g41880.1.exon.1   | L0C_0a06g41880.1.exon.1 | 93.75 | 147  | 4    | 381 | 238 | 9,000-10 | 118  |
| L0C_0a07g35520.1(74(1448(21:1708)))                                                                 | PGNSB1_PG-C_CHR_200302(74:1708)                                                  | AV505180.1(74:1708)                                                                        | 1448(new)<br>1404(new)                                                                                   | L0C_0a07g35520.1.exon.2   | L0C_0a07g35520.1.exon.3 | 87.07 | 1050 | 1295 | 3   | 248 | 3,000-38 | 144  |

**C. elegans**

| GeneID (CDS intron positions; * indicates new intron position)                                             | Ortholog1 (CDS intron positions)                                                                    | Ortholog2 (CDS intron positions)                                                              | New Intron Position (Type) EST evidence                                 | Internal duplicated Region |                   |            |          |        |          |        |          |           |
|------------------------------------------------------------------------------------------------------------|-----------------------------------------------------------------------------------------------------|-----------------------------------------------------------------------------------------------|-------------------------------------------------------------------------|----------------------------|-------------------|------------|----------|--------|----------|--------|----------|-----------|
|                                                                                                            |                                                                                                     |                                                                                               |                                                                         | Query id                   | Subject id        | % identity | q. start | q. end | s. start | s. end | e-value  | bit score |
| C4107.21(8:212;440;749;777;922;1161*(7);1351;1472;2044;2623;)                                              | CM005961(96:232;740;649;777;961;1161;1072;2044;1472;2044;2623;)                                     | NM_061117(481;458;652;784;778;970;926;1363;1364;1501;1395;1676;1062;2053;)                    | 1161(new);                                                              | C4107.2.intron.6           | C4107.2.exon.8    | 100        | 258      | 299    | 136      | 177    | 3.00E-07 | 39.6      |
| Y618A.1(1362;1004;995*(2);)                                                                                | CM016980(216;362;738;)                                                                              | NM_064059(216;364;556;702;883;)                                                               | 1004(new);                                                              | Y618A.1.intron.1           | Y618A.1.exon.1    | 100        | 871      | 1027   | 3        | 359    | 2.00E-81 | 286       |
|                                                                                                            |                                                                                                     |                                                                                               |                                                                         | Y618A.1.intron.1           | Y618A.1.exon.2    | 100        | 81       | 131    | 3        | 83     | 4.00E-15 | 66.6      |
| Z8184.1(826;1190*(2);)                                                                                     | CM020329(826;)                                                                                      | NM_371584(784;)                                                                               | 1190(new);                                                              | Z8184.3.exon.1             | Z8184.3.exon.3    | 46.95      | 394      | 747    | 393      | 746    | 1.00E-90 | 200       |
|                                                                                                            |                                                                                                     |                                                                                               |                                                                         | Z8184.3.exon.1             | Z8184.3.exon.3    | 82.35      | 81       | 98     | 128      | 128    | 1.00E-90 | 135       |
|                                                                                                            |                                                                                                     |                                                                                               |                                                                         |                            |                   |            |          |        |          |        |          |           |
| Y0584.8(159*(1);289;548;)                                                                                  | NM_071747(286;388;506;811;)                                                                         | CM010420(289;548;)                                                                            | 159(new);                                                               | Y0584.8.exon.1             | Y0584.8.exon.1    | 92.03      | 1        | 138    | 171      | 308    | 1.00E-51 | 186       |
|                                                                                                            |                                                                                                     |                                                                                               |                                                                         |                            |                   |            |          |        |          |        |          |           |
| E02C12.1(101;42;229;409;1054;1260*(5);1402*(6);1466*(7);1823*(8);)                                         | CM019264(142;229;409;958;1054;)                                                                     | NM_073870(112;136;217;)                                                                       | 1402(dup);1659(dup);1260(new);1823(new);                                | E02C12.10.exon.1           | E02C12.10.exon.6  | 55.32      | 1        | 141    | 2        | 142    | 1.00E-16 | 65.1      |
|                                                                                                            |                                                                                                     |                                                                                               |                                                                         | E02C12.10.exon.2           | E02C12.10.exon.9  | 55.17      | 1        | 87     | 1        | 87     | 3.00E-08 | 39.6      |
|                                                                                                            |                                                                                                     |                                                                                               |                                                                         | E02C12.10.exon.9           | E02C12.10.exon.9  | 48.28      | 1        | 87     | 1        | 87     | 4.00E-07 | 35.9      |
|                                                                                                            |                                                                                                     |                                                                                               |                                                                         | E02C12.10.exon.9           | E02C12.10.exon.9  | 53.81      | 1        | 160    | 68       | 261    | 2.00E-26 | 81.2      |
|                                                                                                            |                                                                                                     |                                                                                               |                                                                         | E02C12.10.exon.3           | E02C12.10.exon.9  | 48.57      | 1        | 105    | 88       | 192    | 3.00E-07 | 37.7      |
|                                                                                                            |                                                                                                     |                                                                                               |                                                                         | E02C12.10.exon.4           | E02C12.10.exon.9  | 57.14      | 1        | 84     | 1        | 84     | 2.00E-08 | 43.7      |
|                                                                                                            |                                                                                                     |                                                                                               |                                                                         | E02C12.10.exon.7           | E02C12.10.exon.9  | 60.94      | 1        | 132    | 1        | 132    | 2.00E-23 | 62.1      |
|                                                                                                            |                                                                                                     |                                                                                               |                                                                         | E02C12.10.intron.8         | E02C12.10.exon.1  | 63.81      | 15       | 195    | 1        | 141    | 4.00E-19 | 74.4      |
|                                                                                                            |                                                                                                     |                                                                                               |                                                                         | E02C12.10.intron.8         | E02C12.10.exon.6  | 61.7       | 55       | 195    | 2        | 142    | 5.00E-18 | 67.5      |
| Y5402A.38(151;1388*(2);526*(3);715;835;1072;1210;2139);)                                                   | CM013903(1072;1210;1399;1525;1604;)                                                                 | NM_00102833(151;217;712;835;895;1069;1399;)                                                   | 388(dup);526(dup);                                                      | Y5402A.38.exon.2           | Y5402A.38.exon.6  | 96.2       | 1        | 237    | 1        | 237    | 5.00E-54 | 194       |
|                                                                                                            |                                                                                                     |                                                                                               |                                                                         | Y5402A.38.exon.9           | Y5402A.38.exon.9  | 56.52      | 1        | 138    | 1        | 138    | 3.00E-16 | 68        |
|                                                                                                            |                                                                                                     |                                                                                               |                                                                         | Y5402A.38.exon.4           | Y5402A.38.exon.9  | 49.52      | 1        | 109    | 1        | 109    | 2.00E-06 | 62        |
|                                                                                                            |                                                                                                     |                                                                                               |                                                                         | Y5402A.38.exon.7           | Y5402A.38.exon.9  | 80.53      | 13       | 202    | 13       | 202    | 1.00E-13 | 105.5     |
|                                                                                                            |                                                                                                     |                                                                                               |                                                                         | Y5402A.38.intron.5         | Y5402A.38.exon.1  | 98         | 728      | 878    | 1        | 150    | 2.00E-36 | 119       |
| R07C3.1(151;241;1386;509*(4);616*(5);709*(6);895*(7);)                                                     | CM009432(386;1456;)                                                                                 | NM_073870(247;386;1456;1390;1783;1732;)                                                       | 616(dup);709(dup);509(new);616(new);                                    | R07C3.1.exon.4             | R07C3.1.exon.7    | 65.38      | 3        | 80     | 151      | 228    | 5.00E-11 | 48.7      |
| F35R12.1(1308(1);1421;559;777;)                                                                            | CM01148(421;559;777;)                                                                               | NM_070103(1;)                                                                                 | 308(new);                                                               | F35R12.1.intron.1          | F35R12.1.exon.1   | 90.91      | 69       | 37     | 226      | 258    | 2.00E-21 | 71.6      |
| M153.3(135*(1);244;456;563;741;7870;1100;)                                                                 | CM016222(563;134741;870;1100;)                                                                      | NM_072631(244;456;)                                                                           | 35(new);                                                                | M153.3.exon.2              | M153.3.exon.5     | 44.19      | 51       | 179    | 48       | 176    | 4.00E-12 | 54.2      |
| F56A4.11(102*(1);1338*(2);816*(3);858*(4);7197(1);085;1553;1864;2026;2143;)                                | CM01115(978;1085;1307;1563;1864;2026;2143;)                                                         | NM_071251(980;1057;1303;1560;1840;2026;)                                                      | 102(dup);1338(new);816(new);78(new);                                    | F56A4.11.exon.1            | F56A4.11.exon.5   | 65.22      | 31       | 99     | 50       | 118    | 9.00E-09 | 42.3      |
|                                                                                                            |                                                                                                     |                                                                                               |                                                                         | F56A4.11.exon.2            | F56A4.11.exon.6   | 88.57      | 2        | 106    | 2        | 106    | 5.00E-20 | 61.2      |
|                                                                                                            |                                                                                                     |                                                                                               |                                                                         | F56A4.11.exon.3            | F56A4.11.exon.7   | 80.62      | 81       | 467    | 81       | 467    | 1.00E-75 | 260       |
|                                                                                                            |                                                                                                     |                                                                                               |                                                                         | F56A4.11.exon.7            | F56A4.11.exon.7   | 90         | 3        | 32     | 3        | 32     | 1.00E-75 | 236       |
| T19A5.5(954*(1);593;754;976;1072;1438;)                                                                    | CM019142(534;593;754;976;1072;1438;)                                                                | NM_072912(456;535;876;1141;1435;)                                                             | 354(new);                                                               | T19A5.5.exon.1             | T19A5.5.exon.2    | 77.03      | 52       | 273    | 17       | 218    | 2.00E-42 | 156       |
| K1102.40(314;484;680;693*(4);)                                                                             | CM008722(179;314;484;680;)                                                                          | NM_00104722(226;283;343;484;682;685;781;)                                                     | 693(new);                                                               | K1102.40.exon.2            | K1102.40.exon.4   | 44         | 118      | 192    | 6        | 80     | 5.00E-06 | 31.1      |
| C0205.3a(44*(1);485*(2);738*(3);893;1358;)                                                                 | CM018105(893;1358;)                                                                                 | NM_00104377(1219;1339;1498;)                                                                  | 44(dup);485(dup);738(new);                                              | C0205.3a.exon.2            | C0205.3a.exon.5   | 77.61      | 39       | 440    | 63       | 464    | 3.00E-78 | 205       |
|                                                                                                            |                                                                                                     |                                                                                               |                                                                         | C0205.3a.exon.2            | C0205.3a.exon.5   | 86.67      | 1        | 45     | 24       | 68     | 3.00E-78 | 203       |
|                                                                                                            |                                                                                                     |                                                                                               |                                                                         | C0205.3a.exon.3            | C0205.3a.exon.6   | 73.49      | 3        | 251    | 3        | 251    | 8.00E-44 | 146       |
| T04C12.1(194;109*(2);350*(3);527*(4);)                                                                     | CM023095(194;)                                                                                      | NM_071341(97;)                                                                                | 527(dup);527(new);350(new);                                             | T04C12.1.exon.2            | T04C12.1.exon.5   | 89.36      | 36       | 82     | 36       | 82     | 9.00E-12 | 54        |
|                                                                                                            |                                                                                                     |                                                                                               |                                                                         | T04C12.1.exon.1            | T04C12.1.exon.4   | 62.75      | 40       | 192    | 24       | 176    | 2.00E-21 | 84.3      |
| H25R10.1(1334;258;571;1076;1211*(5);1370*(6);)                                                             | CM00344(134;286;571;1076;)                                                                          | NM_070491(133;284;288;766;889;1076;)                                                          | 1370(dup);1211(new);                                                    | H25R10.1.exon.2            | H25R10.1.exon.6   | 96.23      | 1        | 159    | 1        | 159    | 1.00E-75 | 268       |
|                                                                                                            |                                                                                                     |                                                                                               |                                                                         | H25R10.1.exon.3            | H25R10.1.exon.7   | 92.18      | 2        | 179    | 2        | 179    | 3.00E-68 | 244       |
| C33C12.8(41*(1);380;533;667;740;1078;1210;1297;1461;1483;)                                                 | CM01050(380;533;667;740;1078;1210;1297;1461;1483;)                                                  | NM_00104285(274;380;667;1078;1210;1459;1483;)                                                 | 41(new);                                                                | C33C12.8.intron.1          | C33C12.8.exon.2   | 67.5       | 293      | 174    | 121      | 2      | 6.00E-15 | 65.2      |
| F12R12.1(1163*(1);1363*(2);404;1003;)                                                                      | CM012129(404;832;1003;)                                                                             | NM_071350(640;832;)                                                                           | 163(dup);1363(new);                                                     | F12R12.11.exon.1           | F12R12.11.exon.4  | 94.44      | 1        | 162    | 438      | 599    | 8.00E-33 | 122       |
|                                                                                                            |                                                                                                     |                                                                                               |                                                                         | F12R12.11.exon.9           | F12R12.11.exon.9  | 90.97      | 3        | 198    | 3        | 198    | 4.00E-40 | 147       |
| Y104H12D.1(197;310*(2);1484;)                                                                              | NM_067649(197;403;)                                                                                 | CM011937(197;403;484;)                                                                        | 310(new);est;                                                           | Y104H12D.1.intron.2        | Y104H12D.1.exon.4 | 100        | 730      | 880    | 3        | 51     | 8.00E-08 | 44.6      |
| M03A1.3(205;313;556;744;985;1144*(6);1285*(7);1713*(8);1793*(9);1957*(10);)                                | NM_062404(739;985;)                                                                                 | CM013459(205;313;556;744;985;1144;1045;)                                                      | 1285(dup);744(dup);1713(dup);est;1144(new);1793(new);est;1957(new);est; | M03A1.3.exon.3             | M03A1.3.exon.8    | 49.3       | 31       | 243    | 28       | 240    | 1.00E-22 | 90        |
|                                                                                                            |                                                                                                     |                                                                                               |                                                                         | M03A1.3.exon.4             | M03A1.3.exon.6    | 67.21      | 1        | 242    | 242      | 242    | 8.00E-20 | 110       |
|                                                                                                            |                                                                                                     |                                                                                               |                                                                         | M03A1.3.exon.5             | M03A1.3.exon.10   | 36.11      | 110      | 317    | 110      | 317    | 4.00E-08 | 111.5     |
|                                                                                                            |                                                                                                     |                                                                                               |                                                                         | M03A1.3.exon.5             | M03A1.3.exon.9    | 73.68      | 2        | 58     | 2        | 58     | 1.00E-07 | 40        |
|                                                                                                            |                                                                                                     |                                                                                               |                                                                         | M03A1.3.exon.6             | M03A1.3.exon.11   | 48         | 25       | 24     | 135      | 135    | 2.00E-07 | 36.2      |
| M01R10.2(970;126;385;673*(4);1111;1404*(6);13580;12065;2056;2362;2425;2926;3334;3487;3562;3641;3785;3855;) | NM_065501(979;709;1311;1378;1538;1618;1851;1995;2359;2425;2560;2659;2923;3334;3487;3641;3784;3844;) | CM015118(970;126;1111;1350;1786;2050;2057;2362;2425;2684;2926;3334;3481;3562;3641;3785;3855;) | 1404(new);673(new);                                                     | M01R10.2.exon.5            | M01R10.2.exon.5   | 61.64      | 282      | 244    | 321      | 283    | 4.00E-34 | 46        |
| Y19D10A.10(102*(1);209*(2);1687*(3);1729*(4);449;1958;1434;1735;1897;2011;)                                | CM01116(649;956;1278;1434;1735;1897;2011;)                                                          | NM_071251(851;928;1174;1431;1711;1897;)                                                       | 102(dup);209(dup);1687(new);77(2)(new);                                 | Y19D10A.10.exon.1          | Y19D10A.10.exon.5 | 65.22      | 31       | 99     | 60       | 118    | 9.00E-09 | 42.3      |
|                                                                                                            |                                                                                                     |                                                                                               |                                                                         | Y19D10A.10.exon.2          | Y19D10A.10.exon.6 | 88.57      | 2        | 106    | 2        | 106    | 1.00E-20 | 61.2      |
|                                                                                                            |                                                                                                     |                                                                                               |                                                                         | Y19D10A.10.exon.3          | Y19D10A.10.exon.7 | 80.42      | 81       | 467    | 81       | 467    | 1.00E-75 | 260       |
|                                                                                                            |                                                                                                     |                                                                                               |                                                                         | Y19D10A.10.exon.7          | Y19D10A.10.exon.7 | 90         | 3        | 32     | 3        | 32     | 1.00E-75 | 236       |
| T22P7.5(311*(1);1751;890;1267;1376;)                                                                       | NM_071066(334;697;889;1036;1267;)                                                                   | CM015281(751;890;1267;)                                                                       | 311(new);                                                               | T22P7.5.exon.2             | T22P7.5.exon.3    | 31.11      | 481      | 615    | 4        | 138    | 1.00E-07 | 40.6      |
| C37E2.3(127*(1);235*(2);379;487;639;705;854;)                                                              | CM016110(379;487;639;705;854;)                                                                      | NM_00102977(364;640;)                                                                         | 127(dup);235(dup);                                                      | C37E2.3.exon.2             | C37E2.3.exon.4    | 48.57      | 1        | 105    | 1        | 105    | 8.00E-10 | 45.1      |
|                                                                                                            |                                                                                                     |                                                                                               |                                                                         | C37E2.3.intron.2           | C37E2.3.exon.5    | 59.13      | 227      | 274    | 22       | 150    | 7.00E-10 | 49.2      |
| AKC.1(64;165;262;773;1002*(5);)                                                                            | CM010231(64;161;773;)                                                                               | NM_071665(67;421;534;640;643;772;)                                                            | 1002(new);                                                              | AKC.1.exon.5               | AKC.1.exon.6      | 81.25      | 100      | 215    | 71       | 166    | 6.00E-14 | 59.8      |

|                                                                                                      |                                           |                                                    |                                                            |                 |                  |       |     |     |     |     |          |      |
|------------------------------------------------------------------------------------------------------|-------------------------------------------|----------------------------------------------------|------------------------------------------------------------|-----------------|------------------|-------|-----|-----|-----|-----|----------|------|
| C4507.1(1413511258:325141394)                                                                        | CB010836(351351:2681394)                  | NM_067806(1511258)                                 | 325(new)                                                   | C4507.1.exon.4  | C4507.1.exon.5   | 94.74 | 1   | 57  | 13  | 69  | 5.05E-23 | 89.7 |
| W04C9.6(134143:338727:9661090:11861257:1437<br>*)                                                    | CB022670(143:291332:727:9661090:11861257) | NM_058336(133:346:316:703:964:1186:125<br>8(1249)) | 1437(new)                                                  | W04C9.6.exon.10 | W04C9.6.exon.10  | 66.67 | 88  | 62  | 31  | 5   | 7.05E-55 | 24.9 |
| ZK792.1a(131521110:238468:63073771297:148071<br>623*(10113711111113769*(1212392*(13112611*(1<br>4))) | CB006999(52110:323:468:63073771297:14807) | NM_069806(238:469:628:1297:1300:14807)             | 2192(dup);1623(new);1711(new<br>);11789(new);2811(new)alt; | ZK792.1a.exon.8 | ZK792.1a.exon.14 | 29.79 | 258 | 398 | 273 | 413 | 3.05E-09 | 35.4 |
|                                                                                                      |                                           |                                                    |                                                            | ZK792.1a.exon.8 | ZK792.1a.exon.14 | 42.31 | 93  | 170 | 102 | 179 | 1.05E-09 | 30.4 |
|                                                                                                      |                                           |                                                    |                                                            | ZK792.1a.exon.9 | ZK792.1a.exon.15 | 38.24 | 82  | 183 | 229 | 330 | 1.05E-09 | 37.3 |
|                                                                                                      |                                           |                                                    |                                                            | ZK792.1a.exon.9 | ZK792.1a.exon.15 | 50    | 5   | 48  | 142 | 189 | 1.05E-09 | 26.3 |

| D. melanogaster                                                              |                                                                     |                                                                |                                                                                         |                                     |                       |            |          |        |          |        |           |           |
|------------------------------------------------------------------------------|---------------------------------------------------------------------|----------------------------------------------------------------|-----------------------------------------------------------------------------------------|-------------------------------------|-----------------------|------------|----------|--------|----------|--------|-----------|-----------|
| GeneID(CDS intron positions)                                                 | Ortholog1(CDS intron positions)                                     | Ortholog2(CDS intron positions)                                | New Intron Type(position type) EST evidence                                             | Internal duplicated Region Query id | Subject id            | % identity | q. start | q. end | s. start | s. end | e-value   | bit score |
| gdp-PA(90*(1125*(211316*(3318761031))                                        | FB000199155(8761031)                                                | FB00021628(8761031)                                            | 257(new eat:1316 new eat:90 new eat:                                                    | gdp-PA.intron.3                     | gdp-PA.exon.4         | 44.36      | 2460     | 3038   | 25       | 423    | 9.00E-57  | 139       |
|                                                                              |                                                                     |                                                                |                                                                                         | gdp-PA.intron.3                     | gdp-PA.exon.4         | 47.08      | 972      | 1124   | 1        | 151    | 3.00E-46  | 138       |
|                                                                              |                                                                     |                                                                |                                                                                         | gdp-PA.intron.3                     | gdp-PA.exon.6         | 69.87      | 7619     | 7756   | 21       | 159    | 1.00E-16  | 75.9      |
|                                                                              |                                                                     |                                                                |                                                                                         | gdp-PA.intron.3                     | gdp-PA.exon.6         | 58.14      | 5004     | 5312   | 21       | 159    | 5.00E-13  | 67.5      |
|                                                                              |                                                                     |                                                                |                                                                                         | gdp-PA.intron.3                     | gdp-PA.exon.6         | 53.03      | 3600     | 3600   | 15       | 144    | 3.00E-12  | 64.8      |
|                                                                              |                                                                     |                                                                |                                                                                         | gdp-PA.intron.3                     | gdp-PA.exon.5         | 42         | 2011     | 2163   | 15       | 144    | 4.00E-10  | 57.6      |
|                                                                              |                                                                     |                                                                |                                                                                         | gdp-PA.intron.3                     | gdp-PA.exon.5         | 64         | 1846     | 1935   | 2        | 151    | 5.00E-16  | 73.6      |
|                                                                              |                                                                     |                                                                |                                                                                         |                                     |                       |            |          |        |          |        |           |           |
| OC935-DB(89:254:494:661:898:1051:1255:1459:1564:200:2252:2617:1251)          | FB000214308(254:494:661:898:1051:1255:1459:1564:200:2252:2617:1251) | FB000204700(254:494:661:898:1051:1255:1459:1564:200:2152:2899) | 2411(new eat:                                                                           | OC935-DB.intron.12                  | OC935-DB.exon.5       |            |          |        |          |        |           |           |
|                                                                              |                                                                     |                                                                |                                                                                         | OC935-DB.intron.12                  | OC935-DB.exon.6       | 88.73      | 1682     | 1446   | 1        | 237    | 3.00E-51  | 189       |
|                                                                              |                                                                     |                                                                |                                                                                         |                                     |                       | 100        | 1281     | 1281   | 3        | 152    | 4.00E-31  | 122       |
| OD34402-PC(149:318:545:1127*(412547*(51749*(61))                             | FB000209964(545)                                                    | FB000213893(545)                                               | 1547(dup eat:1127 new eat:1749 new eat:                                                 | OD34402-PC.exon.4                   | OD34402-PC.exon.6     |            |          |        |          |        |           |           |
|                                                                              |                                                                     |                                                                |                                                                                         |                                     |                       | 44.12      | 96       | 197    | 72       | 173    | 8.00E-07  | 40.9      |
| oohA-DB(70:11084:1437(725:4715:1468(61))                                     | FB000210009(70:11084:1437(725:4715:1468(61))                        | FB000210367(70:11084:1437(725:4715:1468(61))                   | 4468(new :                                                                              | oohA-DB.exon.3                      | oohA-DB.exon.3        | 36.84      | 2218     | 2105   | 938      | 825    | 3.00E-40  | 29.5      |
| glic1alpha-DB(43:176:244:314:551:686:839:1019:1126:1263:1251:1368*(11))      | FB000198248(43:176:244:314:551:686:839:1019:1126:1251)              | FB000241336(43:176:244:314:551:699:690:839:1019:1126:1251)     | 1368(new eat:                                                                           | glic1alpha-DB.intron.11             | glic1alpha-DB.exon.11 |            |          |        |          |        |           |           |
|                                                                              |                                                                     |                                                                |                                                                                         |                                     |                       | 100        | 6960     | 7001   | 3        | 104    | 5.00E-20  | 89        |
| shagap-DB(28:305:1481:1485*(31))                                             | FB000197864(28:305)                                                 | FB000226327(28:305)                                            | 1481(new eat:                                                                           | shagap-DB.exon.3                    | shagap-DB.exon.3      | 28.85      | 651      | 806    | 27       | 182    | 2.00E-07  | 40.9      |
| omocur-DB(2055*(11:3035*(2113244))                                           | FB000207072(3089:3244)                                              | FB000215700(3089:3244)                                         | 2055(new eat:3035 new eat:                                                              | omocur-DB.exon.1                    | omocur-DB.exon.1      |            |          |        |          |        |           |           |
|                                                                              |                                                                     |                                                                |                                                                                         |                                     |                       | 57.14      | 1492     | 1576   | 1039     | 1122   | 3.00E-19  | 64.9      |
| OD13582-PA(1714*(113005*(21))                                                | FB000208733()                                                       | FB00021464()                                                   | 1714(new :3005 new :                                                                    | OD13582-PA.exon.1                   | OD13582-PA.exon.3     |            |          |        |          |        |           |           |
|                                                                              |                                                                     |                                                                |                                                                                         | OD13582-PA.exon.1                   | OD13582-PA.exon.3     | 65.87      | 718      | 1987   | 876      | 1543   | 6.00E-174 | 166       |
|                                                                              |                                                                     |                                                                |                                                                                         | OD13582-PA.exon.1                   | OD13582-PA.exon.3     | 56.9       | 344      | 711    | 323      | 670    | 6.00E-174 | 164       |
|                                                                              |                                                                     |                                                                |                                                                                         | OD13582-PA.exon.1                   | OD13582-PA.exon.2     | 49.54      | 152      | 363    | 98       | 319    | 6.00E-174 | 164       |
|                                                                              |                                                                     |                                                                |                                                                                         | OD13582-PA.exon.1                   | OD13582-PA.exon.2     | 49.8       | 928      | 1683   | 520      | 1275   | 1.00E-138 | 100       |
|                                                                              |                                                                     |                                                                |                                                                                         | OD13582-PA.exon.2                   | OD13582-PA.exon.3     | 63.82      | 408      | 697    | 4        | 207    | 1.00E-138 | 148       |
|                                                                              |                                                                     |                                                                |                                                                                         | OD13582-PA.exon.2                   | OD13582-PA.exon.3     | 72.04      | 723      | 1185   | 893      | 1549   | 3.00E-142 | 250       |
|                                                                              |                                                                     |                                                                |                                                                                         | OD13582-PA.exon.2                   | OD13582-PA.exon.3     | 65.87      | 4        | 294    | 365      | 655    | 3.00E-140 | 127       |
| OD11718-PA(90*(11239*(211073*(31105))                                        | FB000213628(457)                                                    | FB000210345(1105)                                              | 1071(new 1139 new 90 new :                                                              | OD11718-PA.exon.3                   | OD11718-PA.exon.3     | 38.1       | 805      | 743    | 601      | 539    | 3.00E-49  | 52.8      |
| Mat39FB-DB(705:875:1252*(311860*(412021*(512376*(61))                        | FB000206919(705:875:1252)                                           | FB000225737(705:875:1279)                                      | 1860(dup eat:1021 dup eat:1252 new eat:2376 new eat:1856 new eat:2659 new eat:948 new : | Mat39FB-PA.exon.1                   | Mat39FB-PA.exon.4     |            |          |        |          |        |           |           |
|                                                                              |                                                                     |                                                                |                                                                                         | Mat39FB-PA.exon.3                   | Mat39FB-PA.exon.6     | 61.39      | 85       | 690    | 1        | 606    | 3.00E-85  | 259       |
|                                                                              |                                                                     |                                                                |                                                                                         |                                     |                       | 63.45      | 6        | 353    | 6        | 353    | 1.00E-39  | 146       |
| OC32972-PA(103:596:3034:5172:3380:3610*(613638*(71))                         | FB000207106(103:596:3034:3572:3380)                                 | FB000205228(103:844:3034:3572:3380)                            | 3610(dup :3838 new :                                                                    | OC32972-PA.exon.3                   | OC32972-PA.exon.3     |            |          |        |          |        |           |           |
|                                                                              |                                                                     |                                                                |                                                                                         | OC32972-PA.exon.8                   | OC32972-PA.exon.8     | 44.44      | 241      | 188    | 79       | 26     | 0         | 21.7      |
|                                                                              |                                                                     |                                                                |                                                                                         |                                     |                       | 83.33      | 451      | 212    | 348      | 45     | 0         | 543       |
| OD516-DB(154:280:820*(81))                                                   | FB000215818(154:280:1017:530)                                       | FB000209820(154:280)                                           | 820(dup eat:                                                                            | OD516-DB.exon.1                     | OD516-DB.exon.3       |            |          |        |          |        |           |           |
|                                                                              |                                                                     |                                                                |                                                                                         | OD516-DB.exon.2                     | OD516-DB.exon.4       | 34.29      | 19       | 133    | 315      | 419    | 9.00E-08  | 32.2      |
|                                                                              |                                                                     |                                                                |                                                                                         | OD516-DB.exon.3                     | OD516-DB.exon.4       | 50         | 67       | 222    | 70       | 225    | 5.00E-16  | 67        |
|                                                                              |                                                                     |                                                                |                                                                                         |                                     |                       | 61.64      | 78       | 165    | 310      | 387    | 2.00E-07  | 39.6      |
| OD981-DB(1264:1268*(311348*(213420*(312587))                                 | FB000208505(2587)                                                   | FB00021556(2587)                                               | 1264(new eat:1348 new eat:1420 new eat:                                                 | OD981-PA.exon.1                     | OD981-PA.exon.2       |            |          |        |          |        |           |           |
|                                                                              |                                                                     |                                                                |                                                                                         |                                     |                       | 72         | 1069     | 1143   | 7        | 81     | 5.00E-08  | 43.2      |
| OD13569-DB(621:729:948*(311491*(411596*(511856*(612400*(712659*(812659*(91)) | FB000209254(211:621:729)                                            | FB000225161(621)                                               | 1491(dup eat:1596 dup eat:1400 dup eat:2499 dup eat:1856 new eat:2659 new eat:948 new : | OD13569-PA.exon.1                   | OD13569-PA.exon.7     |            |          |        |          |        |           |           |
|                                                                              |                                                                     |                                                                |                                                                                         | OD13569-PA.exon.1                   | OD13569-PA.exon.4     | 53.49      | 501      | 45     | 431      | 8      | 0.00E-53  | 150       |
|                                                                              |                                                                     |                                                                |                                                                                         | OD13569-PA.exon.1                   | OD13569-PA.exon.4     | 54.84      | 211      | 501    | 140      | 430    | 4.00E-50  | 134       |
|                                                                              |                                                                     |                                                                |                                                                                         | OD13569-PA.exon.2                   | OD13569-PA.exon.5     | 60         | 156      | 223    | 50       | 124    | 4.00E-50  | 134.5     |
|                                                                              |                                                                     |                                                                |                                                                                         | OD13569-PA.exon.2                   | OD13569-PA.exon.5     | 70         | 91       | 2      | 81       | 4      | 0.00E-13  | 66.1      |
|                                                                              |                                                                     |                                                                |                                                                                         | OD13569-PA.exon.3                   | OD13569-PA.exon.6     | 67.88      | 2        | 85     | 2        | 85     | 4.00E-12  | 52.8      |
|                                                                              |                                                                     |                                                                |                                                                                         | OD13569-PA.exon.3                   | OD13569-PA.exon.6     | 63.46      | 2        | 157    | 2        | 157    | 2.00E-25  | 56.2      |
|                                                                              |                                                                     |                                                                |                                                                                         | OD13569-PA.exon.4                   | OD13569-PA.exon.7     | 61.11      | 2        | 163    | 2        | 163    | 2.00E-24  | 56.5      |
|                                                                              |                                                                     |                                                                |                                                                                         | OD13569-PA.exon.4                   | OD13569-PA.exon.7     | 48.44      | 155      | 538    | 156      | 539    | 1.00E-54  | 159       |
|                                                                              |                                                                     |                                                                |                                                                                         | OD13569-PA.exon.5                   | OD13569-PA.exon.8     | 41.7       | 09       | 157    | 18       | 155    | 1.00E-18  | 108       |
|                                                                              |                                                                     |                                                                |                                                                                         | OD13569-PA.exon.6                   | OD13569-PA.exon.9     | 75         | 2        | 85     | 2        | 85     | 1.00E-12  | 54.7      |
|                                                                              |                                                                     |                                                                |                                                                                         |                                     |                       | 65.38      | 2        | 157    | 2        | 157    | 8.00E-26  | 100       |
| OD1334-DB(615*(311051))                                                      | FB000220384(149:350:1051:1200)                                      | FB000197778()                                                  | 617(new eat:                                                                            | OD1334-DB.exon.3                    | OD1334-DB.exon.2      |            |          |        |          |        |           |           |
|                                                                              |                                                                     |                                                                |                                                                                         |                                     |                       | 100        | 316      | 357    | 76       | 117    | 9.00E-04  | 34.1      |
| Slp1-PA(605:341:617*(21))                                                    | FB000208751()                                                       | FB000219876()                                                  | 605(new eat:651 new eat:                                                                | Slp1-PA.exon.3                      | Slp1-PA.exon.3        |            |          |        |          |        |           |           |
|                                                                              |                                                                     |                                                                |                                                                                         |                                     |                       | 60         | 613      | 604    | 712      | 763    | 2.00E-140 | 146       |
| shakB-DB(101*(11537*(21451*(31841:996:1061:1228:1407))                       | FB000206059(841:996:1061:1228:1407)                                 | FB000222046(841:996:1061:1228:1407)                            | 360(new eat:517 new eat:651 new eat:                                                    | shakB-DB.intron.4                   | shakB-DB.exon.4       |            |          |        |          |        |           |           |
|                                                                              |                                                                     |                                                                |                                                                                         | shakB-DB.intron.4                   | shakB-DB.exon.3       | 70.75      | 7902     | 8024   | 2        | 124    | 3.00E-21  | 79.9      |
|                                                                              |                                                                     |                                                                |                                                                                         |                                     |                       | 72.73      | 7767     | 7898   | 1        | 152    | 2.00E-17  | 82.6      |
| TexA1-PC(174*(11241*(2151))                                                  | FB000212697(511)                                                    | FB000201306(511)                                               | 174(new :241 new :                                                                      | TexA1-PC.exon.4                     | TexA1-PC.exon.4       |            |          |        |          |        |           |           |
|                                                                              |                                                                     |                                                                |                                                                                         |                                     |                       | 26         | 978      | 1127   | 749      | 898    | 2.00E-14  | 64.8      |
| OD10512-DB(231*(11183))                                                      | FB000218815(183)                                                    | FB000201096(183)                                               | 231(new eat:                                                                            | OD10512-PA.exon.2                   | OD10512-PA.exon.2     |            |          |        |          |        |           |           |
|                                                                              |                                                                     |                                                                |                                                                                         |                                     |                       | 50         | 606      | 447    | 603      | 552    | 4.00E-07  | 21.7      |
| OD6161-DB(35:385:1061*(311421(4411631))                                      | FB000201339(49:230:1050:1142(1444:1631))                            | FB000202319(49:230:1050:1142(1444:1631))                       | 1068(new eat:                                                                           | OD6161-DB.exon.3                    | OD6161-DB.exon.3      |            |          |        |          |        |           |           |
|                                                                              |                                                                     |                                                                |                                                                                         |                                     |                       | 77.78      | 320      | 294    | 638      | 609    | 4.00E-11  | 60.1      |
| OD13351-DB(228:281*(211571(695))                                             | FB000228171(141:228(1571:695))                                      | FB000224067(141:228(1571:695))                                 | 281(new :                                                                               | OD13351-PA.exon.1                   | OD13351-PA.exon.3     |            |          |        |          |        |           |           |
|                                                                              |                                                                     |                                                                |                                                                                         |                                     |                       | 38.46      | 7        | 84     | 57       | 134    | 5.00E-06  | 32.7      |
| OD13908-DB(258:1036*(21))                                                    | FB000219367(258)                                                    | FB000219367(258)                                               | 1038(new :                                                                              | OD13908-DB.exon.2                   | OD13908-DB.exon.2     |            |          |        |          |        |           |           |
|                                                                              |                                                                     |                                                                |                                                                                         |                                     |                       | 47.05      | 2106     | 2056   | 412      | 372    | 2.00E-11  | 26.3      |
| VecC-DB(88:264:418:782:883:956:1140:1288:1800:1905:1201:2564)                | FB000207134(88:264:418:599:782:883:956:1140:1288:1800:2564)         | FB000225027(88:418:782:883:956:1140:1288:1800:2564)            | 1905(new eat:                                                                           | VecC-PA.exon.11                     | VecC-PA.exon.11       |            |          |        |          |        |           |           |
|                                                                              |                                                                     |                                                                |                                                                                         |                                     |                       | 71.33      | 341      | 331    | 285      | 285    | 3.00E-66  | 127       |

|                             |                    |                      |           |                  |                  |       |     |     |     |     |          |      |
|-----------------------------|--------------------|----------------------|-----------|------------------|------------------|-------|-----|-----|-----|-----|----------|------|
| Ion748-DA(231:494:779*131:) | FB90200328(7:231:) | FB90219011(231:494:) | 779(new): | Ion748-DA-exon_2 | Ion748-DA-exon_4 | 41.25 | 14  | 195 | 7   | 170 | 3,008*12 | 43.4 |
|                             |                    |                      |           | Ion748-DA-exon_3 | Ion748-DA-exon_4 | 59.35 | 189 | 251 | 405 | 500 | 3,008*21 | 55.8 |
|                             |                    |                      |           | Ion748-DA-exon_3 | Ion748-DA-exon_4 | 46.34 | 39  | 161 | 267 | 389 | 3,008*23 | 50.2 |

| <b>M. Musculus</b>                                                                                  |                                                                                                   |                                                                                                    |                                         |                                     |                            |            |          |        |          |        |           |           |
|-----------------------------------------------------------------------------------------------------|---------------------------------------------------------------------------------------------------|----------------------------------------------------------------------------------------------------|-----------------------------------------|-------------------------------------|----------------------------|------------|----------|--------|----------|--------|-----------|-----------|
| GeneID (CDS intron positions; * indicates new intron position)                                      | Ortholog1 (CDS intron positions)                                                                  | Ortholog2 (CDS intron positions)                                                                   | New Intron Position (Type) EST evidence | Internal duplicated Region Query id | Subject id                 | % identity | q. start | q. end | s. start | s. end | e-value   | bit score |
| ENSMUS0000108949(47:131:474*131)                                                                    | ENSBTAT0000029731(131:192:7)                                                                      | ENMTO000039732(4:131:192:7)                                                                        | 474(new:est)                            | ENSMUS0000108949.exon.4             | ENSMUS0000108949.exon.4    | 97.14      | 2488     | 2428   | 2892     | 2590   | 7.00E-08  | 35.4      |
| ENSMUS0000086278(10:4:146:137:263*(6):1370*(1):2)                                                   | ENSBTAT0000005498(10:137:7)                                                                       | ENMTO000037995(10:137:7)                                                                           | 263(new:est;370(new:est)                | ENSMUS0000086278.exon.3             | ENSMUS0000086278.exon.6    | 65.38      | 3        | 80     | 3        | 80     | 1.00E-07  | 40.5      |
| ENSMUS0000079395(1213*(1):1)                                                                        | ENSBTAT0000010877(28:7)                                                                           | ENMTO0000244314(1)                                                                                 | 1213(new:est)                           | ENSMUS0000079395.exon.1             | ENSMUS0000079395.exon.2    | 88.87      | 701      | 792    | 697      | 788    | 8.00E-18  | 79.8      |
|                                                                                                     |                                                                                                   |                                                                                                    |                                         | ENSMUS0000079395.exon.1             | ENSMUS0000079395.exon.2    | 78.95      | 224      | 489    | 223      | 486    | 8.00E-15  | 69.9      |
|                                                                                                     |                                                                                                   |                                                                                                    |                                         | ENSMUS0000079395.exon.1             | ENSMUS0000079395.exon.2    | 57.58      | 29       | 263    | 28       | 124    | 1.00E-07  | 27.7      |
|                                                                                                     |                                                                                                   |                                                                                                    |                                         |                                     |                            |            |          |        |          |        |           | 138       |
| ENSMUS0000097494(1216*(1):1)                                                                        | ENSBTAT0000020977(28:7)                                                                           | ENMTO0000244314(1)                                                                                 | 1216(new:est)                           | ENSMUS0000097494.exon.3             | ENSMUS0000097494.exon.4    | 94.74      | 700      | 776    | 695      | 770    | 5.00E-29  | 119       |
|                                                                                                     |                                                                                                   |                                                                                                    |                                         | ENSMUS0000097494.exon.3             | ENSMUS0000097494.exon.4    | 79.7       | 229      | 307    | 223      | 305    | 5.00E-22  | 65.6      |
|                                                                                                     |                                                                                                   |                                                                                                    |                                         | ENSMUS0000097494.exon.3             | ENSMUS0000097494.exon.4    | 61.62      | 30       | 326    | 28       | 324    | 2.00E-07  | 31.2      |
|                                                                                                     |                                                                                                   |                                                                                                    |                                         |                                     |                            |            |          |        |          |        |           | 139       |
| ENSMUS0000039271(160:287:404*(3):557*(4):724*(5):1)                                                 | ENSBTAT0000029730(287:383:7)                                                                      | ENMTO000032768(160:287:386:7)                                                                      | 404(new:est;557(new:est;724(new:est)    | ENSMUS0000039271.exon.3             | ENSMUS0000039271.exon.4    | 48.28      | 91       | 5      | 91       | 5      | 1.00E-06  | 37.3      |
| ENSMUS00000101295(1216*(1):1)                                                                       | ENSBTAT0000020877(28:7)                                                                           | ENMTO0000244314(1)                                                                                 | 1216(new:est)                           | ENSMUS00000101295.exon.3            | ENSMUS00000101295.exon.4   | 58.24      | 309      | 1129   | 304      | 1122   | 3.00E-138 | 352       |
|                                                                                                     |                                                                                                   |                                                                                                    |                                         | ENSMUS00000101295.exon.3            | ENSMUS00000101295.exon.4   | 60.61      | 30       | 326    | 28       | 324    | 1.00E-138 | 306       |
| ENSMUS0000005678(23:143:197:260:323:386*(7):449:539:691:798)                                        | ENSBTAT0000045513(23:143:197:260:323:449:539:691:798)                                             | ENMTO0000394208(23:143:197:260:323:449:539:691:798)                                                | 386(new:est)                            | ENSMUS0000005678.exon.7             | ENSMUS0000005678.exon.8    | 88.89      | 9        | 44     | 9        | 44     | 5.00E-07  | 40.1      |
| ENSMUS0000016427(106:258:1070:2100*(4):1)                                                           | ENSBTAT0000008414(106:258:1070:2100*(4):1)                                                        | ENMTO0000301421(106:258:1070:2100*(4):1)                                                           | 3010(new)                               | ENSMUS0000016427.exon.4             | ENSMUS0000016427.exon.4    | 42.43      | 170      | 170    | 1531     | 1631   | 5.00E-06  | 36.6      |
| ENSMUS0000072567(119:233:827*(6):192*(6):1)                                                         | ENSBTAT0000024544(119:233:7)                                                                      | ENMTO0000356725(119:233:7)                                                                         | 827(new;920(new)                        | ENSMUS0000072567.exon.6             | ENSMUS0000072567.exon.7    | 75.17      | 3        | 74     | 162      | 233    | 2.00E-11  | 51.6      |
|                                                                                                     |                                                                                                   |                                                                                                    |                                         | ENSMUS0000072567.intron.3           | ENSMUS0000072567.exon.7    | 78.57      | 98       | 181    | 350      | 433    | 4.00E-12  | 55.6      |
|                                                                                                     |                                                                                                   |                                                                                                    |                                         | ENSMUS0000072567.exon.7             | ENSMUS0000072567.exon.7    | 96         | 426      | 500    | 159      | 233    | 5.00E-11  | 41.8      |
| ENSMUS0000010961(77:4:134:637*(4):1)                                                                | ENSBTAT0000039732(77:4:134:666:7)                                                                 | ENSBTAT0000040334(134:140:147:243:9)                                                               | 537(new:est)                            | ENSMUS0000010961.intron.2           | ENSMUS0000010961.exon.5    | 100        | 6673     | 6754   | 2        | 86     | 2.00E-13  | 72.1      |
|                                                                                                     |                                                                                                   |                                                                                                    |                                         | ENSMUS0000010961.intron.2           | ENSMUS0000010961.exon.1    | 100        | 61127    | 61047  | 81       | 1      | 8.00E-12  | 67        |
| ENSMUS000003782(77:4:134:276*(3):1)                                                                 | ENSBTAT0000039732(77:4:134:192:7)                                                                 | ENSBTAT000005056208(134:140:102:1277:7)                                                            | 276(new:est)                            | ENSMUS000003782.exon.4              | ENSMUS000003782.exon.4     | 89.47      | 1880     | 1911   | 1380     | 1417   | 3.00E-04  | 64.1      |
| ENSMUS000005939(1189*(1):1)                                                                         | ENSBTAT0000020977(28:7)                                                                           | ENMTO0000244314(1)                                                                                 | 1189(new:est)                           | ENSMUS000005939.exon.2              | ENSMUS000005939.exon.3     | 94.29      | 672      | 741    | 695      | 764    | 4.00E-25  | 107       |
|                                                                                                     |                                                                                                   |                                                                                                    |                                         | ENSMUS000005939.exon.2              | ENSMUS000005939.exon.3     | 80.40      | 250      | 362    | 353      | 486    | 4.00E-10  | 58        |
|                                                                                                     |                                                                                                   |                                                                                                    |                                         | ENSMUS000005939.exon.2              | ENSMUS000005939.exon.3     | 54.78      | 284      | 1099   | 307      | 1122   | 5.00E-332 | 332       |
|                                                                                                     |                                                                                                   |                                                                                                    |                                         | ENSMUS000005939.exon.2              | ENSMUS000005939.exon.3     | 57.75      | 86       | 524    | 112      | 524    | 5.00E-125 | 157       |
|                                                                                                     |                                                                                                   |                                                                                                    |                                         | ENSMUS000005939.intron.3            | ENSMUS000005939.exon.3     | 93.64      | 1362     | 1497   | 105      | 1485   | 0         | 2032      |
|                                                                                                     |                                                                                                   |                                                                                                    |                                         | ENSMUS000005939.intron.3            | ENSMUS000005939.exon.3     | 82.04      | 4370     | 5104   | 306      | 1040   | 1.00E-114 | 410       |
|                                                                                                     |                                                                                                   |                                                                                                    |                                         | ENSMUS000005939.intron.3            | ENSMUS000005939.exon.2     | 92.62      | 24140    | 25263  | 84       | 1207   | 0         | 1570      |
|                                                                                                     |                                                                                                   |                                                                                                    |                                         | ENSMUS000005939.intron.1            | ENSMUS000005939.exon.2     | 95.54      | 24052    | 24094  | 23       | 67     | 4.00E-13  | 73.8      |
|                                                                                                     |                                                                                                   |                                                                                                    |                                         | ENSMUS000005939.intron.1            | ENSMUS000005939.exon.2     | 87.3       | 4758     | 4820   | 671      | 733    | 1.00E-09  | 61.9      |
|                                                                                                     |                                                                                                   |                                                                                                    |                                         | ENSMUS000005939.intron.3            | ENSMUS000005939.exon.1     | 87.98      | 64845    | 65077  | 1        | 223    | 3.00E-66  | 250       |
|                                                                                                     |                                                                                                   |                                                                                                    |                                         | ENSMUS000005939.intron.3            | ENSMUS000005939.exon.3     | 85.78      | 44849    | 43458  | 1392     | 1      | 0         | 91.7      |
|                                                                                                     |                                                                                                   |                                                                                                    |                                         | ENSMUS000005939.intron.3            | ENSMUS000005939.exon.3     | 65.25      | 4170     | 5369   | 106      | 1305   | 0         | 636       |
|                                                                                                     |                                                                                                   |                                                                                                    |                                         | ENSMUS000005939.intron.1            | ENSMUS000005939.exon.2     | 52.57      | 4371     | 5185   | 284      | 1059   | 6.00E-107 | 347       |
|                                                                                                     |                                                                                                   |                                                                                                    |                                         | ENSMUS000005939.intron.1            | ENSMUS000005939.exon.2     | 57.04      | 4226     | 4267   | 136      | 297    | 6.00E-107 | 289       |
|                                                                                                     |                                                                                                   |                                                                                                    |                                         | ENSMUS000005939.intron.3            | ENSMUS000005939.exon.2     | 39.33      | 4385     | 4119   | 295      | 29     | 3.00E-67  | 101       |
| ENSMUS0000042280(331:718*(2):1363:1)                                                                | ENSBTAT0000037258(59:157:214:258:331:517:646:954:1009:1091:1109:1192:1362:1)                      | ENSBTAT0000028162(59:157:214:258:331:403:517:646:954:1009:1091:1109:1192:1362:1)                   | 718(new)                                | ENSMUS0000042280.exon.1             | ENSMUS0000042280.exon.3    | 30.77      | 124      | 240    | 439      | 555    | 2.00E-06  | 34.8      |
| ENSMUS000004773(4:143:239:362:402:497:419:74(4):1)                                                  | ENSBTAT000004093(143:242:239:278:1285:7)                                                          | ENMTO0000302609(16:143:242:239:312:309:7)                                                          | 497(new;740(new)                        | ENSMUS000004773.intron.3            | ENSMUS000004773.exon.8     | 58.33      | 15       | 86     | 99       | 170    | 2.00E-08  | 42.3      |
|                                                                                                     |                                                                                                   |                                                                                                    |                                         | ENSMUS000004773.exon.2              | ENSMUS000004773.exon.8     | 55.26      | 318      | 611    | 66       | 179    | 7.00E-12  | 57        |
| ENSMUS0000089001(55:121:214:571:617*(5):859:911:988:1042:1068:1226:1400:1408:1)                     | ENSBTAT0000045899(214:565:859:911:988:1043:1068:1226:1400:1408:1)                                 | ENMTO0000312373(55:121:214:565:859:911:988:1043:1068:1226:1400:1408:1)                             | 617(new)                                | ENSMUS0000089001.intron.8           | ENSMUS0000089001.exon.8    | 93.22      | 4416     | 4474   | 73       | 15     | 5.00E-18  | 85.7      |
| ENSMUS0000010808(124*(1):251:274:421:646:812*(9):301)                                               | ENSBTAT0000036427(151:274:421:646:812:936:7)                                                      | ENMTO0000340142(151:274:421:646:812:936:7)                                                         | 14(new:est)                             | ENSMUS0000010808.intron.1           | ENSMUS0000010808.exon.9    | 88.89      | 217      | 252    | 63       | 98     | 4.00E-06  | 40.1      |
| ENSMUS0000003175(150:142:269:401*(7):1)                                                             | ENSBTAT0000021140(269:365:1834:1872:7)                                                            | ENMTO0000315475(142:136:269:365:7)                                                                 | 401(new:est)                            | ENSMUS0000003175.exon.8             | ENSMUS0000003175.exon.8    | 96.25      | 831      | 878    | 411      | 458    | 1.00E-15  | 62.3      |
| ENSMUS0000020227(159:268:411:596:685:826:1138:11290:1493:1668*(10):1738:1)                          | ENSBTAT000008927(159:268:411:596:685:826:1138:11290:1493:1668:1738:1)                             | ENSBTAT0000057061(159:268:411:596:685:826:1142:1169:1226:1257:1290:1493:1589:1738:1)               | 1446(new:est)                           | ENSMUS0000020227.exon.10            | ENSMUS0000020227.exon.10   | 88.89      | 95       | 148    | 35       | 88     | 2.00E-08  | 45.1      |
| ENSMUS0000009443(86:181:221:276:342:415:518*(8):02:697:820:904:1022:947:1060:1132:1226:1431:1526:1) | ENSBTAT0000087076(86:181:221:276:342:415:518:602:697:820:904:1022:947:1060:1132:1226:1431:1526:1) | ENSBTAT0000016813(86:181:221:276:342:415:518:602:697:820:904:1022:1060:1132:1177:1226:1431:1526:1) | 1355(new:est)                           | ENSMUS0000009443.intron.15          | ENSMUS0000009443.intron.16 | 84.25      | 1733     | 1859   | 1        | 127    | 2.00E-20  | 93.7      |
|                                                                                                     |                                                                                                   |                                                                                                    |                                         | ENSMUS0000009443.intron.15          | ENSMUS0000009443.intron.16 | 66.67      | 1163     | 1225   | 3        | 65     | 5.00E-06  | 38.2      |
| ENSMUS0000032796(11:131:233*(4):1)                                                                  | ENSBTAT0000005498(10:200:7)                                                                       | ENSBTAT0000037995(10:200:7)                                                                        | 233(new:est)                            | ENSMUS0000032796.exon.5             | ENSMUS0000032796.exon.5    | 50         | 419      | 478    | 503      | 582    | 0         | 84.5      |
| ENSMUS0000009396(16:143:901*(6):1)                                                                  | ENSBTAT0000043746(16:143:239:7)                                                                   | ENSBTAT0000032762(16:143:239:1336:7)                                                               | 901(new:est)                            | ENSMUS0000009396.intron.6           | ENSMUS0000009396.exon.7    | 73.91      | 7        | 75     | 7        | 75     | 1.00E-11  | 51        |

|                                                                                                                                                                        |                                                                                                                                                                 |                                                                                                                                  |                           |                              |                            |       |        |        |      |      |          |      |
|------------------------------------------------------------------------------------------------------------------------------------------------------------------------|-----------------------------------------------------------------------------------------------------------------------------------------------------------------|----------------------------------------------------------------------------------------------------------------------------------|---------------------------|------------------------------|----------------------------|-------|--------|--------|------|------|----------|------|
| ENSMIST000010899(4131;414*)                                                                                                                                            | ENSBTAT000002297(131;132*)                                                                                                                                      | ENST0000039732(4;131;132*)                                                                                                       | 474(new eat)              | ENSMIST000010899.intron.1    | ENSMIST000010899.exon.1    | 97.06 | 97381  | 97280  | 103  | 2    | 5.00E-16 | 83.5 |
|                                                                                                                                                                        |                                                                                                                                                                 |                                                                                                                                  |                           | ENSMIST000010899.intron.2    | ENSMIST000010899.exon.1    | 94.12 | 63037  | 62936  | 2    | 103  | 1.00E-15 | 81.7 |
|                                                                                                                                                                        |                                                                                                                                                                 |                                                                                                                                  |                           | ENSMIST000010899.intron.3    | ENSMIST000010899.exon.5    | 100   | 50848  | 50756  | 2    | 94   | 4.00E-15 | 79.9 |
|                                                                                                                                                                        |                                                                                                                                                                 |                                                                                                                                  |                           | ENSMIST000010899.intron.1    | ENSMIST000010899.exon.5    | 87.5  | 9642   | 9713   | 2    | 73   | 8.00E-07 | 52.4 |
|                                                                                                                                                                        |                                                                                                                                                                 |                                                                                                                                  |                           | ENSMIST000010899.intron.2    | ENSMIST000010899.exon.2    | 100   | 59424  | 59478  | 55   | 1    | 2.00E-23 | 109  |
| ENSMIST000000919(229;116;459;535;644;697;849;982;1084;1287;1378;1479;1528*(14;1682;1888;2232;2254;2383);2;2254;2383))                                                  | ENSBTAT000003979(229;310;459;535;644;697;849;982;1084;1287;1378;1479;1482;1588;2232;2254;2383))                                                                 | ENST000002297(145;229;310;459;535;644;697;849;982;1084;1241;1287;1378;1479;1682;1888;2232;2254;2383))                            | 1518(new eat)             | ENSMIST000000919.intron.15   | ENSMIST000000919.exon.17   | 96.67 | 407    | 416    | 203  | 232  | 3.00E-09 | 52   |
| ENSMIST000000911(32(15*(1);94;253;329;377;433;449;618;647;784;892);)                                                                                                   | ENSBTAT000000539(94;253;329;377;433;496;518;616;67;784;892);)                                                                                                   | ENST000003259(94;253;329;377;433;496;518;647;784;892);)                                                                          | 15(new eat)               | ENSMIST000000911.intron.2    | ENSMIST000000911.exon.1    | 91.86 | 1558   | 1643   | 262  | 347  | 7.00E-28 | 115  |
| ENSMIST0000106559(6*(2);416;626*(4);)                                                                                                                                  | ENSBTAT000000597(3(16;579);)                                                                                                                                    | ENST00000401057(94;416);)                                                                                                        | 68(new eat;698(new ))     | ENSMIST0000106559.intron.1   | ENSMIST0000106559.exon.3   | 89.49 | 2202   | 2546   | 3    | 347  | 4.00E-64 | 240  |
|                                                                                                                                                                        |                                                                                                                                                                 |                                                                                                                                  |                           | ENSMIST0000106559.intron.2   | ENSMIST0000106559.exon.4   | 81.72 | 16208  | 16486  | 2    | 280  | 4.00E-48 | 187  |
| ENSMIST0000113183(42;6*(2);345;984;)                                                                                                                                   | ENSBTAT0000040359(345;984;)                                                                                                                                     | ENST00000402697(22;345;984;)                                                                                                     | 42(new )                  | ENSMIST0000113183.intron.3   | ENSMIST0000113183.exon.3   | 61.11 | 744    | 691    | 225  | 172  | 2.00E-06 | 33.6 |
|                                                                                                                                                                        |                                                                                                                                                                 |                                                                                                                                  |                           | ENSMIST0000113183.intron.3   | ENSMIST0000113183.exon.3   | 47.06 | 843    | 895    | 121  | 71   | 2.00E-06 | 24.4 |
| ENSMIST0000005933(43;71*(1);357;951;)                                                                                                                                  | ENSBTAT0000003560(357;951;)                                                                                                                                     | ENST0000035728(357;951;)                                                                                                         | 43(new eat)               | ENSMIST0000005933.intron.2   | ENSMIST0000005933.exon.1   | 40.54 | 43     | 153    | 219  | 109  | 3.00E-07 | 40.5 |
| ENSMIST0000004653(31*(1);342;920;927;)                                                                                                                                 | ENSBTAT000002072(342;927;)                                                                                                                                      | ENST0000035726(342;927;)                                                                                                         | 31(new eat)               | ENSMIST0000004653.intron.5   | ENSMIST0000004653.exon.5   | 81.94 | 14761  | 15274  | 152  | 39   | 3.00E-71 | 268  |
|                                                                                                                                                                        |                                                                                                                                                                 |                                                                                                                                  |                           | ENSMIST0000004653.intron.5   | ENSMIST0000004653.exon.5   | 79.92 | 57210  | 57662  | 1    | 473  | 3.00E-46 | 184  |
|                                                                                                                                                                        |                                                                                                                                                                 |                                                                                                                                  |                           | ENSMIST0000004653.intron.5   | ENSMIST0000004653.exon.5   | 96.67 | 14507  | 14536  | 787  | 98   | 3.00E-06 | 52   |
|                                                                                                                                                                        |                                                                                                                                                                 |                                                                                                                                  |                           | ENSMIST0000004653.intron.5   | ENSMIST0000004653.exon.2   | 84.01 | 35171  | 35439  | 37   | 305  | 1.00E-49 | 192  |
|                                                                                                                                                                        |                                                                                                                                                                 |                                                                                                                                  |                           | ENSMIST0000004653.intron.5   | ENSMIST0000004653.exon.2   | 84.94 | 17121  | 17286  | 226  | 61   | 5.00E-30 | 131  |
|                                                                                                                                                                        |                                                                                                                                                                 |                                                                                                                                  |                           | ENSMIST0000004653.intron.5   | ENSMIST0000004653.exon.3   | 80.7  | 56130  | 56499  | 169  | 141  | 3.00E-40 | 165  |
|                                                                                                                                                                        |                                                                                                                                                                 |                                                                                                                                  |                           | ENSMIST0000004653.intron.5   | ENSMIST0000004653.exon.3   | 79.24 | 119173 | 119514 | 55   | 396  | 3.00E-25 | 115  |
|                                                                                                                                                                        |                                                                                                                                                                 |                                                                                                                                  |                           | ENSMIST0000004653.intron.5   | ENSMIST0000004653.exon.3   | 78.45 | 16119  | 16466  | 395  | 48   | 2.00E-19 | 95.6 |
|                                                                                                                                                                        |                                                                                                                                                                 |                                                                                                                                  |                           | ENSMIST0000004653.intron.5   | ENSMIST0000004653.exon.1   | 89.8  | 20475  | 20523  | 72   | 24   | 5.00E-08 | 58   |
|                                                                                                                                                                        |                                                                                                                                                                 |                                                                                                                                  |                           | ENSMIST0000004653.intron.5   | ENSMIST0000004653.exon.6   | 100   | 14450  | 14477  | 28   | 1    | 2.00E-07 | 56   |
|                                                                                                                                                                        |                                                                                                                                                                 |                                                                                                                                  |                           | ENSMIST0000004653.intron.5   | ENSMIST0000004653.exon.5   | 62.9  | 14753  | 15310  | 160  | 3    | 3.00E-79 | 254  |
|                                                                                                                                                                        |                                                                                                                                                                 |                                                                                                                                  |                           | ENSMIST0000004653.intron.5   | ENSMIST0000004653.exon.5   | 54.55 | 14592  | 14690  | 721  | 623  | 3.00E-79 | 245  |
|                                                                                                                                                                        |                                                                                                                                                                 |                                                                                                                                  |                           | ENSMIST0000004653.intron.5   | ENSMIST0000004653.exon.5   | 39.39 | 14705  | 14908  | 608  | 805  | 3.00E-66 | 207  |
|                                                                                                                                                                        |                                                                                                                                                                 |                                                                                                                                  |                           | ENSMIST0000004653.intron.5   | ENSMIST0000004653.exon.3   | 56.25 | 55969  | 56024  | 2    | 49   | 4.00E-59 | 190  |
|                                                                                                                                                                        |                                                                                                                                                                 |                                                                                                                                  |                           | ENSMIST0000004653.intron.5   | ENSMIST0000004653.exon.3   | 61.11 | 16512  | 16789  | 2    | 325  | 2.00E-52 | 190  |
|                                                                                                                                                                        |                                                                                                                                                                 |                                                                                                                                  |                           | ENSMIST0000004653.intron.5   | ENSMIST0000004653.exon.3   | 51.67 | 16140  | 15961  | 374  | 553  | 2.00E-52 | 190  |
|                                                                                                                                                                        |                                                                                                                                                                 |                                                                                                                                  |                           | ENSMIST0000004653.intron.5   | ENSMIST0000004653.exon.3   | 56.28 | 16511  | 15963  | 3    | 551  | 1.00E-48 | 190  |
|                                                                                                                                                                        |                                                                                                                                                                 |                                                                                                                                  |                           | ENSMIST0000004653.intron.5   | ENSMIST0000004653.exon.2   | 68.93 | 35135  | 35443  | 1    | 309  | 9.00E-41 | 164  |
|                                                                                                                                                                        |                                                                                                                                                                 |                                                                                                                                  |                           | ENSMIST0000004653.intron.5   | ENSMIST0000004653.exon.2   | 65.31 | 17343  | 17050  | 4    | 297  | 7.00E-37 | 151  |
| ENSMIST00000053910(14*(2);385;445;742;)                                                                                                                                | ENSBTAT0000042316(185;445;742;)                                                                                                                                 | ENST00000001160(1)                                                                                                               | 14(new eat)               | ENSMIST00000053910.intron.2  | ENSMIST00000053910.exon.3  | 91.89 | 14657  | 14693  | 19   | 55   | 5.00E-06 | 50.1 |
| ENSMIST0000004493(35*(2);170;369;435;601;733;853;912;53;912;979;1176;1242;1341;1503;1615;1693;1824;1846;199;203;222;2496;2639;2601;2751;2848;)                         | ENSBTAT000003268(170;369;435;601;733;853;912;979;1176;1242;1341;1503;1615;1693;1824;1846;199;203;222;2496;2639;2601;2751;2848;)                                 | ENST000003268(170;369;435;601;733;853;912;979;1176;1242;1341;1503;1615;1693;1824;1998;2095;2;253;2322;2496;2639;2601;2751;2848;) | 38(new eat)               | ENSMIST0000004493.intron.3   | ENSMIST0000004493.exon.3   | 100   | 56     | 76     | 112  | 132  | 3.00E-06 | 42.1 |
| ENSMIST0000003265(77;182;426*(3);365*(4);704*(44;860);)                                                                                                                | ENSBTAT0000005975(66;182;704;844;950;)                                                                                                                          | ENST000003265(77;182;704;844;950;)                                                                                               | 428(dup eat;558(dup eat)) | ENSMIST0000003265.exon.3     | ENSMIST0000003265.exon.5   | 97.37 | 1246   | 1233   | 138  | 25   | 1.00E-23 | 95.9 |
|                                                                                                                                                                        |                                                                                                                                                                 |                                                                                                                                  |                           | ENSMIST0000003265.exon.3     | ENSMIST0000003265.exon.4   | 75.56 | 110    | 244    | 2    | 136  | 8.00E-21 | 86.3 |
|                                                                                                                                                                        |                                                                                                                                                                 |                                                                                                                                  |                           | ENSMIST0000003265.exon.4     | ENSMIST0000003265.exon.5   | 84.44 | 2      | 136    | 2    | 136  | 4.00E-21 | 62.7 |
| ENSMIST00000041860(184;288;382;442;541;635;713;859;942;1099;1321;1476;1624;1707;172;205*(17);13)                                                                       | ENSBTAT0000001177(288;382;442;541;635;713;859;942;1099;1321;1476;1624;)                                                                                         | ENST0000037421(288;382;442;541;635;713;859;942;1099;1321;1476;1624;1707;172;1700;1775;)                                          | 2054(new eat)             | ENSMIST00000041860.intron.16 | ENSMIST00000041860.exon.18 | 97.8  | 19422  | 19350  | 1040 | 768  | 2.00E-93 | 229  |
|                                                                                                                                                                        |                                                                                                                                                                 |                                                                                                                                  |                           | ENSMIST00000041860.intron.16 | ENSMIST00000041860.exon.18 | 90.18 | 19304  | 19172  | 773  | 591  | 2.00E-93 | 229  |
| ENSMIST000000787(85*(1);1119;1374;1481;1581;1614;1645;1753;1870;1986;2159;2307;2371;2556;2659;2823;297;1;3124;3251;3345;3478;3679;3674;3899;4046;4243;4265;4442;4580;) | ENSBTAT000007850(1119;1374;1481;1581;1614;1645;1753;1870;1986;2159;2307;2371;2556;2659;2823;297;1;3124;3251;3345;3478;3679;3674;3899;4046;4243;4265;4442;4580;) | ENST000002297(1198;2159;2307;2371;2556;2659;2823;297;4084;4243;4366;4441;4580;)                                                  | 857(new eat)              | ENSMIST000000787.intron.1    | ENSMIST00000047817.exon.2  | 97.1  | 1      | 69     | 1    | 69   | 2.00E-30 | 121  |
|                                                                                                                                                                        |                                                                                                                                                                 |                                                                                                                                  |                           | ENSMIST00000047817.exon.3    | ENSMIST00000047817.exon.10 | 100   | 1765   | 1735   | 1715 | 1686 | 0        | 537  |
| ENSMIST0000101548(157;151*(1);379;485;)                                                                                                                                | ENSBTAT0000005577(379;485;)                                                                                                                                     | ENST0000031765(379;485;)                                                                                                         | 157(new )                 | ENSMIST0000101548.intron.2   | ENSMIST0000101548.exon.2   | 94.12 | 117342 | 117562 | 2    | 222  | 5.00E-91 | 335  |
|                                                                                                                                                                        |                                                                                                                                                                 |                                                                                                                                  |                           | ENSMIST0000101548.intron.2   | ENSMIST0000101548.exon.1   | 94.67 | 117188 | 117337 | 1    | 150  | 1.00E-60 | 234  |
|                                                                                                                                                                        |                                                                                                                                                                 |                                                                                                                                  |                           | ENSMIST0000101548.intron.2   | ENSMIST0000101548.exon.3   | 95.28 | 118993 | 119058 | 1    | 106  | 2.00E-41 | 170  |
|                                                                                                                                                                        |                                                                                                                                                                 |                                                                                                                                  |                           | ENSMIST0000101548.intron.2   | ENSMIST0000101548.exon.3   | 91.84 | 1398   | 1493   | 1    | 98   | 2.00E-29 | 131  |
|                                                                                                                                                                        |                                                                                                                                                                 |                                                                                                                                  |                           | ENSMIST0000101548.intron.2   | ENSMIST0000101548.exon.4   | 94.9  | 5105   | 5201   | 1    | 98   | 3.00E-34 | 147  |
| ENSMIST00000089334(14*(1);2823;2959;3018;3049;3210;337;210;3370;3458;3509;3568;3640;3709;3793;3873;3973;4111;4241;4275;4504;4659;)                                     | ENSBTAT0000016893(2823;2959;3018;3049;3210;337;458;3509;3568;3640;3709;3793;3873;3973;4111;4241;4275;4504;4659;)                                                | ENST0000028504(2823;2959;3018;3049;3210;3370;3;458;3509;3568;3640;3709;3793;3873;3973;4111;4241;4275;4504;4659;)                 | 14(new eat)               | ENSMIST00000089334.exon.2    | ENSMIST00000089334.exon.2  | 72.22 | 465    | 412    | 570  | 517  | 0        | 233  |
| ENSMIST00000068340(42;6*(2);345;984;)                                                                                                                                  | ENSBTAT0000040359(345;984;)                                                                                                                                     | ENST00000402697(22;345;984;)                                                                                                     | 42(new )                  | ENSMIST00000068340.intron.3  | ENSMIST00000068340.exon.3  | 61.11 | 744    | 691    | 225  | 172  | 2.00E-06 | 33.6 |
|                                                                                                                                                                        |                                                                                                                                                                 |                                                                                                                                  |                           | ENSMIST00000068340.intron.3  | ENSMIST00000068340.exon.3  | 47.06 | 845    | 895    | 121  | 71   | 2.00E-06 | 24.4 |

|                                              |                                         |                                                                 |              |                             |                           |       |       |       |     |     |          |      |
|----------------------------------------------|-----------------------------------------|-----------------------------------------------------------------|--------------|-----------------------------|---------------------------|-------|-------|-------|-----|-----|----------|------|
| ENSMUST00000091522 143;692; 21;              | ENST00000140708 143;249;1406;2856;3470; | ENST00000000528 143;154;187;233;706;2330;2344;12352;2781;12782; | 692 new est; | ENSMUST00000091522.exon.3   | ENSMUST00000091522.exon.3 | 54.04 | 2573  | 2713  | 252 | 392 | 2.00E-09 | 48   |
| ENSMUST00000108894 62;837; 2; 7757;836;1007; | ENST000000000146 62;810;757;836;1007;   | ENST000000250091 62;810;757;836;1007;                           | 837 new ;    | ENSMUST00000108894.exon.2   | ENSMUST00000108894.exon.2 | 100   | 201   | 187   | 129 | 115 | 2.00E-39 | 25.8 |
| ENSMUST00000088331 6*; 2; 126;               | ENST000000003874 137;                   | ENST00000110248 1                                               | 6 new est;   | ENSMUST00000088331.exon.2   | ENSMUST00000088331.exon.3 | 98.33 | 1     | 120   | 1   | 120 | 4.00E-61 | 222  |
|                                              |                                         |                                                                 |              | ENSMUST00000088331.intron.2 | ENSMUST00000088331.exon.4 | 96.97 | 1627  | 2579  | 1   | 956 | 0        | 1661 |
|                                              |                                         |                                                                 |              | ENSMUST00000088331.intron.2 | ENSMUST00000088331.exon.1 | 97.76 | 14513 | 14646 | 37  | 170 | 8.00E-65 | 242  |

| H. sapiens                                                                                                                                                                                         |                                                                                                                                                                                                      |                                                                                                                                                                                                      |                                                                    |                            |                        |            |            |          |        |          |           |         |           |
|----------------------------------------------------------------------------------------------------------------------------------------------------------------------------------------------------|------------------------------------------------------------------------------------------------------------------------------------------------------------------------------------------------------|------------------------------------------------------------------------------------------------------------------------------------------------------------------------------------------------------|--------------------------------------------------------------------|----------------------------|------------------------|------------|------------|----------|--------|----------|-----------|---------|-----------|
| GeneID (CDS intron positions; * indicates new intron position)                                                                                                                                     | Ortholog1 (CDS intron positions)                                                                                                                                                                     | Ortholog2 (CDS intron positions)                                                                                                                                                                     | New Intron Position (Type) EST evidence                            | Internal duplicated Region | Query id               | Subject id | % identity | q. start | q. end | s. start | s. end    | e-value | bit score |
| ENST00000320491(299*(1))                                                                                                                                                                           | ENSMST00000053911(1)                                                                                                                                                                                 | ENSBTAG0000031236(33)                                                                                                                                                                                | 299(new)                                                           | ENST00000320491.intron.1   | ENST00000320491.exon.2 | 74.09      | 1          | 660      | 4      | 661      | 0         | 993     |           |
|                                                                                                                                                                                                    |                                                                                                                                                                                                      |                                                                                                                                                                                                      |                                                                    | ENST00000320491.exon.1     | ENST00000320491.exon.1 | 88.35      | 1131       | 11569    | 41     | 289      | 5.00E-76  | 274     |           |
|                                                                                                                                                                                                    |                                                                                                                                                                                                      |                                                                                                                                                                                                      |                                                                    | ENST00000320491.intron.2   | ENST00000320491.exon.1 | 80.82      | 11293      | 11293    | 233    | 3        | 1.00E-40  | 238     |           |
|                                                                                                                                                                                                    |                                                                                                                                                                                                      |                                                                                                                                                                                                      |                                                                    |                            |                        |            |            |          |        |          |           |         |           |
|                                                                                                                                                                                                    |                                                                                                                                                                                                      |                                                                                                                                                                                                      |                                                                    |                            |                        |            |            |          |        |          |           |         |           |
| ENST00000337801(124*(1);608(728))                                                                                                                                                                  | ENSMST0000005976(608(728))                                                                                                                                                                           | ENSBTAG000004395(608(648(728)))                                                                                                                                                                      | 124(new)                                                           | ENST00000337801.exon.2     | ENST00000337801.exon.2 | 63.64      | 354        | 322      | 225    | 194      | 1.00E-40  | 22.2    |           |
|                                                                                                                                                                                                    |                                                                                                                                                                                                      |                                                                                                                                                                                                      |                                                                    |                            |                        |            |            |          |        |          |           |         |           |
| ENST00000303766(110(217);339(548);663(8);774*(7);1889(8);896(19)(1110;1189))                                                                                                                       | ENSMST0000007698(110(217);339(548);763(1110;1189))                                                                                                                                                   | ENSMST0000014736(110(217);339(548);763(1110;1189))                                                                                                                                                   | 691(dup);1774(dup);683(dup);1889(dup);896(dup);1110(dup);1189(dup) | ENST00000303766.exon.7     | ENST00000303766.exon.2 | 86.11      | 110        | 3        | 110    | 3        | 7.00E-19  | 77.6    |           |
|                                                                                                                                                                                                    |                                                                                                                                                                                                      |                                                                                                                                                                                                      |                                                                    | ENST00000303766.exon.8     | ENST00000303766.exon.8 | 77.78      | 2          | 109      | 2      | 109      | 6.00E-17  | 91      |           |
|                                                                                                                                                                                                    |                                                                                                                                                                                                      |                                                                                                                                                                                                      |                                                                    | ENST00000303766.exon.7     | ENST00000303766.exon.9 | 62         | 121        | 3        | 101    | 3        | 8.00E-13  | 57.4    |           |
|                                                                                                                                                                                                    |                                                                                                                                                                                                      |                                                                                                                                                                                                      |                                                                    | ENST00000303766.exon.8     | ENST00000303766.exon.9 | 90.91      | 2          | 100      | 2      | 100      | 2.00E-19  | 79.4    |           |
|                                                                                                                                                                                                    |                                                                                                                                                                                                      |                                                                                                                                                                                                      |                                                                    | ENST00000303766.exon.8     | ENST00000303766.exon.1 | 77.78      | 2          | 109      | 2      | 109      | 1.00E-16  | 70.3    |           |
|                                                                                                                                                                                                    |                                                                                                                                                                                                      |                                                                                                                                                                                                      |                                                                    | ENST00000303766.exon.9     | ENST00000303766.exon.1 | 66.67      | 2          | 100      | 2      | 100      | 4.00E-12  | 55.2    |           |
|                                                                                                                                                                                                    |                                                                                                                                                                                                      |                                                                                                                                                                                                      |                                                                    | ENST00000303766.intron.9   | ENST00000303766.exon.1 | 83.33      | 435        | 542      | 2      | 109      | 4.00E-17  | 79.8    |           |
|                                                                                                                                                                                                    |                                                                                                                                                                                                      |                                                                                                                                                                                                      |                                                                    | ENST00000303766.intron.9   | ENST00000303766.exon.7 | 80.56      | 435        | 542      | 2      | 109      | 7.00E-17  | 74.8    |           |
|                                                                                                                                                                                                    |                                                                                                                                                                                                      |                                                                                                                                                                                                      |                                                                    | ENST00000303766.intron.9   | ENST00000303766.exon.8 | 83.33      | 435        | 542      | 2      | 109      | 1.00E-16  | 74.6    |           |
|                                                                                                                                                                                                    |                                                                                                                                                                                                      |                                                                                                                                                                                                      |                                                                    | ENST00000303766.intron.9   | ENST00000303766.exon.9 | 74.73      | 435        | 543      | 2      | 100      | 5.00E-12  | 69.9    |           |
|                                                                                                                                                                                                    |                                                                                                                                                                                                      |                                                                                                                                                                                                      |                                                                    |                            |                        |            |            |          |        |          |           |         |           |
| ENST00000398732(170(270);827*(3))                                                                                                                                                                  | ENSMST00000066208(170(268);1052)                                                                                                                                                                     | ENSMST00000078817(27(2);48(170);268(1003))                                                                                                                                                           | 827(new)                                                           | ENST00000398732.intron.3   | ENST00000398732.exon.1 | 79.07      | 33024      | 33024    | 34     | 152      | 3.00E-17  | 86.3    |           |
|                                                                                                                                                                                                    |                                                                                                                                                                                                      |                                                                                                                                                                                                      |                                                                    | ENST00000398732.intron.3   | ENST00000398732.exon.2 | 45.82      | 33552      | 33747    | 3      | 98       | 9.00E-08  | 53.3    |           |
|                                                                                                                                                                                                    |                                                                                                                                                                                                      |                                                                                                                                                                                                      |                                                                    |                            |                        |            |            |          |        |          |           |         |           |
| ENST00000292414(12(166);219(319);433(522);671(7);89(866);1027(1254);1417(1488)(13);1599(14))                                                                                                       | ENSBTAG0000007170(12(166);219(319);433(522);671(7);89(866);1027(1254);1417(1488))                                                                                                                    | ENSMST00000031741(12(166);219(319);433(522);671(7);89(866);1027(1254);1417(1488))                                                                                                                    | 1498(new);1599(new)                                                | ENST00000292414.exon.2     | ENST00000292414.exon.1 | 80         | 3          | 92       | 10     | 399      | 2.00E-17  | 73.5    |           |
|                                                                                                                                                                                                    |                                                                                                                                                                                                      |                                                                                                                                                                                                      |                                                                    | ENST00000292414.intron.13  | ENST00000292414.exon.1 | 74.14      | 5378       | 5551     | 3      | 176      | 5.00E-25  | 107     |           |
|                                                                                                                                                                                                    |                                                                                                                                                                                                      |                                                                                                                                                                                                      |                                                                    |                            |                        |            |            |          |        |          |           |         |           |
| ENST00000312161(30(31);150(2124*(1));2338(240(9);2577))                                                                                                                                            | ENSBTAG0000014281(350(278);2109(2238);2409(2577))                                                                                                                                                    | ENSMST00000106045(30(31);150(2106);2338(2409(2577)))                                                                                                                                                 | 2124(new);2577(new)                                                | ENST00000312161.exon.4     | ENST00000312161.exon.4 | 30.56      | 430        | 537      | 256    | 363      | 1.00E-136 | 146     |           |
|                                                                                                                                                                                                    |                                                                                                                                                                                                      |                                                                                                                                                                                                      |                                                                    |                            |                        |            |            |          |        |          |           |         |           |
| ENST00000398399(127(413);947*(13))                                                                                                                                                                 | ENSBTAG0000037060(413(652))                                                                                                                                                                          | ENSMST0000016587(127(188);413(754(715)))                                                                                                                                                             | 947(new);1587(new)                                                 | ENST00000398399.exon.4     | ENST00000398399.exon.4 | 66.67      | 1384       | 1349     | 964    | 920      | 0         | 714     |           |
|                                                                                                                                                                                                    |                                                                                                                                                                                                      |                                                                                                                                                                                                      |                                                                    |                            |                        |            |            |          |        |          |           |         |           |
| ENST00000298932(155(220);376(502);881(663);788(84);1006(1164);1281(1366);1451(1533);2029(2126(12366);2437(2557);2548(2585);4396))                                                                  | ENSMST0000014115(12(155);208(376);502(881);666(788);84(1006);1164(1281);1366(1451);1533(2029(2126);2437(2557);2548(2585);4396))                                                                      | ENSMST000000060(155(208);376(502);881(663);788(84);1006(1164);1281(1366);1451(1533);2029(2126);2437(2557);2548(2585);4396))                                                                          | 2116(new);2585(new)                                                | ENST00000298932.intron.19  | ENST00000298932.exon.1 | 94.12      | 696        | 544      | 65     | 217      | 3.00E-32  | 126     |           |
|                                                                                                                                                                                                    |                                                                                                                                                                                                      |                                                                                                                                                                                                      |                                                                    |                            |                        |            |            |          |        |          |           |         |           |
| ENST00000302699(146(273);377(626);802(1006*(6);1049(1355))                                                                                                                                         | ENSMST0000003483(146(273);377(626);802(1049(1355)))                                                                                                                                                  | ENSBTAG0000018926(146(273);377(626);802(1049(1355)))                                                                                                                                                 | 1006(new);1355(new)                                                | ENST00000302699.intron.7   | ENST00000302699.exon.4 | 88.11      | 212        | 354      | 67     | 208      | 8.00E-37  | 141     |           |
|                                                                                                                                                                                                    |                                                                                                                                                                                                      |                                                                                                                                                                                                      |                                                                    |                            |                        |            |            |          |        |          |           |         |           |
| ENST00000404756(16(113*(2));267(41*(4);435*(8);524(533(700)))                                                                                                                                      | ENSMST00000024591(66(267);533(700))                                                                                                                                                                  | ENSBTAG00000037576(62(267);533(700))                                                                                                                                                                 | 113(new);415(new);435(new)                                         | ENST00000404756.intron.1   | ENST00000404756.exon.3 | 91.45      | 151        | 341      | 1      | 152      | 2.00E-50  | 190     |           |
|                                                                                                                                                                                                    |                                                                                                                                                                                                      |                                                                                                                                                                                                      |                                                                    | ENST00000404756.intron.1   | ENST00000404756.exon.4 | 59.9       | 438        | 536      | 1      | 59       | 2.00E-28  | 117     |           |
|                                                                                                                                                                                                    |                                                                                                                                                                                                      |                                                                                                                                                                                                      |                                                                    | ENST00000404756.intron.1   | ENST00000404756.exon.8 | 85.1       | 2900       | 2746     | 5      | 152      | 6.00E-13  | 63.8    |           |
|                                                                                                                                                                                                    |                                                                                                                                                                                                      |                                                                                                                                                                                                      |                                                                    | ENST00000404756.intron.1   | ENST00000404756.exon.9 | 64         | 2874       | 2948     | 1      | 75       | 2.00E-08  | 48.7    |           |
|                                                                                                                                                                                                    |                                                                                                                                                                                                      |                                                                                                                                                                                                      |                                                                    |                            |                        |            |            |          |        |          |           |         |           |
| ENST00000398291(436(500*(2));529(535);769(766(782);893))                                                                                                                                           | ENSBTAG0000003889(436(535);769(766(792);893))                                                                                                                                                        | ENSMST0000008760(436(535);769(792);893))                                                                                                                                                             | 500(new)                                                           | ENST00000398291.intron.7   | ENST00000398291.exon.8 | 50.83      | 50982      | 50623    | 117    | 476      | 1.00E-37  | 152     |           |
|                                                                                                                                                                                                    |                                                                                                                                                                                                      |                                                                                                                                                                                                      |                                                                    | ENST00000398291.intron.7   | ENST00000398291.exon.1 | 42.66      | 1436       | 1864     | 45     | 473      | 1.00E-33  | 139     |           |
|                                                                                                                                                                                                    |                                                                                                                                                                                                      |                                                                                                                                                                                                      |                                                                    | ENST00000398291.intron.7   | ENST00000398291.exon.1 | 41.27      | 61068      | 61256    | 70     | 258      | 8.00E-21  | 82.9    |           |
|                                                                                                                                                                                                    |                                                                                                                                                                                                      |                                                                                                                                                                                                      |                                                                    | ENST00000398291.intron.7   | ENST00000398291.exon.5 | 41.1       | 62738      | 62956    | 7      | 221      | 1.00E-11  | 54.8    |           |
|                                                                                                                                                                                                    |                                                                                                                                                                                                      |                                                                                                                                                                                                      |                                                                    |                            |                        |            |            |          |        |          |           |         |           |
| ENST00000396844(938*(1);953*(2))                                                                                                                                                                   | ENSMST00000098164(1)                                                                                                                                                                                 | ENSBTAG0000005100(12)                                                                                                                                                                                | 938(new);953(new)                                                  | ENST00000396844.intron.1   | ENST00000396844.exon.1 | 74.58      | 22759      | 22052    | 166    | 873      | 2.00E-145 | 441     |           |
|                                                                                                                                                                                                    |                                                                                                                                                                                                      |                                                                                                                                                                                                      |                                                                    | ENST00000396844.intron.1   | ENST00000396844.exon.1 | 62.9       | 22921      | 22778    | 1      | 144      | 2.00E-145 | 236     |           |
|                                                                                                                                                                                                    |                                                                                                                                                                                                      |                                                                                                                                                                                                      |                                                                    | ENST00000396844.intron.1   | ENST00000396844.exon.1 | 38.41      | 12386      | 11973    | 166    | 878      | 2.00E-40  | 127     |           |
|                                                                                                                                                                                                    |                                                                                                                                                                                                      |                                                                                                                                                                                                      |                                                                    | ENST00000396844.intron.1   | ENST00000396844.exon.1 | 87.5       | 13777      | 13262    | 183    | 878      | 2.00E-40  | 91.8    |           |
|                                                                                                                                                                                                    |                                                                                                                                                                                                      |                                                                                                                                                                                                      |                                                                    | ENST00000396844.intron.1   | ENST00000396844.exon.1 | 48         | 11800      | 11826    | 652    | 726      | 2.00E-40  | 91.8    |           |
|                                                                                                                                                                                                    |                                                                                                                                                                                                      |                                                                                                                                                                                                      |                                                                    |                            |                        |            |            |          |        |          |           |         |           |
| ENST00000400435(218*(1))                                                                                                                                                                           | ENSBTAG0000046261(36(6);98(205);291(388))                                                                                                                                                            | ENSMST00000039527(36(6);98(205);291(388))                                                                                                                                                            | 218(new)                                                           | ENST00000400435.intron.1   | ENST00000400435.exon.1 | 100        | 49         | 81       | 185    | 217      | 7.00E-16  | 65.9    |           |
|                                                                                                                                                                                                    |                                                                                                                                                                                                      |                                                                                                                                                                                                      |                                                                    |                            |                        |            |            |          |        |          |           |         |           |
| ENST00000304751(97(169);250(352);382*(5);486*(8);832)                                                                                                                                              | ENSBTAG00000037485(97(169);250(352);486(782);93(2))                                                                                                                                                  | ENSMST00000064635(97(169);250(352);486(782);93(2))                                                                                                                                                   | 382(new);832(new)                                                  | ENST00000304751.intron.6   | ENST00000304751.exon.6 | 93.75      | 30         | 77       | 54     | 101      | 5.00E-16  | 71.9    |           |
|                                                                                                                                                                                                    |                                                                                                                                                                                                      |                                                                                                                                                                                                      |                                                                    |                            |                        |            |            |          |        |          |           |         |           |
| ENST00000300544(481(593*(3));644(808(931);956(1))                                                                                                                                                  | ENSBTAG00000013174(481(597);808(848);938(969))                                                                                                                                                       | ENSMST00000022627(481(597);808(848);931(956))                                                                                                                                                        | 593(new);956(new)                                                  | ENST00000300544.exon.1     | ENST00000300544.exon.1 | 93.33      | 448        | 404      | 373    | 239      | 1.00E-15  | 86.1    |           |
|                                                                                                                                                                                                    |                                                                                                                                                                                                      |                                                                                                                                                                                                      |                                                                    |                            |                        |            |            |          |        |          |           |         |           |
| ENST00000266524(66(271);431(505);674(719);804(1124);1276(1538(11));1373(1867);2038(2186);2289(2518);2648(2770);2828(2912);3089(3173);3334(3415);3596(3820);4042(4170);4261(4330);4433(4633);4676)) | ENSMST00000060574(67(271);431(484);505(674(719);804(1124);1276(1538);1373(1867);2038(2186);2289(2518);2648(2770);2828(2912);3089(3173);3334(3415);3596(3820);4042(4170);4261(4330);4433(4633);4676)) | ENSBTAG0000024146(67(271);431(484);505(674(719);804(1124);1276(1538);1373(1867);2038(2186);2289(2518);2648(2770);2828(2912);3089(3173);3334(3415);3596(3820);4042(4170);4261(4330);4433(4633);4676)) | 1518(new)                                                          | ENST00000266524.intron.3   | ENST00000266524.exon.5 | 61.79      | 5478       | 5645     | 1      | 168      | 5.00E-132 | 66.1    |           |
|                                                                                                                                                                                                    |                                                                                                                                                                                                      |                                                                                                                                                                                                      |                                                                    | ENST00000266524.intron.4   | ENST00000266524.exon.1 | 47.76      | 914        | 1134     | 1      | 201      | 1.00E-15  | 78      |           |
|                                                                                                                                                                                                    |                                                                                                                                                                                                      |                                                                                                                                                                                                      |                                                                    | ENST00000266524.intron.4   | ENST00000266524.exon.1 | 42.11      | 7197       | 7367     | 1      | 171      | 9.00E-11  | 63.4    |           |
|                                                                                                                                                                                                    |                                                                                                                                                                                                      |                                                                                                                                                                                                      |                                                                    | ENST00000266524.intron.4   | ENST00000266524.exon.1 | 42         | 5833       | 5981     | 41     | 190      | 1.00E-08  | 54.7    |           |
|                                                                                                                                                                                                    |                                                                                                                                                                                                      |                                                                                                                                                                                                      |                                                                    | ENST00000266524.intron.4   | ENST00000266524.exon.1 | 50         | 6311       | 6480     | 1      | 150      | 9.00E-08  | 51.9    |           |
|                                                                                                                                                                                                    |                                                                                                                                                                                                      |                                                                                                                                                                                                      |                                                                    |                            |                        |            |            |          |        |          |           |         |           |
| ENST00000370468(175(244);323(402);469(618);1708*(7))                                                                                                                                               | ENSMST00000089845(175(244);323(402);469(618);1708(1708))                                                                                                                                             | ENSBTAG00000020676(175(244);323(402);469(618))                                                                                                                                                       | 1708(new);1708(new)                                                | ENST00000370468.exon.7     | ENST00000370468.exon.7 | 56.25      | 395        | 442      | 316    | 363      | 2.00E-27  | 56.1    |           |
|                                                                                                                                                                                                    |                                                                                                                                                                                                      |                                                                                                                                                                                                      |                                                                    |                            |                        |            |            |          |        |          |           |         |           |
| ENST00000190447(227(1703);1905*(3))                                                                                                                                                                | ENSMST0000007239(227(1703))                                                                                                                                                                          | ENSBTAG00000037812(1703)                                                                                                                                                                             | 1905(new);227(new)                                                 | ENST00000190447.exon.2     | ENST00000190447.exon.2 | 88.71      | 1064       | 1156     | 305    | 397      | 8.00E-36  | 68      |           |
|                                                                                                                                                                                                    |                                                                                                                                                                                                      |                                                                                                                                                                                                      |                                                                    |                            |                        |            |            |          |        |          |           |         |           |
| ENST00000378061(81(22(168);494*(3))                                                                                                                                                                | ENSBTAG0000001430(81(168);254(372);437(815);720(512075);3101))                                                                                                                                       | ENSMST00000005740(81(164))                                                                                                                                                                           | 494(new);81(new)                                                   | ENST00000378061.exon.4     | ENST00000378061.exon.4 | 58.04      | 1106       | 1004     | 1462   | 1340     | 1.00E-164 | 56.1    |           |
|                                                                                                                                                                                                    |                                                                                                                                                                                                      |                                                                                                                                                                                                      |                                                                    |                            |                        |            |            |          |        |          |           |         |           |
| ENST00000393221(456*(1);1311*(2))                                                                                                                                                                  | ENSBTAG00000004817(1)                                                                                                                                                                                | ENSMST00000006044(1)                                                                                                                                                                                 | 1311(new);456(new);1311(new)                                       | ENST00000393221.exon.2     | ENST00000393221.exon.1 | 92.59      | 340        | 393      | 2      | 55       | 1.00E-17  | 75.8    |           |
|                                                                                                                                                                                                    |                                                                                                                                                                                                      |                                                                                                                                                                                                      |                                                                    |                            |                        |            |            |          |        |          |           |         |           |
| ENST00000299921(68(107);925(6))                                                                                                                                                                    | ENSBTAG00000028661(68(107))                                                                                                                                                                          | ENSMST00000039827(68(107))                                                                                                                                                                           | 723(new)                                                           | ENST00000299921.intron.4   | ENST00000299921.exon.5 | 100        | 466        | 507      | 3      | 44       | 5.00E-06  | 39.1    |           |

|                                                                                                                                                                                                                                                                                                                                                               |                                                                                                                                                                                                                                                                                                                                                          |                                                                                                                                                                                                                                                                                                                                                          |                                                                                         |                           |                            |       |      |      |      |      |          |      |
|---------------------------------------------------------------------------------------------------------------------------------------------------------------------------------------------------------------------------------------------------------------------------------------------------------------------------------------------------------------|----------------------------------------------------------------------------------------------------------------------------------------------------------------------------------------------------------------------------------------------------------------------------------------------------------------------------------------------------------|----------------------------------------------------------------------------------------------------------------------------------------------------------------------------------------------------------------------------------------------------------------------------------------------------------------------------------------------------------|-----------------------------------------------------------------------------------------|---------------------------|----------------------------|-------|------|------|------|------|----------|------|
| ENST0000037590(811511213229336154461614<br>885851937107412551360155916681733<br>5205422142239229*(11)2331*(22)237024<br>091)                                                                                                                                                                                                                                  | ENST000000031468(811511213229336154461<br>61885851937107412551360155916681733<br>175911851804161918361863186119452054<br>225423322091)                                                                                                                                                                                                                   | ENST000000041251(8511307213229336154461<br>61885851937107412551360155916681861<br>19452054221422392293)                                                                                                                                                                                                                                                  | 2292(new:est:2331(new:est:                                                              | ENST0000037590.exon.20    | ENST0000037590.exon.2<br>1 | 93.1  | 11   | 39   | 11   | 39   | 1.00E-06 | 42.1 |
| ENST0000037759(1096*(11)2330*(21))                                                                                                                                                                                                                                                                                                                            | ENST000000039053(12811891)                                                                                                                                                                                                                                                                                                                               | ENST000000022971(1281897)                                                                                                                                                                                                                                                                                                                                | 1096(new:12330(new:est:                                                                 | ENST0000037759.exon.1     | ENST0000037759.exon.3      | 60.66 | 247  | 425  | 2    | 184  | 7.00E-25 | 96.4 |
|                                                                                                                                                                                                                                                                                                                                                               |                                                                                                                                                                                                                                                                                                                                                          |                                                                                                                                                                                                                                                                                                                                                          |                                                                                         | ENST0000037759.exon.1     | ENST0000037759.exon.3      | 57.89 | 178  | 345  | 14   | 184  | 4.00E-23 | 90.4 |
|                                                                                                                                                                                                                                                                                                                                                               |                                                                                                                                                                                                                                                                                                                                                          |                                                                                                                                                                                                                                                                                                                                                          |                                                                                         | ENST0000037759.exon.1     | ENST0000037759.exon.3      | 54.84 | 78   | 157  | 1    | 187  | 3.00E-22 | 84.9 |
|                                                                                                                                                                                                                                                                                                                                                               |                                                                                                                                                                                                                                                                                                                                                          |                                                                                                                                                                                                                                                                                                                                                          |                                                                                         | ENST0000037759.exon.1     | ENST0000037759.exon.3      | 55    | 1    | 180  | 6    | 187  | 2.00E-21 | 84.9 |
|                                                                                                                                                                                                                                                                                                                                                               |                                                                                                                                                                                                                                                                                                                                                          |                                                                                                                                                                                                                                                                                                                                                          |                                                                                         | ENST0000037759.exon.1     | ENST0000037759.exon.2      | 52.27 | 112  | 243  | 2    | 132  | 1.00E-13 | 59.3 |
|                                                                                                                                                                                                                                                                                                                                                               |                                                                                                                                                                                                                                                                                                                                                          |                                                                                                                                                                                                                                                                                                                                                          |                                                                                         | ENST0000037759.exon.1     | ENST0000037759.exon.2      | 45.45 | 28   | 112  | 1    | 112  | 2.00E-12 | 55.2 |
|                                                                                                                                                                                                                                                                                                                                                               |                                                                                                                                                                                                                                                                                                                                                          |                                                                                                                                                                                                                                                                                                                                                          |                                                                                         | ENST0000037759.exon.2     | ENST0000037759.exon.1      | 52.38 | 1    | 126  | 16   | 160  | 2.00E-13 | 56.1 |
|                                                                                                                                                                                                                                                                                                                                                               |                                                                                                                                                                                                                                                                                                                                                          |                                                                                                                                                                                                                                                                                                                                                          |                                                                                         | ENST0000037759.exon.1     | ENST0000037759.exon.1      | 64.29 | 446  | 405  | 362  | 321  | 2.00E-24 | 91.3 |
| ENST0000034006(51*(4)1177*(5)312*(6)14491<br>7871828211012170208624582743128022864<br>3026333213251)                                                                                                                                                                                                                                                          | ENST00000004268(1234491767182821108220<br>30127022862458274312802286430263332<br>1323253)                                                                                                                                                                                                                                                                | ENST00000008804(1234491767182821108220<br>30127022862458274312802286430263332<br>253)                                                                                                                                                                                                                                                                    | 177(new:est:312(new:est:51(new:est:                                                     | ENST0000034006.exon.3     | ENST0000040076.exon.3      | 31.15 | 4451 | 4269 | 104  | 286  | 9.00E-06 | 29.9 |
| ENST0000039928(1462453294936147191920*<br>171158023711880202921672075233924202<br>263127101)                                                                                                                                                                                                                                                                  | ENST000000048938(1462453294936147191920<br>151896118861330014802151615601371188020<br>1921617227523292432263127336)                                                                                                                                                                                                                                      | ENST000000014766(1462453294936147191920<br>1215602187416711388020392167207524322<br>6313017)                                                                                                                                                                                                                                                             | 920(dup:est:                                                                            | ENST0000039928.exon.8     | ENST0000039928.exon.8      | 46.15 | 91   | 129  | 43   | 81   | 9.00E-07 | 29.7 |
| ENST0000025838(148317587597671*(5)7557837<br>76274021132119311931142115111644)                                                                                                                                                                                                                                                                                | ENST000000020915(175877557837982111127<br>1189113431469114091)                                                                                                                                                                                                                                                                                           | ENST000000015924(14831758759767158379591<br>1121193115111644)                                                                                                                                                                                                                                                                                            | 671(new:est:                                                                            | ENST00000258382.exon.5    | ENST00000258382.exon.6     | 59.26 | 4    | 84   | 4    | 84   | 2.00E-06 | 38.8 |
|                                                                                                                                                                                                                                                                                                                                                               |                                                                                                                                                                                                                                                                                                                                                          |                                                                                                                                                                                                                                                                                                                                                          |                                                                                         | ENST00000258382.exon.9    | ENST00000258382.exon.1     | 65.96 | 145  | 5    | 145  | 5    | 3.00E-16 | 71.2 |
| ENST0000031028(8*(11)182437167414681690178<br>17872456259027651)                                                                                                                                                                                                                                                                                              | ENST00000002768(182437167414681690178<br>72456259027651)                                                                                                                                                                                                                                                                                                 | ENST00000001689(182437167414681690178<br>72456259027651)                                                                                                                                                                                                                                                                                                 | 3(new:1                                                                                 | ENST0000031028.exon.2     | ENST0000031028.exon.4      | 69.97 | 74   | 142  | 126  | 194  | 5.00E-07 | 38.6 |
| ENST0000031519(179*(1)292*(2)3595037602<br>9261136128011471165730403082)                                                                                                                                                                                                                                                                                      | ENST00000004402(99126359503760270792<br>611361128011471165730403082)                                                                                                                                                                                                                                                                                     | ENST000000088117(973595037602926113<br>611361128011471165730403082)                                                                                                                                                                                                                                                                                      | 179(new:est:292(new:est:                                                                | ENST0000031519.intron.4   | ENST0000031519.exon.2      | 90.32 | 164  | 256  | 2    | 94   | 2.00E-17 | 74.8 |
| ENST0000034149(77*(1)784*(2))                                                                                                                                                                                                                                                                                                                                 | ENST000000015816(8237051)                                                                                                                                                                                                                                                                                                                                | ENST00000005587(1)                                                                                                                                                                                                                                                                                                                                       | 777(new:784(new:                                                                        | ENST0000034149.intron.2   | ENST0000034149.intron.2    | 41.60 | 18   | 68   | 11   | 68   | 4.00E-27 | 41.6 |
|                                                                                                                                                                                                                                                                                                                                                               |                                                                                                                                                                                                                                                                                                                                                          |                                                                                                                                                                                                                                                                                                                                                          |                                                                                         | ENST0000034149.intron.2   | ENST0000034149.exon.1      | 89.76 | 338  | 269  | 25   | 776  | 0        | 82.0 |
| ENST0000038025(71*(1)27113254655566367<br>17188619791078118012841393148016521785138<br>5118931252293361544616147191920*17115802<br>3711880202921672075233924202263127101<br>47132013481359237471384140284036446334<br>470146224761484446951099157815977156991<br>58971582166147121688370247204173667441<br>176127813806516721844316931862187761888<br>178920) | ENST000000087204(271132546555663671718<br>8619791078118012841393148016521785138<br>931252293361544616147191920*17115802<br>3711880202921672075233924202263127101<br>32013481359237471384140284036446334<br>445146224761484446951099157815977156991<br>156991589715821661471216883702472041736<br>677441761278138065167218443169318621877<br>61886718920) | ENST000000035784(271132546555663671718<br>8619791078118012841393148016521785138<br>931252293361544616147191920*17115802<br>3711880202921672075233924202263127101<br>32013481359237471384140284036446334<br>445146224761484446951099157815977156991<br>156991589715821661471216883702472041736<br>677441761278138065167218443169318621877<br>61886718920) | 71(new:est:                                                                             | ENST00000380250.exon.1    | ENST00000380250.exon.1     | 61.54 | 358  | 396  | 373  | 311  | 2.00E-62 | 22.6 |
| ENST0000029118(73594239*(5))                                                                                                                                                                                                                                                                                                                                  | ENST00000005043(221710828427)                                                                                                                                                                                                                                                                                                                            | ENST00000001074(194732211)                                                                                                                                                                                                                                                                                                                               | 239(new:est:                                                                            | ENST00000291187.exon.6    | ENST00000291187.exon.8     | 76.92 | 1326 | 1403 | 1407 | 1484 | 0        | 147  |
| ENST00000376178(288781*(2)793*(3)8851)                                                                                                                                                                                                                                                                                                                        | ENST00000002073(28818851)                                                                                                                                                                                                                                                                                                                                | ENST000000037356(128818851)                                                                                                                                                                                                                                                                                                                              | 783(new:793(new:                                                                        | ENST00000376178.intron.2  | ENST00000376178.exon.4     | 95.83 | 82   | 105  | 69   | 92   | 1.00E-06 | 40.1 |
|                                                                                                                                                                                                                                                                                                                                                               |                                                                                                                                                                                                                                                                                                                                                          |                                                                                                                                                                                                                                                                                                                                                          |                                                                                         | ENST00000376178.intron.2  | ENST00000376178.exon.4     | 59.26 | 105  | 25   | 82   | 112  | 9.00E-08 | 40.9 |
| ENST00000306346(42127291*(4))                                                                                                                                                                                                                                                                                                                                 | ENST000000002428(424272)                                                                                                                                                                                                                                                                                                                                 | ENST000000066497(424272)                                                                                                                                                                                                                                                                                                                                 | 917(new:est:                                                                            | ENST00000306346.intron.4  | ENST00000306346.exon.4     | 53.85 | 3    | 80   | 264  | 241  | 2.00E-07 | 42.8 |
|                                                                                                                                                                                                                                                                                                                                                               |                                                                                                                                                                                                                                                                                                                                                          |                                                                                                                                                                                                                                                                                                                                                          |                                                                                         | ENST00000306346.intron.4  | ENST00000306346.exon.4     | 53.13 | 1    | 22   | 280  | 267  | 6.00E-07 | 40.2 |
| ENST00000290863(2003374965847289201038<br>119114151560165917821970207*(14)215<br>61)                                                                                                                                                                                                                                                                          | ENST000000001964(2003374965847289201038<br>018119114151560165917821970207)                                                                                                                                                                                                                                                                               | ENST00000005428(3374965847289201038<br>119114151560165917821970207)                                                                                                                                                                                                                                                                                      | 2027(new:est:                                                                           | ENST00000290863.exon.6    | ENST00000290863.exon.1     | 87.5  | 49   | 192  | 49   | 192  | 5.00E-37 | 143  |
|                                                                                                                                                                                                                                                                                                                                                               |                                                                                                                                                                                                                                                                                                                                                          |                                                                                                                                                                                                                                                                                                                                                          |                                                                                         | ENST00000290863.exon.12   | ENST00000290863.exon.2     | 84.34 | 21   | 103  | 21   | 103  | 9.00E-13 | 81.9 |
|                                                                                                                                                                                                                                                                                                                                                               |                                                                                                                                                                                                                                                                                                                                                          |                                                                                                                                                                                                                                                                                                                                                          |                                                                                         | ENST00000290863.exon.5    | ENST00000290863.exon.1     | 61.36 | 12   | 143  | 9    | 140  | 8.00E-16 | 69.3 |
|                                                                                                                                                                                                                                                                                                                                                               |                                                                                                                                                                                                                                                                                                                                                          |                                                                                                                                                                                                                                                                                                                                                          |                                                                                         | ENST00000290863.exon.6    | ENST00000290863.exon.1     | 74.6  | 3    | 193  | 3    | 193  | 2.00E-30 | 118  |
|                                                                                                                                                                                                                                                                                                                                                               |                                                                                                                                                                                                                                                                                                                                                          |                                                                                                                                                                                                                                                                                                                                                          |                                                                                         | ENST00000290863.exon.8    | ENST00000290863.exon.2     | 62.5  | 4    | 171  | 4    | 171  | 4.00E-24 | 97.3 |
|                                                                                                                                                                                                                                                                                                                                                               |                                                                                                                                                                                                                                                                                                                                                          |                                                                                                                                                                                                                                                                                                                                                          |                                                                                         | ENST00000290863.exon.9    | ENST00000290863.exon.2     | 55.1  | 59   | 205  | 58   | 204  | 2.00E-19 | 68.8 |
|                                                                                                                                                                                                                                                                                                                                                               |                                                                                                                                                                                                                                                                                                                                                          |                                                                                                                                                                                                                                                                                                                                                          |                                                                                         | ENST00000290863.exon.9    | ENST00000290863.exon.2     | 52.38 | 2    | 64   | 2    | 64   | 2.00E-19 | 46.9 |
|                                                                                                                                                                                                                                                                                                                                                               |                                                                                                                                                                                                                                                                                                                                                          |                                                                                                                                                                                                                                                                                                                                                          |                                                                                         | ENST00000290863.exon.10   | ENST00000290863.exon.2     | 67.39 | 6    | 143  | 6    | 143  | 4.00E-21 | 86.6 |
|                                                                                                                                                                                                                                                                                                                                                               |                                                                                                                                                                                                                                                                                                                                                          |                                                                                                                                                                                                                                                                                                                                                          |                                                                                         | ENST00000290863.exon.11   | ENST00000290863.exon.2     | 75    | 2    | 73   | 2    | 73   | 2.00E-11 | 55.8 |
|                                                                                                                                                                                                                                                                                                                                                               |                                                                                                                                                                                                                                                                                                                                                          |                                                                                                                                                                                                                                                                                                                                                          |                                                                                         | ENST00000290863.exon.13   | ENST00000290863.exon.2     | 48.94 | 5    | 145  | 5    | 145  | 4.00E-15 | 67.9 |
|                                                                                                                                                                                                                                                                                                                                                               |                                                                                                                                                                                                                                                                                                                                                          |                                                                                                                                                                                                                                                                                                                                                          |                                                                                         | ENST00000290863.intron.24 | ENST00000290863.exon.2     | 89.09 | 13   | 67   | 42   | 95   | 5.00E-09 | 94   |
| ENST0000037398(1191452413384034961975<br>2184*(8))                                                                                                                                                                                                                                                                                                            | ENST000000002677(1191452413384034961975<br>75190716721)                                                                                                                                                                                                                                                                                                  | ENST00000008476(1191452413384034961975<br>751)                                                                                                                                                                                                                                                                                                           | 2184(new:est:                                                                           | ENST0000037398.exon.8     | ENST0000037398.exon.8      | 53.97 | 1197 | 1220 | 699  | 762  | 2.00E-06 | 41.1 |
| ENST0000033702(128*(1)7808*(2)7604*(3)835*(4)<br>1188*(5)189*(6)798*(7)14861192181318<br>16633312641)                                                                                                                                                                                                                                                         | ENST000000007366(14861192181318361937<br>1964)                                                                                                                                                                                                                                                                                                           | ENST00000002555(14861192181318361937<br>1964)                                                                                                                                                                                                                                                                                                            | 508(dup:est:7604(dup:est:783(dup:est<br>786(dup:est:18(new:est:959(new:est<br>2961(new: | ENST0000033702.exon.2     | ENST0000033702.exon.8      | 92.39 | 365  | 456  | 375  | 466  | 1.00E-31 | 127  |
|                                                                                                                                                                                                                                                                                                                                                               |                                                                                                                                                                                                                                                                                                                                                          |                                                                                                                                                                                                                                                                                                                                                          |                                                                                         | ENST0000033702.exon.2     | ENST0000033702.exon.8      | 88.37 | 103  | 186  | 111  | 198  | 6.00E-21 | 91.7 |
|                                                                                                                                                                                                                                                                                                                                                               |                                                                                                                                                                                                                                                                                                                                                          |                                                                                                                                                                                                                                                                                                                                                          |                                                                                         | ENST0000033702.exon.1     | ENST0000033702.exon.8      | 82.87 | 23   | 86   | 23   | 86   | 2.00E-08 | 66.2 |
|                                                                                                                                                                                                                                                                                                                                                               |                                                                                                                                                                                                                                                                                                                                                          |                                                                                                                                                                                                                                                                                                                                                          |                                                                                         | ENST0000033702.exon.4     | ENST0000033702.exon.1      | 84    | 132  | 231  | 132  | 231  | 5.00E-15 | 71.9 |
|                                                                                                                                                                                                                                                                                                                                                               |                                                                                                                                                                                                                                                                                                                                                          |                                                                                                                                                                                                                                                                                                                                                          |                                                                                         | ENST0000033702.exon.4     | ENST0000033702.exon.1      | 0     | 0    | 0    | 0    | 0    | 0        | 0    |
|                                                                                                                                                                                                                                                                                                                                                               |                                                                                                                                                                                                                                                                                                                                                          |                                                                                                                                                                                                                                                                                                                                                          |                                                                                         | ENST0000033702.exon.2     | ENST0000033702.exon.8      | 63.64 | 62   | 490  | 72   | 500  | 4.00E-63 | 129  |
|                                                                                                                                                                                                                                                                                                                                                               |                                                                                                                                                                                                                                                                                                                                                          |                                                                                                                                                                                                                                                                                                                                                          |                                                                                         | ENST0000033702.exon.4     | ENST0000033702.exon.1      | 53.95 | 2    | 229  | 2    | 229  | 2.00E-20 | 86.3 |
|                                                                                                                                                                                                                                                                                                                                                               |                                                                                                                                                                                                                                                                                                                                                          |                                                                                                                                                                                                                                                                                                                                                          |                                                                                         | ENST0000033702.exon.6     | ENST0000033702.exon.1      | 61.52 | 2    | 100  | 2    | 100  | 4.00E-09 | 46.4 |
|                                                                                                                                                                                                                                                                                                                                                               |                                                                                                                                                                                                                                                                                                                                                          |                                                                                                                                                                                                                                                                                                                                                          |                                                                                         | ENST0000033702.intron.5   | ENST0000033702.exon.1      | 89.55 | 362  | 438  | 193  | 195  | 4.00E-15 | 77.8 |
|                                                                                                                                                                                                                                                                                                                                                               |                                                                                                                                                                                                                                                                                                                                                          |                                                                                                                                                                                                                                                                                                                                                          |                                                                                         | ENST0000033702.intron.7   | ENST0000033702.exon.1      | 63.64 | 218  | 283  | 3    | 88   | 4.00E-54 | 89   |
| ENST0000037641(281351511868*(5))                                                                                                                                                                                                                                                                                                                              | ENST000000003940(155251)                                                                                                                                                                                                                                                                                                                                 | ENST000000003797(281155251)                                                                                                                                                                                                                                                                                                                              | 1868(new:est:                                                                           | ENST0000037641.exon.5     | ENST0000037641.exon.6      | 88.06 | 931  | 664  | 50   | 223  | 4.00E-15 | 139  |
|                                                                                                                                                                                                                                                                                                                                                               |                                                                                                                                                                                                                                                                                                                                                          |                                                                                                                                                                                                                                                                                                                                                          |                                                                                         | ENST0000037641.exon.5     | ENST0000037641.exon.6      | 55.17 | 448  | 534  | 4    | 90   | 1.00E-38 | 112  |
|                                                                                                                                                                                                                                                                                                                                                               |                                                                                                                                                                                                                                                                                                                                                          |                                                                                                                                                                                                                                                                                                                                                          |                                                                                         | ENST0000037641.intron.5   | ENST0000037641.exon.6      | 41.18 | 143  | 93   | 67   | 75   | 3.00E-23 | 60.9 |
|                                                                                                                                                                                                                                                                                                                                                               |                                                                                                                                                                                                                                                                                                                                                          |                                                                                                                                                                                                                                                                                                                                                          |                                                                                         | ENST0000037641.intron.5   | ENST0000037641.exon.6      | 80    | 67   | 292  | 1166 | 1156 | 1.00E-28 | 116  |
|                                                                                                                                                                                                                                                                                                                                                               |                                                                                                                                                                                                                                                                                                                                                          |                                                                                                                                                                                                                                                                                                                                                          |                                                                                         | ENST0000037641.intron.5   | ENST0000037641.exon.6      | 96.97 | 259  | 291  | 703  | 735  | 2.00E-11 | 58   |
|                                                                                                                                                                                                                                                                                                                                                               |                                                                                                                                                                                                                                                                                                                                                          |                                                                                                                                                                                                                                                                                                                                                          |                                                                                         | ENST0000037641.intron.5   | ENST0000037641.exon.6      | 46.44 | 218  | 316  | 679  | 528  | 4.00E-16 | 54   |
|                                                                                                                                                                                                                                                                                                                                                               |                                                                                                                                                                                                                                                                                                                                                          |                                                                                                                                                                                                                                                                                                                                                          |                                                                                         | ENST0000037641.intron.5   | ENST0000037641.exon.6      | 93.75 | 150  | 181  | 510  | 941  | 2.00E-08 | 48.1 |
|                                                                                                                                                                                                                                                                                                                                                               |                                                                                                                                                                                                                                                                                                                                                          |                                                                                                                                                                                                                                                                                                                                                          |                                                                                         | ENST0000037641.intron.5   | ENST0000037641.exon.6      | 59.46 | 3    | 335  | 447  | 775  | 8.00E-47 | 173  |
|                                                                                                                                                                                                                                                                                                                                                               |                                                                                                                                                                                                                                                                                                                                                          |                                                                                                                                                                                                                                                                                                                                                          |                                                                                         | ENST0000037641.intron.5   | ENST0000037641.exon.6      | 49.55 | 3    | 335  | 693  | 951  | 1.00E-19 | 149  |
|                                                                                                                                                                                                                                                                                                                                                               |                                                                                                                                                                                                                                                                                                                                                          |                                                                                                                                                                                                                                                                                                                                                          |                                                                                         | ENST0000037641.intron.5   | ENST0000037641.exon.6      | 47.22 | 12   | 335  | 288  | 611  | 3.00E-37 | 141  |
|                                                                                                                                                                                                                                                                                                                                                               |                                                                                                                                                                                                                                                                                                                                                          |                                                                                                                                                                                                                                                                                                                                                          |                                                                                         | ENST0000037641.intron.5   | ENST0000037641.exon.6      | 44.79 | 132  | 512  | 51   | 251  | 3.00E-24 | 78.5 |
|                                                                                                                                                                                                                                                                                                                                                               |                                                                                                                                                                                                                                                                                                                                                          |                                                                                                                                                                                                                                                                                                                                                          |                                                                                         | ENST0000037641.intron.5   | ENST0000037641.exon.6      | 56.17 | 74   | 74   | 74   | 74   | 3.00E-24 | 77.6 |
|                                                                                                                                                                                                                                                                                                                                                               |                                                                                                                                                                                                                                                                                                                                                          |                                                                                                                                                                                                                                                                                                                                                          |                                                                                         | ENST0000037641.exon.5     | ENST0000037641.exon.6      | 58.25 | 1366 | 1371 | 1114 | 1059 | 1.00E-72 | 159  |
|                                                                                                                                                                                                                                                                                                                                                               |                                                                                                                                                                                                                                                                                                                                                          |                                                                                                                                                                                                                                                                                                                                                          |                                                                                         | ENST0000037641.exon.6     | ENST0000037641.exon.6      | 54.85 | 90   | 155  | 2    | 68   | 8.00E-13 | 92.6 |

|                                                                                                                                                                                                   |                                                                                                                                                                                              |                                                                                                                                                                                               |                                                                              |                           |                         |       |         |         |      |      |           |      |
|---------------------------------------------------------------------------------------------------------------------------------------------------------------------------------------------------|----------------------------------------------------------------------------------------------------------------------------------------------------------------------------------------------|-----------------------------------------------------------------------------------------------------------------------------------------------------------------------------------------------|------------------------------------------------------------------------------|---------------------------|-------------------------|-------|---------|---------|------|------|-----------|------|
| ENST00000395193 263*(11 301*(2))                                                                                                                                                                  | ENST000000050442(1)                                                                                                                                                                          | ENSMUST0000099898(1)                                                                                                                                                                          | 263(new rest)                                                                | ENST00000395193.Intron.1  | ENST00000395193.exon.2  | 60.17 | 3       | 355     | 3    | 355  | 3.00E-74  | 243  |
|                                                                                                                                                                                                   |                                                                                                                                                                                              |                                                                                                                                                                                               |                                                                              | ENST00000395193.Intron.2  | ENST00000395193.exon.1  | 64.37 | 28709   | 28969   | 1    | 261  | 1.00E-33  | 137  |
|                                                                                                                                                                                                   |                                                                                                                                                                                              |                                                                                                                                                                                               |                                                                              | ENST00000395193.Intron.3  | ENST00000395193.exon.1  | 55.87 | 12405   | 12148   | 1    | 55   | 1.00E-35  | 110  |
| ENST0000034591(495*(1))                                                                                                                                                                           | ENST000000025024(4 82 261 161 516 494)                                                                                                                                                       | ENSMUST000003363(4 82 261 161 516 494)                                                                                                                                                        | 439(new rest)                                                                | ENST0000034591.Intron.1   | ENST0000034591.exon.1   | 87.17 | 63408   | 63823   | 20   | 439  | 4.00E-108 | 388  |
|                                                                                                                                                                                                   |                                                                                                                                                                                              |                                                                                                                                                                                               |                                                                              | ENST0000034591.Intron.2   | ENST0000034591.exon.2   | 85.14 | 19      | 255     | 25   | 273  | 1.00E-55  | 214  |
| ENST000000049001(11 7 877 237 380 481 804 9<br>43 1007 1217 1498 1951 2048 2096 2310 2403 2<br>472 2650 2755 2800 3079 3384*(12) 3501*(23) <br>3935*(24) 3865*(25) 3838*(26))                     | ENST000000011338(10 11 7 877 237 380 481 804 9<br>6 643 862 1007 1217 1498 1951 2048 2096 2310 240<br>3 2472 2650 2755 2800)                                                                 | ENSMUST0000097624(10 11 7 877 237 380 481 804 9<br>6 643 1007 1217 1498 1951 2048 2096 2310 240<br>3 2472 2650 2755 2800)                                                                     | 3501(dup rest);351(dup rest);360(dup <br>rest);3343(new rest);3938(new rest) | ENST00000254900.exon.18   | ENST00000254900.exon.2  | 83.16 | 80      | 174     | 80   | 174  | 1.00E-12  | 61.9 |
|                                                                                                                                                                                                   |                                                                                                                                                                                              |                                                                                                                                                                                               |                                                                              | ENST00000254900.exon.15   | ENST00000254900.exon.2  | 52.78 | 55      | 162     | 13   | 120  | 2.00E-08  | 45.8 |
|                                                                                                                                                                                                   |                                                                                                                                                                                              |                                                                                                                                                                                               |                                                                              | ENST00000254900.exon.18   | ENST00000254900.exon.2  | 69.49 | 2       | 178     | 2    | 178  | 1.00E-26  | 105  |
| ENST000000042658(59 139*(2) 331 451 587 788*9<br>14 1020 1389 1396)                                                                                                                               | ENST000000003397(59 223 331 451 587 788*9<br>2 954 1020 1386 1323 1468 1355)                                                                                                                 | ENSMUST00000056106(59 223 331 451 587 788*9<br>4 1020 1386 1323 1468 1355)                                                                                                                    | 139(new rest)                                                                | ENST00000042658.exon.1    | ENST00000042658.exon.1  | 76.92 | 214     | 176     | 94   | 56   | 9.00E-36  | 24.9 |
| ENST000000294905(148 192 1348 1964 2258 2319 <br>2428 2510*(13) 2741 2834 2896 2962 3028 3079<br> 3139 3280 3358 3750 3850 4069 4132 4277 4493<br>9 5216 5372 5533 5739 5980 6127 6393 6537* )    | ENST000000004602(1897 146 1364 554 748 952 1<br>348 1364 2258 2319 2428 2741 2834 2896 2962 <br>3028 3079 3139 3280 3358 3750 3850 4069 4132<br> 4277* )                                     | ENSMUST00000112553(146 197 386 554 748 952 1<br>348 1364 2258 2319 2428 2741 2834 2896 2962 <br>3028 3079 3139 3280 3358 3750 3850 4069 4132<br> 4277* )                                      | 2530(new rest)                                                               | ENST00000294905.exon.14   | ENST00000294905.exon.1  | 70    | 55      | 84      | 118  | 147  | 5.00E-24  | 84   |
| ENST000000039287(31 138 494*(3))                                                                                                                                                                  | ENST00000001430(31 138 494 372 437 812 13<br>02 2072 3098)                                                                                                                                   | ENSMUST0000005740(11 144)                                                                                                                                                                     | 494(new rest)                                                                | ENST0000039287.exon.4     | ENST0000039287.exon.4   | 58.34 | 1126    | 1054    | 1452 | 1340 | 8.00E-165 | 361  |
| ENST00000003598(31 25 190 235 324 391 479 612*7<br>79 877 932*(10) 1033)                                                                                                                          | ENST000000007611(25 190 235 324 391 479 612*7<br>9 779 877 1033)                                                                                                                             | ENSMUST00000012608(25 190 235 324 391 479 612*7<br>9 779 877 1033)                                                                                                                            | 912(new rest)                                                                | ENST0000003598.Intron.11  | ENST00000035981.exon.1  | 90.62 | 4943    | 5038    | 358  | 263  | 1.00E-17  | 72.5 |
| ENST000000014584(56*(11 139 386 478 730 824*7<br>12 1000 1147 1393 1891 2009 2070)                                                                                                                | ENST000000016308(476*7 10 824 912 1000 1147<br> 1793 1891 2009 2070)                                                                                                                         | ENSMUST0000009056(139 133 284 478 730 824*9<br>12 1000 1147 1393 1891 2009 2070)                                                                                                              | 55(new rest)                                                                 | ENST00000014584.Intron.2  | ENST00000014584.exon.2  | 59.26 | 43369   | 43479   | 3    | 83   | 2.00E-06  | 61   |
| ENST000000018168(41 131 192 1439*(4))                                                                                                                                                             | ENST000000002297(131 192)                                                                                                                                                                    | ENSMUST0000014419(4 131 192)                                                                                                                                                                  | 1439(new rest)                                                               | ENST00000018168.exon.4    | ENST00000018168.exon.6  | 59.26 | 290     | 370     | 610  | 690  | 4.00E-11  | 44.1 |
|                                                                                                                                                                                                   |                                                                                                                                                                                              |                                                                                                                                                                                               |                                                                              | ENST00000018168.exon.4    | ENST00000018168.exon.6  | 59    | 245     | 311     | 104  | 278  | 4.00E-11  | 34.5 |
|                                                                                                                                                                                                   |                                                                                                                                                                                              |                                                                                                                                                                                               |                                                                              | ENST00000018168.exon.4    | ENST00000018168.exon.6  | 49    | 319     | 209     | 190  | 51   | 4.00E-09  | 34.5 |
|                                                                                                                                                                                                   |                                                                                                                                                                                              |                                                                                                                                                                                               |                                                                              | ENST00000018168.exon.6    | ENST00000018168.exon.6  | 44.83 | 604     | 690     | 229  | 91   | 7.00E-07  | 32.7 |
| ENST000000039878(280 445 637 800*(4))                                                                                                                                                             | ENSMUST0000010051(59 146 280 445 637)                                                                                                                                                        | ENST000000049139(146 280 445 637 763)                                                                                                                                                         | 800(new rest)                                                                | ENST00000039878.exon.3    | ENST00000039878.exon.4  | 44.83 | 97      | 183     | 0    | 90   | 7.00E-06  | 32   |
| ENST0000001379(21 418 134*(13))                                                                                                                                                                   | ENSMUST0000005448(21 418)                                                                                                                                                                    | ENST0000000208(2 869)                                                                                                                                                                         | 1344(new rest)                                                               | ENST0000001379.exon.1     | ENST00000013791.exon.1  | 63.64 | 398     | 430     | 437  | 469  | 8.00E-13  | 28.7 |
|                                                                                                                                                                                                   |                                                                                                                                                                                              |                                                                                                                                                                                               |                                                                              | ENST0000001379.exon.3     | ENST00000013791.exon.3  | 55.63 | 620     | 545     | 613  | 358  | 1.00E-87  | 314  |
| ENST00000007934(187 933 1135 1221 1368 1538 <br>1777*(14) 2958 3127 3325 3441)                                                                                                                    | ENST000000009917(220 248 274 285 310 349 3<br>73 474 549 641 725 797 933 1135 1221 1368 15<br>38 2958 3127 3325 3441)                                                                        | ENSMUST0000004855(193 230 373 370 474 549 64<br>1 725 797 933 1135 1221 1368 1538 2958 3127 <br>3325 3441)                                                                                    | 1777(new rest)                                                               | ENST0000007934.Intron.13  | ENST0000007934.exon.1   | 96.55 | 2603    | 2611    | 192  | 190  | 6.00E-07  | 50.1 |
| ENST0000000508(11 10 117 395 548 663*(5) 774*(<br>7) 885*(8) 986*(9) 1110(1199))                                                                                                                  | ENST000000017694(110 217 395 548 753 1110 <br>1199)                                                                                                                                          | ENSMUST0000014726(110 217 395 548 753 1110 <br>1199)                                                                                                                                          | 651(dup rest);774(dup rest);885(dup rest;<br>);986(dup rest)                 | ENST00000050831.exon.7    | ENST00000050831.exon.1  | 86.11 | 110     | 3       | 110  | 3    | 1.00E-19  | 77.6 |
|                                                                                                                                                                                                   |                                                                                                                                                                                              |                                                                                                                                                                                               |                                                                              | ENST00000050831.exon.7    | ENST00000050831.exon.8  | 77.78 | 2       | 109     | 2    | 109  | 6.00E-17  | 71   |
|                                                                                                                                                                                                   |                                                                                                                                                                                              |                                                                                                                                                                                               |                                                                              | ENST00000050831.exon.7    | ENST00000050831.exon.9  | 69.7  | 101     | 3       | 101  | 3    | 3.00E-13  | 57.4 |
|                                                                                                                                                                                                   |                                                                                                                                                                                              |                                                                                                                                                                                               |                                                                              | ENST00000050831.exon.8    | ENST00000050831.exon.9  | 90.91 | 2       | 100     | 2    | 100  | 2.00E-19  | 79.4 |
|                                                                                                                                                                                                   |                                                                                                                                                                                              |                                                                                                                                                                                               |                                                                              | ENST00000050831.exon.8    | ENST00000050831.exon.1  | 77.78 | 2       | 109     | 2    | 109  | 1.00E-16  | 70.3 |
|                                                                                                                                                                                                   |                                                                                                                                                                                              |                                                                                                                                                                                               |                                                                              | ENST00000050831.exon.9    | ENST00000050831.exon.1  | 66.67 | 2       | 100     | 2    | 100  | 4.00E-12  | 55.2 |
|                                                                                                                                                                                                   |                                                                                                                                                                                              |                                                                                                                                                                                               |                                                                              | ENST00000050831.Intron.9  | ENST00000050831.exon.1  | 83.33 | 435     | 542     | 2    | 109  | 4.00E-17  | 75.8 |
|                                                                                                                                                                                                   |                                                                                                                                                                                              |                                                                                                                                                                                               |                                                                              | ENST00000050831.Intron.9  | ENST00000050831.exon.2  | 80.56 | 435     | 542     | 2    | 109  | 7.00E-17  | 74.8 |
|                                                                                                                                                                                                   |                                                                                                                                                                                              |                                                                                                                                                                                               |                                                                              | ENST00000050831.Intron.9  | ENST00000050831.exon.2  | 83.33 | 435     | 542     | 2    | 109  | 1.00E-16  | 74.6 |
|                                                                                                                                                                                                   |                                                                                                                                                                                              |                                                                                                                                                                                               |                                                                              | ENST00000050831.Intron.9  | ENST00000050831.exon.9  | 72.73 | 435     | 533     | 2    | 100  | 3.00E-12  | 59.2 |
| ENST000000040291(1 27 376 1097 1327*(4))                                                                                                                                                          | ENST000000002463(4 227 376 1097)                                                                                                                                                             | ENSMUST0000003233(4 227 376 1097)                                                                                                                                                             | 1327(new rest)                                                               | ENST00000040291.Intron.4  | ENST000000402917.exon.3 | 79.39 | 2699294 | 269984  | 5    | 876  | 6.00E-40  | 276  |
|                                                                                                                                                                                                   |                                                                                                                                                                                              |                                                                                                                                                                                               |                                                                              | ENST000000402917.Intron.4 | ENST000000402917.exon.4 | 89.23 | 2693458 | 2693358 | 130  | 1    | 6.00E-31  | 147  |
|                                                                                                                                                                                                   |                                                                                                                                                                                              |                                                                                                                                                                                               |                                                                              | ENST000000402917.Intron.4 | ENST000000402917.exon.2 | 87.5  | 2757933 | 275743  | 13   | 76   | 6.00E-06  | 83.9 |
|                                                                                                                                                                                                   |                                                                                                                                                                                              |                                                                                                                                                                                               |                                                                              | ENST000000402917.Intron.4 | ENST000000402917.exon.3 | 80    | 2699548 | 2699138 | 122  | 681  | 8.00E-97  | 232  |
|                                                                                                                                                                                                   |                                                                                                                                                                                              |                                                                                                                                                                                               |                                                                              | ENST000000402917.Intron.4 | ENST000000402917.exon.4 | 86.67 | 2683457 | 2683336 | 8    | 233  | 2.00E-29  | 138  |
|                                                                                                                                                                                                   |                                                                                                                                                                                              |                                                                                                                                                                                               |                                                                              | ENST000000402917.Intron.4 | ENST000000402917.exon.1 | 66.22 | 2755870 | 2756009 | 1    | 222  | 3.00E-22  | 116  |
| ENST000000298139(97 210 356 505 656 725 840 1<br>270 1381 1432*(11) 1517 1693 1721 1830 1899 1982 200<br>8 2077 2452 2484 2736 2831 2977 3148 3244 3<br>319 3396 3472 3585 3786 3838 4001 4216* ) | ENST000000028778(97 210 356 505 656 725 84<br>0 1270 1381 1432 1517 1693 1721 1830 1899 1982 200<br>8 2077 2452 2484 2736 2831 2977 3148 3244 3<br>319 3396 3472 3585 3786 3838 4001 4216* ) | ENSMUST0000003990(97 210 356 505 656 725 84<br>0 1270 1381 1432 1517 1693 1721 1830 1899 1982 200<br>8 2077 2452 2484 2736 2831 2977 3148 3244 3<br>319 3396 3472 3585 3786 3838 4001 4216* ) | 1432(new rest)                                                               | ENST000000298139.exon.10  | ENST000000298139.exon.1 | 100   | 1       | 81      | 1    | 81   | 3.00E-42  | 161  |
| ENST0000000303005(435*(1))                                                                                                                                                                        | ENST000000003368(13)                                                                                                                                                                         | ENSMUST000000080698(1)                                                                                                                                                                        | 435(new rest)                                                                | ENST000000303005.Intron.1 | ENST000000303005.exon.2 | 66.22 | 63      | 506     | 52   | 505  | 3.00E-73  | 252  |
|                                                                                                                                                                                                   |                                                                                                                                                                                              |                                                                                                                                                                                               |                                                                              | ENST000000303005.Intron.1 | ENST000000303005.exon.2 | 66.67 | 5       | 58      | 5    | 58   | 3.00E-73  | 176  |
|                                                                                                                                                                                                   |                                                                                                                                                                                              |                                                                                                                                                                                               |                                                                              | ENST000000303005.Intron.2 | ENST000000303005.exon.1 | 66.42 | 20229   | 20239   | 1    | 411  | 1.00E-57  | 218  |
| ENST00000000297(110 217 395 548 663*(5) 774*(<br>6) 885*(7) 986*(8) 1110(1199))                                                                                                                   | ENST000000017694(110 217 395 548 753 1110 <br>1199)                                                                                                                                          | ENSMUST0000014726(110 217 395 548 753 1110 <br>1199)                                                                                                                                          | 651(dup rest);774(dup rest);885(dup rest;<br>);986(dup rest)                 | ENST00000029902.exon.6    | ENST00000029902.exon.9  | 86.11 | 110     | 3       | 110  | 3    | 6.00E-19  | 77.6 |
|                                                                                                                                                                                                   |                                                                                                                                                                                              |                                                                                                                                                                                               |                                                                              | ENST00000029902.exon.6    | ENST00000029902.exon.7  | 77.78 | 2       | 109     | 2    | 109  | 5.00E-17  | 71   |
|                                                                                                                                                                                                   |                                                                                                                                                                                              |                                                                                                                                                                                               |                                                                              | ENST00000029902.exon.6    | ENST00000029902.exon.8  | 69.7  | 101     | 3       | 101  | 3    | 7.00E-13  | 57.4 |
|                                                                                                                                                                                                   |                                                                                                                                                                                              |                                                                                                                                                                                               |                                                                              | ENST00000029902.exon.7    | ENST00000029902.exon.8  | 90.91 | 101     | 3       | 101  | 3    | 2.00E-19  | 79   |
|                                                                                                                                                                                                   |                                                                                                                                                                                              |                                                                                                                                                                                               |                                                                              | ENST00000029902.exon.7    | ENST00000029902.exon.9  | 77.78 | 2       | 109     | 2    | 109  | 8.00E-17  | 70.3 |
|                                                                                                                                                                                                   |                                                                                                                                                                                              |                                                                                                                                                                                               |                                                                              | ENST00000029902.exon.8    | ENST00000029902.exon.9  | 63.64 | 101     | 3       | 101  | 3    | 4.00E-12  | 54.7 |
|                                                                                                                                                                                                   |                                                                                                                                                                                              |                                                                                                                                                                                               |                                                                              | ENST00000029902.Intron.8  | ENST00000029902.exon.9  | 83.33 | 435     | 542     | 2    | 109  | 3.00E-17  | 75.8 |
|                                                                                                                                                                                                   |                                                                                                                                                                                              |                                                                                                                                                                                               |                                                                              | ENST00000029902.Intron.8  | ENST00000029902.exon.6  | 80.56 | 435     | 542     | 2    | 109  | 6.00E-17  | 74.8 |
|                                                                                                                                                                                                   |                                                                                                                                                                                              |                                                                                                                                                                                               |                                                                              | ENST00000029902.Intron.8  | ENST00000029902.exon.7  | 83.33 | 435     | 542     | 2    | 109  | 8.00E-17  | 74.4 |
|                                                                                                                                                                                                   |                                                                                                                                                                                              |                                                                                                                                                                                               |                                                                              | ENST00000029902.Intron.8  | ENST00000029902.exon.8  | 69.7  | 435     | 533     | 2    | 100  | 4.00E-11  | 55.6 |
| ENST0000000389400(68*(1))                                                                                                                                                                         | ENST000000013079(63 167 355 570 680)                                                                                                                                                         | ENSMUST0000002972(63 167 355 570 680)                                                                                                                                                         | 486(new rest)                                                                | ENST000000389400.Intron.1 | ENST000000389400.exon.1 | 100   | 9       | 29      | 442  | 462  | 4.00E-09  | 42.1 |
| ENST0000000083030(1 201*(1) 249 341 409 630 713 <br>851 1004 1246)                                                                                                                                | ENST000000017858(630 713 851 1004 1249)                                                                                                                                                      | ENSMUST00000085240(249 341 409 630 713 851 1<br>004 1246)                                                                                                                                     | 201(new rest)                                                                | ENST000000083030.Intron.1 | ENST000000083030.exon.6 | 45.07 | 87553   | 87341   | 1    | 213  | 2.00E-18  | 92.3 |
| ENST000000043374(1*(11 117*(13) 133 350 450 550 <br>0 687 844 916 988)                                                                                                                            | ENSMUST0000002648(133 261 450 550 657 844 9<br>16 988)                                                                                                                                       | ENSMUST0000009453(133 261 450 550 657 844 9<br>16 988)                                                                                                                                        | 13(new 13(new rest))                                                         | ENST000000043374.Intron.1 | ENST000000043374.exon.1 | 98.71 | 124     | 305     | 48   | 225  | 2.00E-07  | 47.8 |

|                                                                                                                                                           |                                                                                                                                                             |                                                                                                                                                |                                            |                          |                        |       |       |       |      |      |           |      |
|-----------------------------------------------------------------------------------------------------------------------------------------------------------|-------------------------------------------------------------------------------------------------------------------------------------------------------------|------------------------------------------------------------------------------------------------------------------------------------------------|--------------------------------------------|--------------------------|------------------------|-------|-------|-------|------|------|-----------|------|
| ENST00000395180(952*(1);956*(2);)                                                                                                                         | ENSMUT00000099917(1)                                                                                                                                        | ENSBTAT0000008346(15;)                                                                                                                         | 992(new new):                              | ENST00000395180.Intron.2 | ENST00000395180.exon.1 | 65.96 | 2535  | 2254  | 25   | 306  | 6.00E-116 | 150  |
|                                                                                                                                                           |                                                                                                                                                             |                                                                                                                                                |                                            | ENST00000395180.Intron.3 | ENST00000395180.exon.1 | 65.82 | 1584  | 1676  | 583  | 851  | 6.00E-115 | 145  |
|                                                                                                                                                           |                                                                                                                                                             |                                                                                                                                                |                                            | ENST00000395180.Intron.2 | ENST00000395180.exon.1 | 64.04 | 2259  | 1993  | 304  | 570  | 6.00E-115 | 142  |
| ENST00000317221(34;161;409*(6);)                                                                                                                          | ENSBTAT0000004598(34;161;)                                                                                                                                  | ENSMUT00000109060(4;141;291;)                                                                                                                  | 409(new est):                              | ENST00000317221.exon.7   | ENST00000317221.exon.7 | 55.56 | 1316  | 1369  | 1238 | 1291 | 2.00E-108 | 345  |
| ENST00000368197(34*(1);228;303;376;444;596;739;872;1200;1202;1276;1379;1526;1657;1830;2071;2320;)                                                         | ENSBTAT00000003960(228;303;376;444;596;739;872;1202;1200;1276;1379;1526;1657;1830;2071;2320;)                                                               | ENSMUT00000029713(228;303;376;444;596;739;872;1202;1200;1276;1379;1526;1657;1830;2071;2320;)                                                   | 34(new):                                   | ENST00000368197.exon.2   | ENST00000368197.exon.1 | 66.67 | 113   | 33    | 116  | 196  | 3.00E-08  | 44.1 |
|                                                                                                                                                           |                                                                                                                                                             |                                                                                                                                                |                                            | ENST00000368197.Intron.1 | ENST00000368197.exon.1 | 60.71 | 25309 | 25826 | 4    | 87   | 3.00E-11  | 47.3 |
|                                                                                                                                                           |                                                                                                                                                             |                                                                                                                                                |                                            | ENST00000368197.Intron.1 | ENST00000368197.exon.1 | 62.5  | 25689 | 25618 | 88   | 159  | 3.00E-11  | 38.6 |
| ENST00000356478(423*(1);942*(2);)                                                                                                                         | ENSBTAT00000024378(1)                                                                                                                                       | ENSMUT0000007698(1)                                                                                                                            | 423(new 942 new):                          | ENST00000356478.Intron.1 | ENST00000356478.exon.2 | 91.71 | 1     | 519   | 1    | 519  | 0         | 698  |
|                                                                                                                                                           |                                                                                                                                                             |                                                                                                                                                |                                            | ENST00000356478.Intron.1 | ENST00000356478.exon.1 | 92.09 | 1584  | 16280 | 1    | 417  | 2.00E-162 | 565  |
| ENST00000303915(86;178;305;1036*(6);)                                                                                                                     | ENSBTAT00000037194(86;178;305;)                                                                                                                             | ENSMUT00000049393(86;178;305;)                                                                                                                 | 1036(new est):                             | ENST00000303915.Intron.6 | ENST00000303915.exon.7 | 60.78 | 7080  | 6928  | 256  | 4    | 6.00E-21  | 51.8 |
|                                                                                                                                                           |                                                                                                                                                             |                                                                                                                                                |                                            | ENST00000303915.Intron.6 | ENST00000303915.exon.7 | 63.66 | 7092  | 6880  | 162  | 40   | 5.00E-12  | 82   |
|                                                                                                                                                           |                                                                                                                                                             |                                                                                                                                                |                                            | ENST00000303915.exon.7   | ENST00000303915.exon.7 | 62.9  | 72    | 1     | 156  | 85   | 2.00E-09  | 47.8 |
| ENST00000393865(236;338;317;427;2041*(1);)                                                                                                                | ENSMUT00000008186(26;109;236;344;317;427;)                                                                                                                  | ENSBTAT00000005383(26;317;401;436;519;670;222;)                                                                                                | 2041(new est):                             | ENST00000393865.exon.11  | ENST00000393865.exon.1 | 33.33 | 276   | 374   | 42   | 140  | 7.00E-66  | 174  |
| ENST00000382658(1107217;395;548;663*(6);7774*(7);885*(8);996;1085;)                                                                                       | ENSBTAT00000017696(1107217;395;548;753;996;1085;)                                                                                                           | ENSMUT00000114726(1107217;395;548;753;996;1085;)                                                                                               | 663(dup est:7774 dup est:885 new est:996): | ENST00000382658.exon.7   | ENST00000382658.exon.8 | 77.78 | 2     | 109   | 2    | 109  | 6.00E-17  | 71   |
|                                                                                                                                                           |                                                                                                                                                             |                                                                                                                                                |                                            | ENST00000382658.exon.7   | ENST00000382658.exon.9 | 70.97 | 95    | 3     | 95   | 3    | 1.00E-12  | 57   |
|                                                                                                                                                           |                                                                                                                                                             |                                                                                                                                                |                                            | ENST00000382658.exon.8   | ENST00000382658.exon.9 | 90.62 | 98    | 3     | 98   | 3    | 4.00E-19  | 98.5 |
|                                                                                                                                                           |                                                                                                                                                             |                                                                                                                                                |                                            | ENST00000382658.Intron.9 | ENST00000382658.exon.7 | 89.11 | 1831  | 824   | 110  | 2    | 1.00E-17  | 77.8 |
|                                                                                                                                                           |                                                                                                                                                             |                                                                                                                                                |                                            | ENST00000382658.Intron.9 | ENST00000382658.exon.7 | 80.66 | 426   | 542   | 2    | 109  | 8.00E-17  | 74.8 |
|                                                                                                                                                           |                                                                                                                                                             |                                                                                                                                                |                                            | ENST00000382658.Intron.9 | ENST00000382658.exon.8 | 83.33 | 436   | 542   | 2    | 109  | 1.00E-16  | 74.4 |
|                                                                                                                                                           |                                                                                                                                                             |                                                                                                                                                |                                            | ENST00000382658.Intron.9 | ENST00000382658.exon.9 | 68.7  | 436   | 533   | 2    | 109  | 5.00E-11  | 65.4 |
| ENST00000343158(168;475;569;1263*(4);2286;)                                                                                                               | ENSBTAT00000005678(17;66;467;483;545;879;598;666;757;961;1085;1089;1102;)                                                                                   | ENSMUT00000005110(1)                                                                                                                           | 1263(new):                                 | ENST00000343158.Intron.2 | ENST00000343158.exon.3 | 90.59 | 1063  | 1147  | 2    | 86   | 1.00E-25  | 105  |
|                                                                                                                                                           |                                                                                                                                                             |                                                                                                                                                |                                            | ENST00000343158.Intron.2 | ENST00000343158.exon.3 | 86.02 | 2     | 91    | 2    | 94   | 3.00E-17  | 77.8 |
| ENST00000355988(110;303;422;592;1125*(5);)                                                                                                                | ENSBTAT00000002404(110;303;422;592;)                                                                                                                        | ENSMUT00000113938(110;303;422;592;)                                                                                                            | 1125(new est):                             | ENST00000355988.Intron.4 | ENST00000355988.exon.3 | 96.3  | 676   | 902   | 66   | 92   | 6.00E-08  | 46.1 |
| ENST00000399779(50;211*(2);)                                                                                                                              | ENSBTAT00000005498(50;)                                                                                                                                     | ENSMUT00000101281(50;)                                                                                                                         | 211(new):                                  | ENST00000399779.Intron.2 | ENST00000399779.exon.2 | 53.66 | 1291  | 1303  | 9    | 131  | 2.00E-11  | 81.1 |
| ENST00000304219(58;124;181;107;418;589;640;94;96;774;950;1023;1234;1396;1483;1705;2098;2205;2357;2456;2464;2640;2761;2879;3050;3194;3329;3430;3860;3860;) | ENSMUT00000072441(58;124;181;107;418;589;640;94;96;774;950;1023;1234;1396;1483;1705;2098;2205;2357;2456;2464;2640;2761;2879;3050;3194;3329;3430;3860;3860;) | ENSBTAT00000004658(107;418;480;589;640;1057;74;950;1023;1234;1396;1483;1705;2098;2205;2357;2456;2640;2761;2879;3050;3194;3329;3430;3860;3860;) | 1867(new est):                             | ENST00000304219.exon.15  | ENST00000304219.exon.1 | 50    | 71    | 30    | 128  | 87   | 3.00E-13  | 58.8 |
